# Supplementary material for: Prolinamide plays a key role in promoting copper-catalyzed cycloaddition of azides and alkynes in aqueous media via unprecedented metallacycle intermediates
Source: Royal Society of Chemistry journal article supplement (doi:10.1039/d0qo01150a), 2021-01-01

# **Prolinamide plays a key role in promoting copper-catalyzed cycloaddition of azides and alkynes in aqueous media via unprecedented metallacycle intermediates**

Gargi Chakraborti, Rajkumar Jana, Tirtha Mandal, Ayan Datta\* and Jyotirmayee Dash\*

*School of Chemical Sciences, Indian Association for the Cultivation of Science, Jadavpur, Kolkata 700032, India, email: [spad@iacs.res.in](mailto:spad@iacs.res.in); [ocjd@iacs.res.in](mailto:ocjd@iacs.res.in)*

## **Contents**

|                                                                                                                              |     |
|------------------------------------------------------------------------------------------------------------------------------|-----|
| 1.0 General information                                                                                                      | S2  |
| 2.0 Optimization of reaction conditions                                                                                      | S3  |
| 3.0 Preparation of ligands                                                                                                   | S6  |
| 4.0 General procedure for cycloaddition of aromatic azides and aromatic alkynes (GP-1)                                       | S10 |
| 5.0 General procedure for cycloaddition of aliphatic/heteroaromatic azides and nucleobase derived azides with alkynes (GP-2) | S10 |
| 6.0 General procedure for the synthesis of triazoles from alkyl halides (GP-3)                                               | S11 |
| 7.0 General procedure for a relay Ullmann-CuAAC sequence (GP-4)                                                              | S11 |
| 8.0 Gram scale experiments                                                                                                   | S11 |
| 9.0 Control experiment using Cu acetylide                                                                                    | S12 |
| 10.0 General information on computational methods                                                                            | S13 |
| 11.0 Free energy profile for mononuclear and binuclear CuAAC reaction pathway                                                | S14 |
| 12.0 Cartesian coordinates of metallacycle intermediates and transition states                                               | S15 |
| 13.0 Analytical data of all compounds                                                                                        | S28 |
| 14.0 NMR spectra of all compounds                                                                                            | S39 |

## **1.0 General information**

All experiments were carried out in flame-dried reaction vials. Solvents were dried using standard procedures. All starting materials were obtained from commercial suppliers and used as received. Products were purified by flash chromatography on silica gel (100-200 mesh, Merck). Unless otherwise stated, yields refer to analytical pure samples. NMR spectra were recorded in CDCl<sub>3</sub> and DMSO-d<sub>6</sub>. **<sup>1</sup>H NMR** spectra were recorded at 500 MHz using Brüker AVANCE 500 MHz and JEOL 400 MHz instruments at 278 K. Signals are quoted as  $\delta$  values in ppm using residual protonated solvent signals as internal standard (CDCl<sub>3</sub>:  $\delta$  7.26 ppm). Data is reported as follows: chemical shift, multiplicity (s = singlet, d = doublet, t = triplet, q = quartet, m = multiplet, br = broad), integration and coupling constants (Hz). **<sup>13</sup>C NMR** spectra were recorded on either a JEOL-400 (100 MHz), or a Brüker AVANCE 500 MHz (125 MHz) with complete proton decoupling. Chemical shifts ( $\delta$ ) are reported in ppm downfield from tetramethylsilane with the solvent as the internal reference (CDCl<sub>3</sub>:  $\delta$  77.26 ppm). **HRMS** analyses were performed with Q-TOF YA263 high resolution (Water Corporation) instruments by +ve mode electrospray ionization.

## 2.0 Optimization of reaction conditions

To optimize the cycloaddition, various reaction conditions were investigated, including the choice of solvent, ligand and copper catalyst. Different solvents were screened (entries 3-9, Table S1), and the results suggested that water is the best choice for the reaction (entry 1). When the cycloaddition was performed in the presence of *tert*-butanol, DMSO, EtOH and DMF, the triazole product **3a** was obtained in low yields (entries 3-6). It was observed that the reaction did not proceed well in solvents like benzene, MeCN and 1,4-dioxane (entries 7-9). Next, we evaluated the effect of different ligands such as DMEDA, phenanthroline, *L*-proline and chiral prolinamide derivatives **Pro-1**, **Pro-2**, and **Pro-3** on the cycloaddition (entries 10-16). DMEDA, phenanthroline and *L*-proline resulted in poor conversion of the starting materials (entries 10-12), while among the prolinamide derivatives, **Pro-1** was found to be the optimal ligand for the cycloaddition (entry 1). Finally, screening the reaction with copper catalysts revealed that CuI promotes the reaction more efficiently as compared to other copper salts (CuBr, Cu(OAc)<sub>2</sub>, CuO) as well as Cu(0) (Table S1, entries 17-20).

**Table S1. Optimization of reaction conditions<sup>a</sup>**

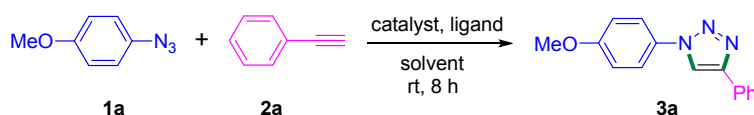

| entry    | ligand              | catalyst   | solvent               | time       | yield (%) <sup>b</sup> |
|----------|---------------------|------------|-----------------------|------------|------------------------|
| <b>1</b> | <b>Pro-1</b>        | <b>CuI</b> | <b>H<sub>2</sub>O</b> | <b>8 h</b> | <b>95</b>              |
| 2        | -                   | CuI        | H <sub>2</sub> O      | 48 h       | 20                     |
| 3        | <b>Pro-1</b>        | CuI        | <i>tert</i> -butanol  | 8 h        | 60                     |
| 4        | <b>Pro-1</b>        | CuI        | DMSO                  | 8 h        | 50                     |
| 5        | <b>Pro-1</b>        | CuI        | EtOH                  | 8 h        | 57                     |
| 6        | <b>Pro-1</b>        | CuI        | DMF                   | 8 h        | 55                     |
| 7        | <b>Pro-1</b>        | CuI        | Benzene               | 8 h        | 25                     |
| 8        | <b>Pro-1</b>        | CuI        | MeCN                  | 8 h        | 15                     |
| 9        | <b>Pro-1</b>        | CuI        | 1,4-Dioxane           | 8 h        | 18                     |
| 10       | DMEDA               | CuI        | H <sub>2</sub> O      | 8 h        | 40                     |
| 11       | Phenanthroline      | CuI        | H <sub>2</sub> O      | 8 h        | 51                     |
| 12       | <i>L</i> -Proline   | CuI        | H <sub>2</sub> O      | 8 h        | 65                     |
| 13       | <i>D,L</i> -Proline | CuI        | H <sub>2</sub> O      | 8 h        | 60                     |

|    |                   |                      |                  |     |    |
|----|-------------------|----------------------|------------------|-----|----|
| 14 | <i>D,L</i> -Pro-1 | CuI                  | H <sub>2</sub> O | 8 h | 95 |
| 15 | <b>Pro-2</b>      | CuI                  | H <sub>2</sub> O | 8 h | 68 |
| 16 | <b>Pro-3</b>      | CuI                  | H <sub>2</sub> O | 8 h | 40 |
| 17 | <b>Pro-1</b>      | Cu(OAc) <sub>2</sub> | H <sub>2</sub> O | 8 h | 21 |
| 18 | <b>Pro-1</b>      | CuO                  | H <sub>2</sub> O | 8 h | -  |
| 19 | <b>Pro-1</b>      | CuBr                 | H <sub>2</sub> O | 8 h | 57 |
| 20 | <b>Pro-1</b>      | Cu(0)                | H <sub>2</sub> O | 8 h | -  |

<sup>a</sup>Reaction conditions: **1a** (1.0 mmol), **2a** (1.5 mmol) in 2 mL solvent; <sup>b</sup>yield refers to the isolated yield without chromatographic purification.

**Table S2. Effect of concentration of ligand, Cu(I) and time on the cycloaddition of *p*-azidoanisole (**1a**) with phenylacetylene (**2a**).<sup>a</sup>**

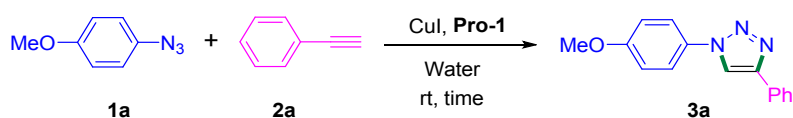

| entry    | <b>Pro-1</b> (mol%) | CuI (mol%) | time (h) | conversion (%) <sup>b</sup> |
|----------|---------------------|------------|----------|-----------------------------|
| 1        | 2                   | 5          | 8        | 50                          |
| 2        | 5                   | 5          | 8        | 65                          |
| 3        | 8                   | 5          | 8        | 80                          |
| <b>4</b> | <b>10</b>           | <b>5</b>   | <b>8</b> | <b>98</b>                   |
| 5        | 10                  | 2          | 8        | 75                          |
| 6        | 10                  | 5          | 2        | 55                          |
| 7        | 10                  | 5          | 4        | 70                          |
| 8        | 10                  | 5          | 6        | 90                          |

<sup>a</sup>Reaction conditions: **1a** (1.0 mmol), **2a** (1.5 mmol) in 2 mL water; <sup>b</sup>The conversion of **1a** was determined from <sup>1</sup>H NMR analysis of crude reaction mixture.

The highest conversion was obtained when 10 mol% **Pro-1** and 5 mol% CuI were used and the reaction was stirred at room temperature in the presence of water for 8 h (entry 4, Table S2).



**Table S3. Optimization of reaction conditions for one-pot sequential synthesis of triazoles from alkyl halides<sup>a</sup>**

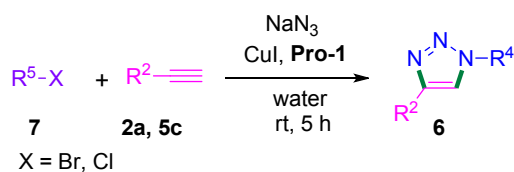

| entry    | alkyl halide (equiv) | NaN <sub>3</sub> (equiv) | time (h) | conversion (%) <sup>b</sup> |
|----------|----------------------|--------------------------|----------|-----------------------------|
| <b>1</b> | <b>1</b>             | <b>1.2</b>               | <b>5</b> | <b>90</b>                   |
| 2        | 2                    | 1.2                      | 5        | 85                          |
| 3        | 1                    | 1.0                      | 5        | 80                          |
| 4        | 1                    | 1.1                      | 5        | 85                          |

<sup>a</sup>Reaction conditions: **2a, 5c** (1.50 mmol), CuI (0.05 mmol), **Pro-1** (0.1 mmol), in 2 mL water; <sup>b</sup>The conversion of **7** was determined from <sup>1</sup>H NMR analysis of crude reaction mixture.

**Table S4. Optimization of reaction for a relay Ullmann-CuAAC sequence<sup>a</sup>**

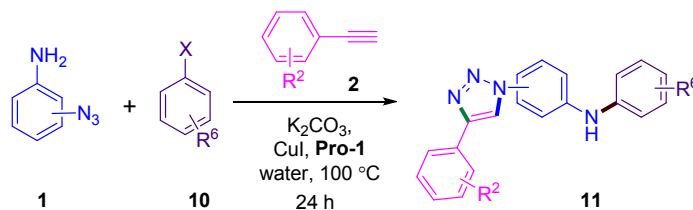

| entry | aryl halide (equiv) | <b>Pro-1</b> (mol%) | CuI (mol%) | K <sub>2</sub> CO <sub>3</sub> (equiv) | time (h) | temp (°C) | conversion <sup>b</sup> (%) |
|-------|---------------------|---------------------|------------|----------------------------------------|----------|-----------|-----------------------------|
| 1     | 1.5                 | 30                  | 15         | 0.5                                    | 24       | 100       | 55                          |
| 2     | 1.5                 | 30                  | 15         | 1.0                                    | 24       | 100       | 65                          |
| 3     | 1.5                 | 30                  | 15         | 1.5                                    | 24       | 100       | 75                          |
| 5     | 1.5                 | 10                  | 15         | 2.0                                    | 24       | 100       | 30                          |
| 6     | 1.5                 | 20                  | 15         | 2.0                                    | 24       | 100       | 40                          |
| 7     | 1.5                 | 25                  | 15         | 2.0                                    | 24       | 100       | 70                          |
| 8     | 1.5                 | 30                  | 10         | 2.0                                    | 24       | 100       | 55                          |
| 9     | 1.5                 | 30                  | 12         | 2.0                                    | 24       | 100       | 75                          |
| 10    | 1.5                 | 30                  | 15         | 2.0                                    | 12       | 100       | 30                          |
| 11    | 1.5                 | 30                  | 15         | 2.0                                    | 18       | 100       | 65                          |

| <b>12</b> | <b>1.5</b> | <b>30</b> | <b>15</b> | <b>2.0</b> | <b>24</b> | <b>100</b> | <b>90</b> |
|-----------|------------|-----------|-----------|------------|-----------|------------|-----------|
| 12        | 1.5        | 30        | 15        | 3.0        | 24        | 100        | 85        |
| 13        | 1.5        | 30        | 15        | 2.0        | 48        | 100        | 85        |
| 14        | 1          | 30        | 15        | 2.0        | 24        | 100        | 60        |
| 15        | 1.2        | 30        | 15        | 2.0        | 24        | 100        | 70        |
| 16        | 1.5        | 30        | 15        | 2.0        | 24        | 80         | 40        |
| 17        | 1.5        | 30        | 15        | 2.0        | 24        | 120        | 90        |

<sup>a</sup>Reaction conditions: **1** (1.0 mmol), **2** (1.50 mmol) in 2 mL water; <sup>b</sup>The conversion of **1** was determined from <sup>1</sup>H NMR analysis after chromatographic purification.

### 3.0 Preparation of ligands

**Preparation of azido prolinamide S3:**<sup>1</sup> To an ice-cold suspension of *N*-Boc proline **S1** (1.0 g, 4.65 mmol) in dry CH<sub>2</sub>Cl<sub>2</sub> (25 mL), DCC (1.06 g, 5.1 mmol, 1.1 equiv) and HOBT (691 mg, 5.1 mmol, 1.1 equiv) were added and the mixture was allowed to stir for 45 min. Then, a solution of 4-azidoaniline **S2**<sup>2</sup> (624 mg, 4.65 mmol, 1.0 equiv) in dry CH<sub>2</sub>Cl<sub>2</sub> (20 mL) was added dropwise to the reaction mixture, and stirred for 12 h. After complete consumption of the azide **S2** (TLC monitoring), the reaction mixture was filtered through celite, washed with dichloromethane (50 mL) and concentrated under vacuum. The product was purified by flash chromatography using hexane-ethylacetate (95:5 to 85:15) as eluent to afford the desired product **S3** as a yellow solid (1.50 g, 88 %) (Scheme S1). <sup>1</sup>H NMR (400 MHz, CDCl<sub>3</sub>): 9.61 (br s, 1H), 7.48 (d, 2H, *J* = 9.4 Hz), 6.89 (br s, 1H), 4.47 (br s, 1H), 3.45-3.36 (m, 2H), 2.44 (br s, 1H), 1.99-1.90 (m, 3H), 1.48 (s, 9H); <sup>13</sup>C NMR (100 MHz, CDCl<sub>3</sub>): 170.0, 156.5, 135.5, 134.9, 120.8, 119.2, 80.9, 60.4, 47.3, 28.3, 27.5, 24.5; HRMS (ESI) calcd for C<sub>16</sub>H<sub>21</sub>N<sub>5</sub>O<sub>3</sub>K (M+K)<sup>+</sup>: 370.1281; found: 370.1268.

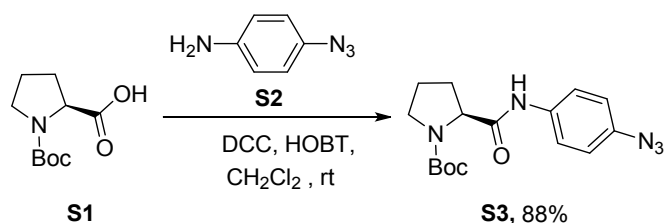

**Scheme S1.** Preparation of azido prolinamide **S3**.

**Preparation of Pro-1:** A Cu(I)-catalyzed cycloaddition of azido prolinamide **S3** and phenyl acetylene (**S4**) afforded triazole derivative **S5**, which upon removal of Boc group afforded ligand **Pro-1** (Scheme S2).

<sup>1</sup>S. Paladhi, J. Das, P. K. Mishra and J. Dash, *Adv. Synth. Catal.*, 2013, **355**, 274-280.

<sup>2</sup>J. Andersen, U. Madsen, F. Björkling and X. Liang, *Synlett*, 2005, 2209-2213.

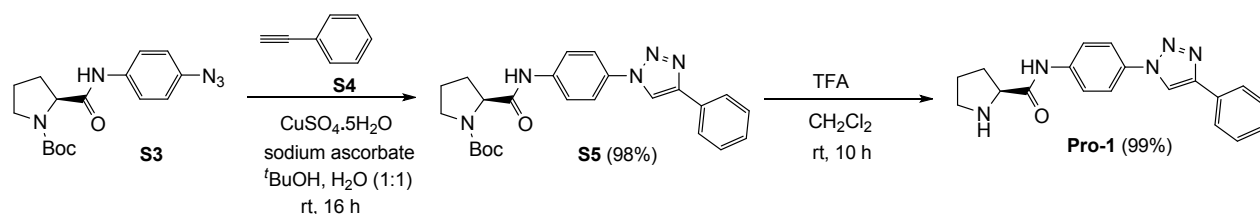

**Scheme S2.** Synthesis of ligand **Pro-1**.

**Preparation of triazole derivative S5:** Phenyl acetylene (**S4**) (1.08 mL, 9.8 mmol), sodium ascorbate (194 mg, 0.98 mmol, 0.1 equiv), CuSO<sub>4</sub>·5H<sub>2</sub>O (122.4 mg, 0.49 mmol, 0.05 equiv) were dissolved in 10 mL *t*BuOH-H<sub>2</sub>O (7:3) mixture. Then the azido prolinamide **S3** (3.3 g, 9.8 mmol, 1.0 equiv) was added and stirred at room temperature for 16 h. After complete consumption of **S3** as monitored by TLC, the reaction mixture was concentrated and the residue was purified by flash chromatography using hexane-ethyl acetate (90:10 to 50:50) mixture to give the pure product **S5** (4.12 g, 98%) as a colorless solid (Scheme S2). <sup>1</sup>H NMR (400 MHz): 9.97 (s, 1H), 8.08 (s, 1H), 7.84 (d, 2H, *J* = 9.1 Hz), 7.57 (d, 2H, *J* = 9.6 Hz), 7.44 (d, 2H, *J* = 9.2 Hz), 7.35 (t, 2H, *J* = 8.5 Hz), 7.36-7.30 (m, 1H), 4.56 (s, 1H), 3.57-3.54 (m, 2H), 2.53 (s, 1H), 2.08-1.91 (m, 3H), 1.51 (s, 9H); <sup>13</sup>C NMR (100 MHz): 171.1, 155.7, 148.1, 139.1, 132.0, 130.0, 128.7, 128.1, 125.6, 120.8, 119.9, 117.7, 80.7, 60.4, 47.2, 28.9, 28.3, 24.5; HRMS (ESI) calcd for C<sub>24</sub>H<sub>27</sub>N<sub>5</sub>O<sub>3</sub>K (M+K)<sup>+</sup>: 472.1751; found, 472.1783.

**Preparation of ligand Pro-1:** To an ice cold solution of compound **S5** (1.0 g, 2.3 mmol) in 30 mL CH<sub>2</sub>Cl<sub>2</sub> was added TFA (0.53 mL, 6.9 mmol, 3.0 equiv) and the mixture was stirred for 10 h at room temperature. After consumption of the starting material **S5** (monitored by TLC), the reaction mixture was brought to pH 8-9 by dropwise addition of solution of liquid NH<sub>3</sub> (30%) at 0 °C. Then the reaction mixture was extracted with CH<sub>2</sub>Cl<sub>2</sub> (3 x 20 mL), evaporated and dried under vacuum to give **Pro-1** (760 mg, 99%) as a white solid (Scheme S2). <sup>1</sup>H NMR (400 MHz): 9.98 (s, 1H), 8.17 (s, 1H), 7.89 (d, 2H, *J* = 8.8 Hz), 7.77 (d, 2H, *J* = 11.3 Hz), 7.72 (d, 2H, *J* = 11.1 Hz), 7.44 (t, 2H, *J* = 9.5 Hz), 7.35 (t, 1H, *J* = 9.2 Hz), 3.89 (dd, 1H, *J* = 11.6, 6.5 Hz), 3.09 (td, 1H, *J* = 12.8, 8.5 Hz), 3.00 (td, 1H, *J* = 12.8, 7.9 Hz), 2.40 (br s, 1H), 2.25-2.20 (m, 1H), 2.04 (dt, 1H, *J* = 15.6, 8.3 Hz), 1.79-1.74 (m, 2H); <sup>13</sup>C NMR (100 MHz): 173.7, 148.2, 138.3, 132.6, 130.2, 128.8, 128.3, 125.8, 121.1, 120.0, 117.6, 60.9, 47.3, 30.7, 26.3; HRMS (ESI) calcd for C<sub>19</sub>H<sub>20</sub>N<sub>5</sub>O (M+H)<sup>+</sup>: 334.1667; found, 334.1693.

**Preparation of Pro-2:** A Cu(I)-catalyzed cycloaddition of azido prolinamide **S3** and 2-ethynylpyridine **S6** gave triazole derivative **S7**, which upon the removal of Boc group afforded **Pro-2** (Scheme S3).

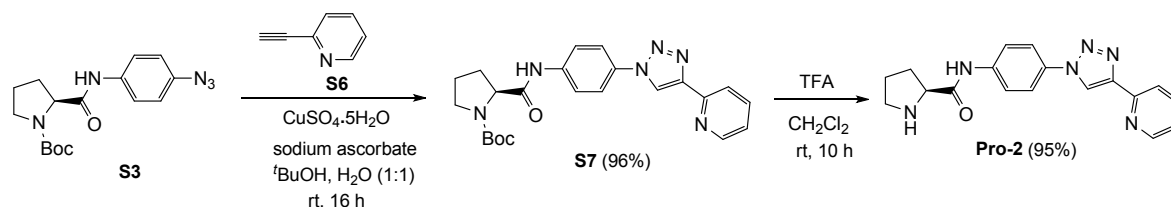

**Scheme S3.** Synthesis of **Pro-2**.

**Preparation of triazole derivative S7:** 2-Ethynylpyridine **S6** (1.08 mL, 9.8 mmol), sodium ascorbate (194 mg, 0.98 mmol, 0.1 equiv), CuSO<sub>4</sub>·5H<sub>2</sub>O (122.4 mg, 0.49 mmol, 0.05 equiv) were dissolved in 10 mL *t*BuOH-H<sub>2</sub>O (7:3) mixtures. Then the azido prolinamide **S3** (3.3 g, 9.8 mmol, 1.0 equiv) was added and stirred at room temperature for 16 h. After complete consumption of **S3** as monitored by TLC, the reaction mixture was concentrated and the residue was purified by flash chromatography using hexane-ethyl acetate (90:10 to 40:60) mixture to give the pure product **S7** (4.00 g, 96%) as a colorless solid (Scheme S3). <sup>1</sup>H NMR (400 MHz, DMSO-*d*<sup>6</sup>): 10.3 (br s, 1H), 9.23 (s, 1H), 8.64 (d, 1H, *J* = 3.9 Hz), 8.11 (d, 2H, *J* = 7.8 Hz), 7.96 (d, 3H, *J* = 8.3 Hz), 7.83 (d, 2H, *J* = 8.3 Hz), 7.40 (t, 1H, *J* = 5.4 Hz), 4.29-4.21 (m, 1H), 2.27-2.19 (m, 1H), 1.91-1.81 (m, 3H), 1.41 (s, 3H), 1.28 (s, 6H); <sup>13</sup>C NMR (100 MHz, DMSO-*d*<sup>6</sup>): 171.9, 153.2, 149.6, 149.5, 147.9, 139.5, 137.4, 131.7, 123.3, 120.9, 120.8, 119.9, 119.8, 78.6, 60.5, 46.7, 30.9, 27.8, 23.3; HRMS (ESI) calcd for C<sub>23</sub>H<sub>27</sub>N<sub>6</sub>O<sub>3</sub> (M+H)<sup>+</sup>: 435.2145; found, 435.2144.

**Preparation of ligand Pro-2:** To an ice cold solution of compound **S7** (1.0 g, 2.3 mmol) in 30 mL dry CH<sub>2</sub>Cl<sub>2</sub>, added TFA (0.53 mL, 6.9 mmol, 3.0 equiv) and the mixture was stirred for 10 h at room temperature. After consumption of the starting material **S7** (monitored by TLC), the reaction mixture was brought to pH 8-9 by dropwise addition of 30 wt% solution of NH<sub>3</sub> in water at 0 °C. Then the reaction mixture was extracted with CH<sub>2</sub>Cl<sub>2</sub> (3 x 20 mL), evaporated and dried under vacuum, to give **Pro-2** (730 mg, 95%) as a white solid (Scheme S3). <sup>1</sup>H NMR (500 MHz, DMSO-*d*<sup>6</sup>): 10.3 (br s, 1H), 9.24 (s, 1H), 8.64 (d, 1H, *J* = 3.4 Hz), 8.11 (d, 2H, *J* = 7.6 Hz), 7.96-7.89 (m, 5H), 7.39 (t, 1H, *J* = 5.1 Hz), 3.75 (s, 1H), 2.92 (t, 2H, *J* = 6.7 Hz), 2.11-2.04 (m, 1H), 1.84-1.78 (m, 1H), 1.67 (t, 1H, *J* = 5.9 Hz), 1.34 (s, 1H); <sup>13</sup>C NMR (100 MHz, DMSO-*d*<sup>6</sup>): 173.7, 149.6, 149.5, 148.1, 138.9, 137.3, 131.8, 123.3, 120.9, 120.7, 120.0, 119.8, 60.8, 46.7, 30.4, 25.8; HRMS (ESI) calcd for C<sub>18</sub>H<sub>19</sub>N<sub>6</sub>O (M+H)<sup>+</sup>: 335.1620; found, 335.1622.

**Preparation of 3-azidoaniline S9:** Following the literature procedure,<sup>3</sup> to a solution of 3-bromoaniline **S8** (1.0 g, 5.8 mmol, 1.0 equiv) in a mixture of EtOH-H<sub>2</sub>O (7:3, 25 mL) and sodium ascorbate (57.6 mg, 0.29 mmol, 0.05 equiv), CuI (115 mg, 0.58 mmol, 0.1 equiv), ligand *N,N'*-dimethylethylenediamine (94

<sup>3</sup>(a) J. Andersen, U. Madsen, F. Björkling and X. Liang, *Synlett*. 2005, 2209-2213; (b) S. Paladhi, J. Das, P. K. Mishra and J. Dash, *Adv. Synth. Catal.*, 2013, **355**, 274-280.

$\mu\text{L}$ , 0.87 mmol, 0.15 equiv) were added and stirred for 10 min. Sodium azide (755 mg, 11.62 mmol, 2.0 equiv) was added to the reaction mixture and the mixture was allowed to stir for 3 h at reflux under argon atmosphere. After complete consumption of **S8** (TLC analysis), the reaction was cooled, concentrated under vacuum and the crude product was purified by flash chromatography using hexane-ethyl acetate (95:5) mixture to give the desired azide **S9** (750 mg, 96%) as a brown solid.  $^1\text{H}$  NMR (400 MHz,  $\text{CDCl}_3$ ): 7.10 (t, 1H,  $J = 7.9$  Hz), 6.43 (dd, 2H,  $J = 6.7$  Hz, 1.8 Hz), 6.30 (t, 1H,  $J = 1.8$  Hz), 3.73 (br s, 2H);  $^{13}\text{C}$  NMR (100 MHz): 147.9, 141.1, 130.6, 111.9, 109.1, 105.5; HRMS (ESI) calcd for  $\text{C}_6\text{H}_7\text{N}_4(\text{M}+\text{H})^+$ : 135.0671; found: 135.0670.

**Preparation of 3-azido prolinamide S10:** To an ice-cold suspension of *N*-Boc proline **S2** (1.0 g, 4.65 mmol) in dry  $\text{CH}_2\text{Cl}_2$  (25 mL), DCC (1.06 g, 5.1 mmol, 1.1 equiv) and HOBT (691 mg, 5.1 mmol, 1.1 equiv) were added and the mixture was allowed to stir for 45 min. Then 3-azidoaniline **S9** (624 mg, 4.65 mmol, 1.0 equiv) in 20 mL dry  $\text{CH}_2\text{Cl}_2$  was added dropwise to the reaction mixture, and stirred for 12 h. After complete consumption of the azide **S9** (TLC monitoring), the reaction mixture was filtered through celite, washed with ethyl acetate (50 mL) and concentrated under vacuum. The product was purified by flash chromatography using hexane-ethylacetate (95:5 to 85:15) as eluent to afford the desired product **S10** as a yellow solid (1.42 g, 86 %) (Scheme S4).  $^1\text{H}$  NMR (400 MHz,  $\text{CDCl}_3$ ): 9.72 (s, 1H), 7.36 (s, 1H), 7.10 (s, 1H), 7.04 (s, 1H), 4.49 (s, 1H), 3.50-3.35 (m, 2H) 2.41-1.89 (m, 4H), 1.48 (s, 9H);  $^{13}\text{C}$  NMR (100 MHz,  $\text{CDCl}_3$ ): 170.5, 156.0, 140.2, 139.9, 129.6, 115.6, 114.0, 109.8, 80.8, 60.4, 47.1, 28.3, 24.5; HRMS (ESI) calcd for  $\text{C}_{16}\text{H}_{21}\text{N}_5\text{O}_3\text{K}(\text{M}+\text{K})^+$ : 370.1281; found: 370.1268.

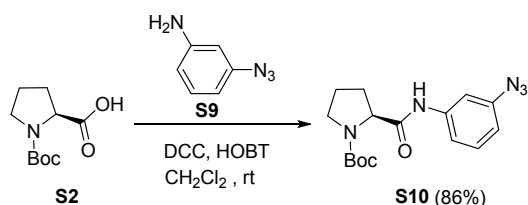

**Scheme S4.** Preparation of azido prolinamide **S10**.

**Preparation of Pro-3:** **Pro-3** was prepared by using Cu(I)-catalyzed cycloaddition of azido prolinamide **S10** and phenyl acetylene (**S4**) to give triazole derivative **S11**, which upon subsequent removal of Boc group afforded **Pro-3** (Scheme S5).

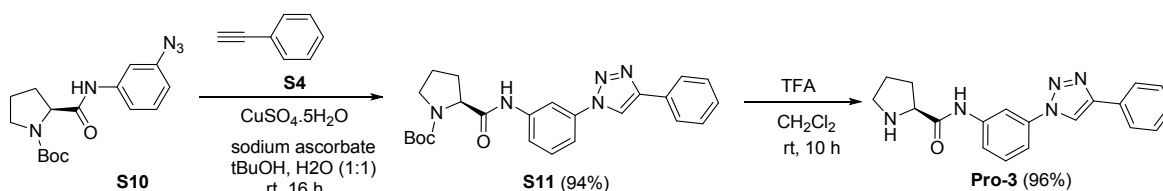

**Scheme S5.** Synthesis of ligand **Pro-3**.

**Preparation of triazole derivative S11:** Phenyl acetylene (**S4**) (1.08 mL, 9.8 mmol), sodium ascorbate (194 mg, 0.98 mmol, 0.1 equiv), CuSO<sub>4</sub>·5H<sub>2</sub>O (122.4 mg, 0.49 mmol, 0.05 equiv) were dissolved in 10 mL *t*BuOH-H<sub>2</sub>O (7:3) mixture. Then the azido prolinamide **S10** (3.3 g, 9.8 mmol, 1.0 equiv) was added and stirred at room temperature for 16 h. After complete consumption of **S10** as monitored by TLC, the reaction mixture was concentrated and the residue was purified by flash chromatography using hexane-ethyl acetate (90:10 to 50:50) mixture to give the crude product **S11** (4.02 g, 94%) as a colorless solid.

**Preparation of Pro-3:** To an ice cooled solution of crude compound **S11** (1.0 g, 2.3 mmol) in 30 mL CH<sub>2</sub>Cl<sub>2</sub>, added TFA (0.53 mL, 6.9 mmol, 3.0 equiv) and the mixture was stirred for 10 h at room temperature. After consumption of the starting material **S11** (monitored by TLC), the reaction mixture was brought to pH 8-9 by dropwise addition of solution of liquid NH<sub>3</sub> (30%) at 0 °C. Then the reaction mixture was extracted with CH<sub>2</sub>Cl<sub>2</sub> (3 x 20 mL), dried in vacuum, purified by flash chromatography using hexane-ethylacetate (50:50 to 30:70) to give **Pro-3** (746 mg, 96%) as a white solid. <sup>1</sup>H NMR (400 MHz, DMSO-d<sub>6</sub>): 10.4 (s, 1H), 9.23 (s, 1H), 7.95-7.88 (m, 6H), 7.50 (t, 2H, *J* = 7.8 Hz), 7.38 (t, 1H, *J* = 7.4 Hz), 3.91 (q, 1H, *J* = 5.8 Hz), 3.02 (t, 2H, *J* = 6.8 Hz), 2.21-2.12 (m, 1H), 1.91-1.83 (m, 1H), 1.79-1.72 (m, 2H); <sup>13</sup>C NMR (100 MHz, DMSO-d<sub>6</sub>): 172.0, 147.2, 138.7, 132.1, 130.3, 128.9, 128.2, 125.3, 120.6, 120.2, 119.4, 60.6, 46.5, 30.2, 25.2; HRMS (ESI) calcd for C<sub>19</sub>H<sub>20</sub>N<sub>5</sub>O (M+H)<sup>+</sup>: 334.1667; found, 334.1693.

#### **4.0 General procedure for cycloaddition of aromatic azides and aromatic alkynes (GP-1)**

In a small reaction vial, **Pro-1** (0.1 mmol, 0.1 equiv), aromatic azide (1 equiv), aromatic alkyne (1.5 equiv) and water (0.2 M) were taken. Then, copper iodide (0.05 equiv) was added and the resulting heterogeneous reaction mixture was stirred at rt. The completion of reaction was monitored by TLC analysis. The reaction mixture was extracted with ethyl acetate (3 x 2 mL), dried over Na<sub>2</sub>SO<sub>4</sub>, filtered and concentrated under vacuum. In all examples, the crude products were found to be pure by <sup>1</sup>H and <sup>13</sup>C NMR.

#### **5.0 General procedure for cycloaddition of aliphatic/heteroaromatic azides and nucleobase derived azides with alkynes (GP-2)**

In a small reaction vial, **Pro-1** (0.1 equiv), azide (1 equiv), alkyne (1.5 equiv) and water (2.0 mL, 0.2 M) were taken. Then, copper iodide (0.05 equiv) was added and the resulting heterogeneous reaction mixture was stirred at rt. The completion of reaction was monitored by TLC analysis. The reaction mixture was extracted with ethyl acetate (3 x 2 mL), dried over Na<sub>2</sub>SO<sub>4</sub>, filtered and concentrated under vacuum. In all examples, the crude products were found to be pure by <sup>1</sup>H and <sup>13</sup>C NMR.

### **6.0 General procedure for the synthesis of triazoles from alkyl halides (GP-3)**

In a small reaction vial, sodium azide (1.2 equiv), alkyl bromide (1.0 equiv), **Pro-1** (0.1 equiv), alkyne (1.5 equiv) and water (2.0 mL, 0.2 M) were taken. Then, copper iodide (0.05 equiv) was added and the resulting heterogeneous reaction mixture was stirred at rt. The completion of reaction was monitored by TLC analysis. The reaction mixture was extracted with ethyl acetate (3 x 2 mL), dried over Na<sub>2</sub>SO<sub>4</sub>, filtered and concentrated under vacuum. In all examples, the crude products were found to be pure by <sup>1</sup>H and <sup>13</sup>C NMR.

### **7.0 General procedure for a relay Ullmann-CuAAC sequence (GP-4)**

In a small reaction vial, catalyst **Pro-1** (0.3 equiv), azide (1 equiv), alkyne (1.5 equiv) and water (2.0 mL, 0.2 M) were taken. Then, copper iodide (0.15 equiv), aromatic iodide (1.5 equiv) were added and the reaction mixture was heated in a pre-heated oil bath with stirring at 100 °C for 24 h. The completion of reaction was monitored by TLC analysis. The reaction mixture was extracted with ethyl acetate (3 x 2 mL), dried over Na<sub>2</sub>SO<sub>4</sub>, filtered and concentrated under vacuum. The crude product was then purified by flash chromatography on 100-200 mesh silica gel using hexane-ethyl acetate (95:05-80:20) as eluent to provide the corresponding products.

### **8.0 Gram scale experiment**

#### **Preparation of 1-(4-methoxyphenyl)-4-phenyl-1H-1,2,3-triazole (**3a**):**

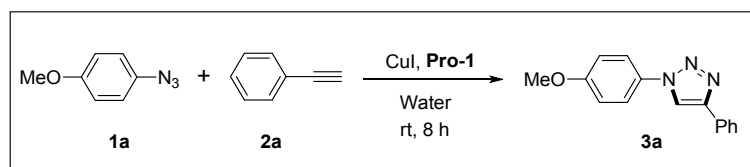

#### **Scheme S6. Gram scale synthesis of **3a**.**

To a suspension of 1-azido-4-methoxybenzene **1a** (1.00 g, 6.70 mmol, 1 equiv), phenylacetylene **2a** (1.54 g, 10.05 mmol, 1.5 equiv) in water (0.2 M), were added copper iodide (64.30 mg, 0.34 mmol, 0.05 equiv) and **Pro-1** (223 mg, 0.67 mmol, 0.1 equiv). The reaction mixture was stirred at rt (Scheme S6). After the completion of reaction, the reaction mixture was extracted with ethyl acetate (3 x 2 mL), dried over Na<sub>2</sub>SO<sub>4</sub>, filtered and concentrated under vacuum. The crude compound **3a** (1.48 g, 88%) was obtained in pure form and analyzed by <sup>1</sup>H and <sup>13</sup>C NMR.

#### **Preparation of 1-benzyl-4-(3-fluorophenyl)-1H-1,2,3-triazole (**6c**):**

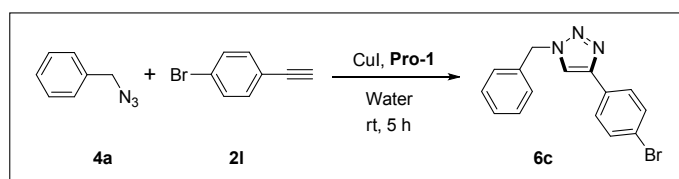

#### **Scheme S7. Gram scale synthesis of **6c**.**

To a stirring suspension of benzyl azide **4a** (1.00 g, 7.51 mmol, 1 equiv), 1-ethynyl-4-bromobenzene **2l** (2.06 g, 11.36 mmol, 1.5 equiv) in water, copper iodide (71.3 mg, 0.37 mmol, 0.05 equiv) and **Pro-1** (250 mg, 0.75 mmol, 0.1 equiv) were added and the reaction mixture was stirred at rt (Scheme S7). After the completion of reaction, as monitored by TLC analysis, the reaction mixture was extracted with ethyl acetate (3 x 2 mL), dried over Na<sub>2</sub>SO<sub>4</sub>, filtered and concentrated under vacuum. The crude compound **6c** (2.12 g, 90%) was obtained in pure form and analysed by <sup>1</sup>H and <sup>13</sup>C NMR.

## 9.0 Control experiment using Cu acetylide:

### Preparation of copper acetylide **S12**:

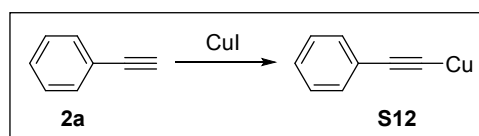

### Scheme S8. Synthesis of copper acetylide.

Phenylacetylene **2a** was added dropwise to a solution of copper iodide (2.0 mmol) in the mixture of ammonium hydroxide (28% NH<sub>3</sub> solution, 20 mL) and ethanol (12 mL). The reaction mixture was stirred overnight at room temperature under argon atmosphere. The yellow precipitate was filtered and washed with ammonium hydroxide (10% NH<sub>3</sub> solution, 3x10 mL), water (3x10 mL), ethanol (3x10 mL) and diethyl ether (3x10 mL). The yellow solid was dried overnight to provide the desired copper acetylide **S1** which was used without further purification.<sup>4</sup>

### Table S5. Control experiment with Cu acetylide.

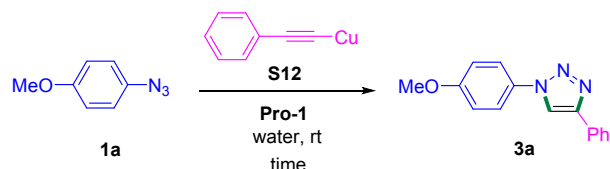

| entry | time (h) | yield of <b>3a</b> (%) <sup>a</sup> |
|-------|----------|-------------------------------------|
| 1     | 8        | 50                                  |
| 2     | 10       | 65                                  |
| 3     | 12       | 70                                  |

<sup>a</sup>yield refers to the isolated yield

<sup>4</sup> K. Jouvin, J. Heimburger, G. Evano, *Chem. Sci.*, 2012, **3**, 756-760.



It was observed when the cycloaddition was performed using Cu acetylide **S12** and **Pro-1** for 8h, the yield of **3a** was lower (50%, table S5) compared to the yield of **3a** when the reaction was carried out in the presence of CuI, phenyl acetylene **2a** and **Pro-1**. Even after longer reaction time i.e. 12 h, the yield obtained was 70%. These observations suggest that the binuclear pathway is kinetically more favoured than the mononuclear pathway for our developed CuAAC process.

### **10.0 General information on computational methods**

All the DFT calculations were performed using the Gaussian G16 suit of program.<sup>5</sup> Geometry optimization and structural properties calculations were carried out using the M06-L functional<sup>6</sup> (reported to be appropriate for Cu complexes)<sup>7,8</sup> combined with the relativistic effective core potential (ECP),<sup>9</sup> LANL2DZ basis set for the Cu atoms,<sup>10</sup> whereas the Pople's split basis, 6-31+G\*, was used for the anchoring C, N, O and H atoms.<sup>11</sup> Single Point energy calculations with larger and better basis set: SDD and Def2-TZVP for the Cu atoms and 6-31+G\*\* for the anchoring C, N, O, H atoms were also performed (Figure S3). To mimic experimental condition, the conductor-like polarizable continuum model (CPCM) was applied in the calculations with water, DMSO and benzene as solvent for the accurate determination of the activation energy barriers for the transition states (TS). All reported TS structures were confirmed to have only one imaginary frequency which belongs to the reaction coordinate. Intrinsic Reaction Coordinate<sup>12-13</sup> (IRC) calculations were performed to determine adjacent intermediates of the TS. Every reported energy in this study are free energies at 298 K.

### **11.0 Free energy profile for mononuclear and binuclear CuAAC reaction pathway**

<sup>5</sup> M. J. Frisch, G. W. Trucks, H. B. Schlegel, G. E. Scuseria, M. A. Robb, J. R. Cheeseman, G. Scalmani, V. Barone, G. A. Petersson, H. Nakatsuji, X. Li, M. Caricato, A. V. Marenich, J. Bloino, B. G. Janesko, R. Gomperts, B. Mennucci, H. P. Hratchian, J. V. Ortiz, A. F. Izmaylov, J. L. Sonnenberg, D. Williams-Young, F. Ding, F. Lipparini, F. Egidi, J. Goings, B. Peng, A. Petrone, T. Henderson, D. Ranasinghe, V. G. Zakrzewski, J. Gao, N. Rega, G. Zheng, W. Liang, M. Hada, M. Ehara, K. Toyota, R. Fukuda, J. Hasegawa, M. Ishida, T. Nakajima, Y. Honda, O. Kitao, H. Nakai, T. Vreven, K. Throssell, J. A., Jr. Montgomery, J. E. Peralta, F. Ogliaro, M. J. Bearpark, J. J. Heyd, E. N. Brothers, K. N. Kudin, V. N. Staroverov, T. A. Keith, R. Kobayashi, J. Normand, K. Raghavachari, A. P. Rendell, J. C. Burant, S. S. Iyengar, J. Tomasi, M. Cossi, J. M. Millam, M. Klene, C. Adamo, R. Cammi, J. W. Ochterski, R. L. Martin, K. Morokuma, O. Farkas, J. B. Foresman, D. J. Fox, Gaussian 16, revision C.01; Gaussian, Inc.: Wallingford CT, 2016.

<sup>6</sup> Y. Zhao and D. G. Truhlar, *J. Chem. Phys.*, 2006, **125**, 194101-194118.

<sup>7</sup> A. C. Tsipis, *RSC Adv.*, 2014, **4**, 32504-32529.

<sup>8</sup> Y. Özkılıc and N. Ş. Tüzün, *Organometallics*, 2016, **35**, 2589-2599.

<sup>9</sup> Y. Zhao and D. G., Truhlar *Theor. Chem. Acc.*, 2008, **120**, 215-241.

<sup>10</sup> C. E. Check, T. O. Faust, J. M. Bailey, B. J. Wright, T. M. Gilbert and L. S. Sunderlin, *J. Phys. Chem. A* 2001, **105**, 8111-8116.

<sup>11</sup> A. K. Rappe, C. J. Casewit, K. S. Colwell, W. A. Goddard III, and W. M. Skiff *J. Am. Chem. Soc.*, 1992, **114**, 10024-10035.

<sup>12</sup> C. Gonzalez, H. B. Schlegel, *J. Chem. Phys.*, 1989, **90**, 2154-216

<sup>13</sup> C. Gonzalez, H. B. Schlegel, *J. Phys. Chem.*, 1990, **94**, 5523-5527.

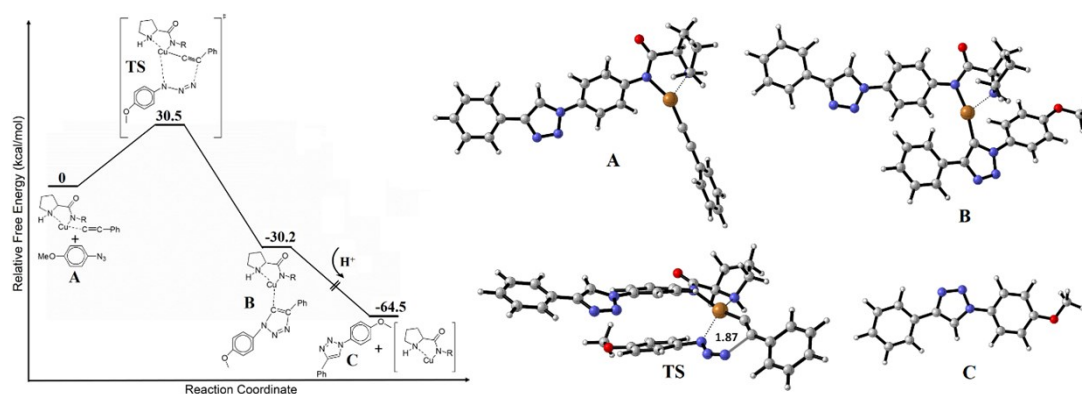

Figure S1: Free energy profile for mononuclear CuAAC reaction pathway and optimized structures of reaction intermediates and transition state.

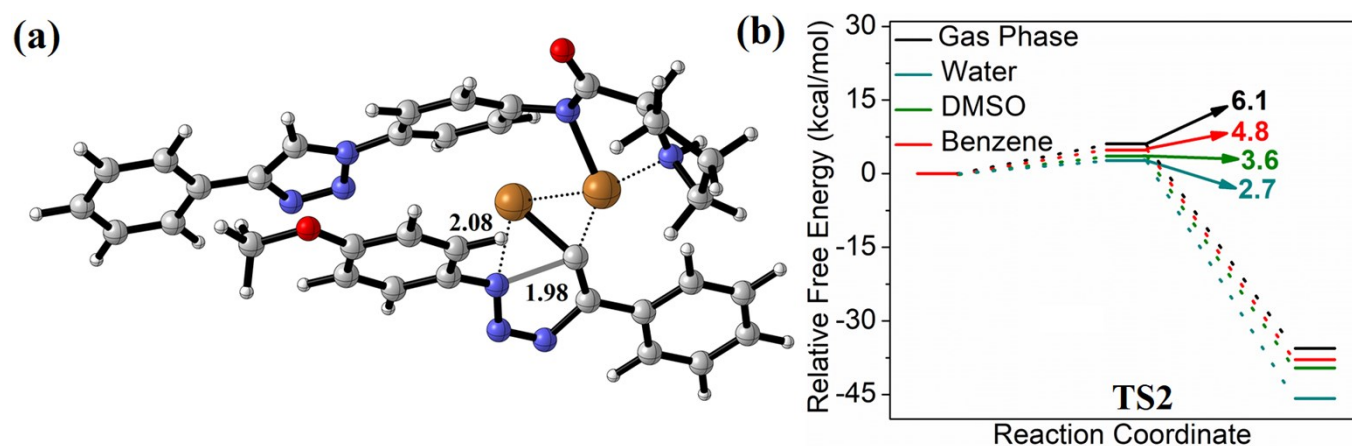

Figure S2: (a) Optimized transition state (TS2) structure of the ring contraction step, (b) Solvent dependent variation of activation energies for TS2.

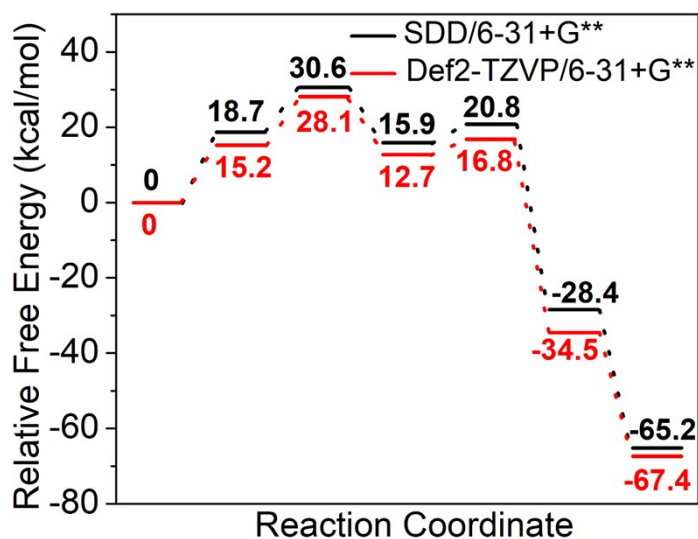

Figure S3. Free energy profile (considering single point energy with better basis sets) for binuclear CuAAC reaction pathway.

## 12.0 Cartesian coordinates of metallacycle intermediates and transition states

**Intermediate-A:**

58

Int-A

|    |              |             |             |
|----|--------------|-------------|-------------|
| Cu | 2.62896960   | 0.20364105  | -0.49903349 |
| N  | 1.61542500   | 1.84745800  | -0.76939100 |
| C  | 2.17364700   | 2.95100000  | -0.20356100 |
| O  | 1.60087300   | 3.94098500  | 0.25427800  |
| C  | 3.71494300   | 2.91976600  | -0.26876500 |
| C  | 4.37677800   | 3.81881900  | 0.79050400  |
| C  | 5.21938400   | 2.87376400  | 1.65604900  |
| H  | 3.58509700   | 4.31346400  | 1.36339500  |
| H  | 4.98262800   | 4.60990200  | 0.33756700  |
| C  | 4.59160000   | 1.51314200  | 1.39738200  |
| H  | 6.26782400   | 2.86486200  | 1.32582600  |
| H  | 5.21859600   | 3.14764700  | 2.71645200  |
| H  | 5.22738000   | 0.64697000  | 1.60991800  |
| H  | 3.66021100   | 1.39387100  | 1.96823300  |
| N  | 4.22903300   | 1.53401400  | -0.04078500 |
| C  | 0.24567300   | 1.66173800  | -0.74183000 |
| C  | -0.30030000  | 0.83337800  | -1.77090400 |
| C  | -0.63308800  | 2.07826900  | 0.27602100  |
| C  | -1.59342100  | 0.28904600  | -1.67160100 |
| H  | 0.29636400   | 0.68091100  | -2.67171500 |
| C  | -1.92724900  | 1.57112000  | 0.35441900  |
| H  | -0.26959100  | 2.75930100  | 1.03720900  |
| C  | -2.40632300  | 0.65923200  | -0.58397000 |
| H  | -2.01650000  | -0.30847400 | -2.47557700 |
| H  | -2.55630700  | 1.85473700  | 1.19680800  |
| N  | -3.69450100  | 0.09927800  | -0.47074500 |
| C  | -4.78888600  | 0.57191300  | 0.17563800  |
| C  | -5.76228700  | -0.38824200 | -0.02698700 |
| H  | -4.79152500  | 1.53091200  | 0.67357600  |
| N  | -3.97049300  | -1.10768300 | -1.04977800 |
| N  | -5.21102700  | -1.38879900 | -0.77985600 |
| C  | -7.14796700  | -0.43204500 | 0.42277100  |
| C  | -7.96171500  | -1.52023000 | 0.07864900  |
| C  | -7.69376700  | 0.59863800  | 1.19967600  |
| C  | -9.28367500  | -1.57213400 | 0.50233500  |
| H  | -7.53618600  | -2.31939100 | -0.52418900 |
| C  | -9.01663200  | 0.54400100  | 1.62101800  |
| H  | -7.07605500  | 1.45230300  | 1.47823800  |
| C  | -9.81777000  | -0.54206300 | 1.27430200  |
| H  | -9.90306700  | -2.42416700 | 0.22740800  |
| H  | -9.42431800  | 1.35359700  | 2.22383900  |
| H  | -10.85389700 | -0.58490300 | 1.60491300  |
| H  | 3.98540500   | 3.20882300  | -1.29206900 |
| H  | 5.09316800   | 1.42834900  | -0.57122200 |
| C  | 5.62983160   | -4.38711790 | 1.34901252  |
| C  | 4.45185160   | -3.75979990 | 0.96559852  |

|    |            |             |             |
|----|------------|-------------|-------------|
| C  | 4.48676160 | -2.51392490 | 0.31312952  |
| C  | 5.73735860 | -1.92735890 | 0.05856052  |
| C  | 6.91304460 | -2.56041190 | 0.44172652  |
| C  | 6.86425960 | -3.79219490 | 1.09128352  |
| H  | 5.58458960 | -5.35055590 | 1.85374652  |
| H  | 3.48685860 | -4.22071790 | 1.16501452  |
| H  | 5.76830560 | -0.96957490 | -0.46156148 |
| H  | 7.87307760 | -2.09275190 | 0.22977852  |
| H  | 7.78452560 | -4.28814990 | 1.39346852  |
| C  | 3.26566860 | -1.87152990 | -0.07394148 |
| C  | 2.03737860 | -1.71681890 | -0.33523748 |
| Cu | 0.37848960 | -1.00087090 | -0.85211248 |

### Intermediate-B:

76

Int-B

|    |             |             |             |
|----|-------------|-------------|-------------|
| Cu | -3.15596375 | -1.06237982 | -0.74764862 |
| N  | -1.87487600 | -2.36304300 | 0.01883000  |
| C  | -2.37026500 | -2.98998200 | 1.11688800  |
| O  | -1.76043500 | -3.58655500 | 2.00629500  |
| C  | -3.90109000 | -2.92236600 | 1.24998600  |
| C  | -4.32202700 | -2.08084200 | 2.47989900  |
| C  | -5.12162900 | -0.91110900 | 1.90702300  |
| H  | -3.45162400 | -1.77069400 | 3.06558200  |
| H  | -4.95329200 | -2.68135800 | 3.14510700  |
| C  | -5.75541400 | -1.52311500 | 0.67435400  |
| H  | -5.85579800 | -0.49913900 | 2.60668100  |
| H  | -4.45562600 | -0.08860700 | 1.60149400  |
| H  | -6.58158400 | -2.19682800 | 0.95762500  |
| H  | -6.13223600 | -0.79156900 | -0.05056300 |
| N  | -4.61837800 | -2.27760600 | 0.10193500  |
| C  | -0.52682200 | -2.14523800 | -0.16625900 |
| C  | -0.12937500 | -1.73594900 | -1.47810700 |
| C  | 0.47595600  | -2.17742200 | 0.83025200  |
| C  | 1.18758900  | -1.36069900 | -1.76428600 |
| H  | -0.83656200 | -1.89353200 | -2.29525300 |
| C  | 1.77356800  | -1.78860700 | 0.53923400  |
| H  | 0.20823300  | -2.49417300 | 1.83156300  |
| C  | 2.13867300  | -1.37971600 | -0.74734800 |
| H  | 1.48184000  | -1.08140600 | -2.77291900 |
| H  | 2.51002400  | -1.75441700 | 1.34155600  |
| N  | 3.45194300  | -0.93906700 | -1.02118400 |
| C  | 4.60339700  | -1.20838000 | -0.36236000 |
| C  | 5.56568900  | -0.44662600 | -1.00209500 |
| H  | 4.64453600  | -1.91604800 | 0.45371900  |
| N  | 3.67767200  | -0.04203200 | -2.02390800 |
| N  | 4.94906100  | 0.24522800  | -2.00715000 |
| C  | 6.98809200  | -0.29617300 | -0.72059900 |
| C  | 7.77284000  | 0.55379100  | -1.51214300 |

|    |             |             |             |
|----|-------------|-------------|-------------|
| C  | 7.59189200  | -0.96662500 | 0.35242000  |
| C  | 9.12410700  | 0.72291700  | -1.23671900 |
| H  | 7.30148100  | 1.07553900  | -2.34219600 |
| C  | 8.94358100  | -0.79462100 | 0.62519900  |
| H  | 6.99590500  | -1.62751300 | 0.98229000  |
| C  | 9.71596800  | 0.05097500  | -0.16866500 |
| H  | 9.72077800  | 1.38569300  | -1.86104300 |
| H  | 9.39609000  | -1.32353000 | 1.46211700  |
| H  | 10.77455900 | 0.18582500  | 0.04517900  |
| H  | -4.24675800 | -3.95782300 | 1.37532800  |
| H  | -4.93362300 | -2.98240700 | -0.55986000 |
| C  | -6.99589300 | 2.71913800  | 0.39635100  |
| C  | -5.63917700 | 2.41286400  | 0.38952700  |
| C  | -5.04317300 | 1.86791500  | -0.75690900 |
| C  | -5.84070600 | 1.65383500  | -1.89723500 |
| C  | -7.19258800 | 1.96698000  | -1.88373600 |
| C  | -7.77813300 | 2.49750200  | -0.73417500 |
| H  | -7.44472300 | 3.13792800  | 1.29532700  |
| H  | -5.03203500 | 2.59027900  | 1.27201700  |
| H  | -5.37656000 | 1.23602400  | -2.78899500 |
| H  | -7.79304100 | 1.79797800  | -2.77585700 |
| H  | -8.83889200 | 2.74107500  | -0.72292300 |
| C  | -3.66125500 | 1.43745900  | -0.80648700 |
| C  | -2.81434000 | 0.76684900  | -1.46521700 |
| Cu | -1.02513100 | 0.25064900  | -1.21238200 |
| N  | -0.64724018 | 1.52740859  | 0.17090520  |
| N  | -1.64089218 | 2.13992459  | 0.71022820  |
| N  | -2.56263667 | 2.70811471  | 1.21052207  |
| C  | 0.61890782  | 1.68729959  | 0.79286020  |
| C  | 1.75556382  | 1.59149559  | -0.00533980 |
| C  | 0.76500682  | 1.88353459  | 2.17240420  |
| C  | 3.02918882  | 1.67582259  | 0.55286220  |
| H  | 1.65230582  | 1.44712559  | -1.08183880 |
| C  | 2.02642982  | 1.98097159  | 2.73144620  |
| H  | -0.12168318 | 1.95674359  | 2.79919020  |
| C  | 3.17015882  | 1.87298059  | 1.92843020  |
| H  | 3.89531382  | 1.60149459  | -0.10002780 |
| H  | 2.15508982  | 2.13422659  | 3.80042920  |
| O  | 4.36090382  | 1.97594859  | 2.57773120  |
| C  | 5.52595682  | 1.75279959  | 1.81004620  |
| H  | 5.63627782  | 2.49192959  | 1.00296120  |
| H  | 6.36734382  | 1.84195259  | 2.50004820  |
| H  | 5.52118782  | 0.74862759  | 1.36358820  |

**Transition state-I (imaginary frequency = -370.40)**

76

TS-I

|    |          |          |          |
|----|----------|----------|----------|
| Cu | -3.18977 | -1.02806 | -0.76787 |
| N  | -1.87488 | -2.36304 | 0.01883  |
| C  | -2.37026 | -2.98998 | 1.11689  |

|   |          |          |          |
|---|----------|----------|----------|
| O | -1.76043 | -3.58656 | 2.00630  |
| C | -3.90109 | -2.92237 | 1.24999  |
| C | -4.32203 | -2.08084 | 2.47990  |
| C | -5.12163 | -0.91111 | 1.90702  |
| H | -3.45162 | -1.77069 | 3.06558  |
| H | -4.95329 | -2.68136 | 3.14511  |
| C | -5.75541 | -1.52311 | 0.67435  |
| H | -5.85580 | -0.49914 | 2.60668  |
| H | -4.45563 | -0.08861 | 1.60149  |
| H | -6.58158 | -2.19683 | 0.95762  |
| H | -6.13224 | -0.79157 | -0.05056 |
| N | -4.61838 | -2.27761 | 0.10193  |
| C | -0.52682 | -2.14524 | -0.16626 |
| C | -0.12937 | -1.73595 | -1.47811 |
| C | 0.47596  | -2.17742 | 0.83025  |
| C | 1.18759  | -1.36070 | -1.76429 |
| H | -0.83656 | -1.89353 | -2.29525 |
| C | 1.77357  | -1.78861 | 0.53923  |
| H | 0.20823  | -2.49417 | 1.83156  |
| C | 2.13867  | -1.37972 | -0.74735 |
| H | 1.48184  | -1.08141 | -2.77292 |
| H | 2.51002  | -1.75442 | 1.34156  |
| N | 3.45194  | -0.93907 | -1.02118 |
| C | 4.60340  | -1.20838 | -0.36236 |
| C | 5.56569  | -0.44663 | -1.00209 |
| H | 4.64454  | -1.91605 | 0.45372  |
| N | 3.67767  | -0.04203 | -2.02391 |
| N | 4.94906  | 0.24523  | -2.00715 |
| C | 6.98809  | -0.29617 | -0.72060 |
| C | 7.77284  | 0.55379  | -1.51214 |
| C | 7.59189  | -0.96662 | 0.35242  |
| C | 9.12411  | 0.72292  | -1.23672 |
| H | 7.30148  | 1.07554  | -2.34220 |
| C | 8.94358  | -0.79462 | 0.62520  |
| H | 6.99590  | -1.62751 | 0.98229  |
| C | 9.71597  | 0.05097  | -0.16867 |
| H | 9.72078  | 1.38569  | -1.86104 |
| H | 9.39609  | -1.32353 | 1.46212  |
| H | 10.77456 | 0.18582  | 0.04518  |
| H | -4.24676 | -3.95782 | 1.37533  |
| H | -4.93362 | -2.98241 | -0.55986 |
| C | -6.99589 | 2.71914  | 0.39635  |
| C | -5.63918 | 2.41286  | 0.38953  |
| C | -5.04317 | 1.86791  | -0.75691 |
| C | -5.84071 | 1.65383  | -1.89724 |
| C | -7.19259 | 1.96698  | -1.88374 |
| C | -7.77813 | 2.49750  | -0.73418 |
| H | -7.44472 | 3.13793  | 1.29533  |
| H | -5.03203 | 2.59028  | 1.27202  |
| H | -5.37656 | 1.23602  | -2.78899 |

|    |          |         |          |
|----|----------|---------|----------|
| H  | -7.79304 | 1.79798 | -2.77586 |
| H  | -8.83889 | 2.74107 | -0.72292 |
| C  | -3.66126 | 1.43746 | -0.80649 |
| C  | -2.81434 | 0.76685 | -1.46522 |
| Cu | -1.02513 | 0.25065 | -1.21238 |
| N  | -0.62433 | 1.60481 | 0.25477  |
| N  | -1.61798 | 2.21733 | 0.79409  |
| N  | -2.79575 | 2.33984 | 0.65057  |
| C  | 0.64182  | 1.76470 | 0.87672  |
| C  | 1.77847  | 1.66890 | 0.07852  |
| C  | 0.78792  | 1.96094 | 2.25627  |
| C  | 3.05210  | 1.75323 | 0.63673  |
| H  | 1.67522  | 1.52453 | -0.99797 |
| C  | 2.04934  | 2.05838 | 2.81531  |
| H  | -0.09877 | 2.03415 | 2.88305  |
| C  | 3.19307  | 1.95039 | 2.01229  |
| H  | 3.91822  | 1.67890 | -0.01616 |
| H  | 2.17800  | 2.21163 | 3.88429  |
| O  | 4.38381  | 2.05335 | 2.66160  |
| C  | 5.54887  | 1.83021 | 1.89391  |
| H  | 5.65919  | 2.56934 | 1.08682  |
| H  | 6.39025  | 1.91936 | 2.58391  |
| H  | 5.54410  | 0.82603 | 1.44745  |

#### Intermediate-C:

76

Int\_C

|    |             |            |             |
|----|-------------|------------|-------------|
| Cu | 3.16049262  | 1.14744799 | -0.51234975 |
| N  | 2.01257000  | 2.66964200 | -0.32528800 |
| C  | 2.55745200  | 3.64028900 | 0.45247000  |
| O  | 1.98739400  | 4.55373400 | 1.04922800  |
| C  | 4.09865500  | 3.57739300 | 0.52600700  |
| C  | 4.59178900  | 3.72963200 | 1.96620900  |
| C  | 4.83319600  | 2.29031700 | 2.40383800  |
| H  | 3.85598500  | 4.27381600 | 2.56418500  |
| H  | 5.53519700  | 4.29033200 | 1.99512500  |
| C  | 5.48144400  | 1.69207900 | 1.17129100  |
| H  | 5.46068500  | 2.19826200 | 3.29531100  |
| H  | 3.87967700  | 1.78293200 | 2.61161000  |
| H  | 6.53061000  | 2.01610800 | 1.09656700  |
| H  | 5.45525000  | 0.59780200 | 1.12535600  |
| N  | 4.68003300  | 2.26931000 | 0.05272900  |
| C  | 0.65103200  | 2.47827300 | -0.46002000 |
| C  | 0.24547700  | 1.58533400 | -1.49587600 |
| C  | -0.36313400 | 3.00846600 | 0.36269900  |
| C  | -1.08776100 | 1.22136400 | -1.67819800 |
| H  | 0.97702600  | 1.34597800 | -2.27357500 |
| C  | -1.68358800 | 2.61450400 | 0.19538600  |
| H  | -0.09566700 | 3.72333600 | 1.13202900  |
| C  | -2.05651800 | 1.70876800 | -0.80137600 |

|    |              |             |             |
|----|--------------|-------------|-------------|
| H  | -1.38241500  | 0.58730300  | -2.50961900 |
| H  | -2.43863300  | 3.03161800  | 0.85927100  |
| N  | -3.39802300  | 1.28710400  | -0.94605400 |
| C  | -4.45639500  | 1.47401700  | -0.12035600 |
| C  | -5.50860500  | 0.82192200  | -0.73631700 |
| H  | -4.37600500  | 2.01412300  | 0.81156800  |
| N  | -3.76991900  | 0.54555300  | -2.02910800 |
| N  | -5.03560800  | 0.26926100  | -1.89458400 |
| C  | -6.88745300  | 0.63729600  | -0.30040200 |
| C  | -7.76369900  | -0.14402500 | -1.06659500 |
| C  | -7.34976800  | 1.18679900  | 0.90328700  |
| C  | -9.06421000  | -0.37161200 | -0.63378600 |
| H  | -7.40163900  | -0.57208700 | -1.99903600 |
| C  | -8.65094900  | 0.95672700  | 1.33304800  |
| H  | -6.68196300  | 1.79565300  | 1.51271500  |
| C  | -9.51333700  | 0.17443400  | 0.56739700  |
| H  | -9.73271500  | -0.98212000 | -1.23822000 |
| H  | -8.99297600  | 1.38912600  | 2.27156600  |
| H  | -10.53165300 | -0.00773000 | 0.90543200  |
| H  | 4.47026900   | 4.39030600  | -0.11123300 |
| H  | 5.27288600   | 2.42385000  | -0.75816900 |
| C  | 6.73642100   | -3.90130700 | 0.10445100  |
| C  | 5.37670200   | -3.60623700 | 0.11490600  |
| C  | 4.91374600   | -2.37946900 | -0.37462600 |
| C  | 5.84821000   | -1.46321700 | -0.88169900 |
| C  | 7.20487100   | -1.75908700 | -0.88695300 |
| C  | 7.65675900   | -2.98187100 | -0.39187300 |
| H  | 7.07873300   | -4.86047400 | 0.48948800  |
| H  | 4.65579200   | -4.32170500 | 0.50081700  |
| H  | 5.48879200   | -0.51698500 | -1.28843700 |
| H  | 7.91406700   | -1.03757400 | -1.29042900 |
| H  | 8.71950000   | -3.21738100 | -0.39925700 |
| C  | 3.47446700   | -2.04192600 | -0.34200800 |
| C  | 2.99982600   | -0.81597000 | -0.52106900 |
| Cu | 1.12790800   | -0.37014400 | -0.65749300 |
| N  | 0.60808200   | -2.16904700 | -0.11221300 |
| N  | 1.41740200   | -3.17925200 | 0.08982100  |
| N  | 2.65885800   | -3.20066100 | -0.04629800 |
| C  | -0.71955100  | -2.39010400 | 0.34305800  |
| C  | -1.78953800  | -1.82758700 | -0.35079600 |
| C  | -0.98270000  | -3.13887500 | 1.50094100  |
| C  | -3.09848400  | -1.97798600 | 0.09870500  |
| H  | -1.60461700  | -1.28717100 | -1.27787900 |
| C  | -2.28094800  | -3.31066600 | 1.94338600  |
| H  | -0.15079700  | -3.58574500 | 2.03988300  |
| C  | -3.35056900  | -2.72398400 | 1.25281000  |
| H  | -3.90775800  | -1.53933600 | -0.47795500 |
| H  | -2.49624100  | -3.89120300 | 2.83758600  |
| O  | -4.58627300  | -2.93878000 | 1.77579100  |
| C  | -5.66113800  | -2.25915500 | 1.15847500  |



|   |             |             |            |
|---|-------------|-------------|------------|
| H | -5.79670400 | -2.56969800 | 0.11201300 |
| H | -6.55618400 | -2.51308400 | 1.73065600 |
| H | -5.50761600 | -1.17142000 | 1.18287100 |

**Transition State-II (imaginary frequency = -270.19)**

76

TS-II

|    |              |             |             |
|----|--------------|-------------|-------------|
| Cu | 2.98600100   | 0.64159400  | -0.26654500 |
| N  | 2.06118300   | 2.17081100  | -1.27148800 |
| C  | 2.47958600   | 3.39960800  | -0.87027500 |
| O  | 1.86233700   | 4.46632400  | -0.87830700 |
| C  | 3.93162700   | 3.41639400  | -0.38089500 |
| C  | 4.09771800   | 4.17499000  | 0.93432200  |
| C  | 5.39138500   | 3.61133000  | 1.50236000  |
| H  | 3.25414500   | 3.94597800  | 1.60197300  |
| H  | 4.09803100   | 5.25629400  | 0.77829300  |
| C  | 5.24607600   | 2.12868800  | 1.19570900  |
| H  | 6.25752600   | 4.03180400  | 0.97185900  |
| H  | 5.52721000   | 3.81058500  | 2.57067900  |
| H  | 6.18995700   | 1.57671600  | 1.13249700  |
| H  | 4.63062800   | 1.63514300  | 1.95888100  |
| N  | 4.52533300   | 2.05925800  | -0.11108900 |
| C  | 0.73173900   | 1.90004000  | -1.52492100 |
| C  | 0.45958300   | 0.68886300  | -2.24414500 |
| C  | -0.37541100  | 2.59342300  | -1.00255400 |
| C  | -0.81652400  | 0.10184500  | -2.23516700 |
| H  | 1.24556100   | 0.28811500  | -2.88820500 |
| C  | -1.63717700  | 2.00939300  | -0.99864300 |
| H  | -0.21460400  | 3.55022700  | -0.51797400 |
| C  | -1.85977900  | 0.75124000  | -1.55587300 |
| H  | -1.02187800  | -0.80697800 | -2.79541400 |
| H  | -2.44588700  | 2.51779900  | -0.47511200 |
| N  | -3.10710300  | 0.10651600  | -1.42405000 |
| C  | -4.30254400  | 0.61238200  | -1.03571300 |
| C  | -5.14759500  | -0.48085500 | -0.97464400 |
| H  | -4.45343000  | 1.66826800  | -0.86004800 |
| N  | -3.19671200  | -1.24624700 | -1.58731700 |
| N  | -4.42341600  | -1.58839300 | -1.31906600 |
| C  | -6.55494100  | -0.56057500 | -0.60348800 |
| C  | -7.19870700  | -1.80515400 | -0.55715100 |
| C  | -7.28719400  | 0.58936400  | -0.27430700 |
| C  | -8.53568700  | -1.89267900 | -0.19003300 |
| H  | -6.62985200  | -2.69586400 | -0.81477700 |
| C  | -8.62419400  | 0.49776500  | 0.09341100  |
| H  | -6.80493900  | 1.56676200  | -0.31058900 |
| C  | -9.25433500  | -0.74427400 | 0.13787500  |
| H  | -9.02164800  | -2.86629700 | -0.15926400 |
| H  | -9.17781800  | 1.40111100  | 0.34339700  |
| H  | -10.30159600 | -0.81612900 | 0.42517000  |
| H  | 4.53154900   | 3.91424100  | -1.15766300 |

|    |             |             |             |
|----|-------------|-------------|-------------|
| H  | 5.19649200  | 1.85148300  | -0.84563000 |
| C  | 5.69014100  | -4.84799700 | -0.01049100 |
| C  | 4.42142300  | -4.33572000 | 0.23573700  |
| C  | 4.19151500  | -2.95296900 | 0.19411900  |
| C  | 5.27142500  | -2.10386500 | -0.09598500 |
| C  | 6.53702400  | -2.61942700 | -0.34046400 |
| C  | 6.75321800  | -3.99629200 | -0.30043800 |
| H  | 5.84907800  | -5.92448600 | 0.02475000  |
| H  | 3.59005300  | -4.99627400 | 0.46648000  |
| H  | 5.10356400  | -1.02548900 | -0.11741500 |
| H  | 7.36262100  | -1.94400500 | -0.56065400 |
| H  | 7.74521200  | -4.40102900 | -0.49282000 |
| C  | 2.85039300  | -2.41659300 | 0.44933700  |
| C  | 2.48271400  | -1.12027500 | 0.29219100  |
| Cu | 0.92195406  | -0.60386900 | -0.87457509 |
| N  | 0.67085800  | -1.58087200 | 0.94444000  |
| N  | 0.78073400  | -2.84880100 | 1.20677000  |
| N  | 1.88164700  | -3.37443200 | 0.93862700  |
| C  | -0.44797200 | -0.84727500 | 1.44003700  |
| C  | -1.72872000 | -1.40377600 | 1.45982100  |
| C  | -0.26056200 | 0.48825600  | 1.81518900  |
| C  | -2.81720300 | -0.63293400 | 1.85043300  |
| H  | -1.86890700 | -2.43458800 | 1.14525800  |
| C  | -1.34689900 | 1.26021300  | 2.19240000  |
| H  | 0.74552100  | 0.90936900  | 1.79903200  |
| C  | -2.63374500 | 0.71023000  | 2.19959900  |
| H  | -3.80849900 | -1.07889100 | 1.83843900  |
| H  | -1.22268600 | 2.30364700  | 2.47315800  |
| O  | -3.64035100 | 1.56147300  | 2.53478000  |
| C  | -4.93883000 | 1.00926500  | 2.63652300  |
| H  | -4.97824100 | 0.21634600  | 3.39654000  |
| H  | -5.59303000 | 1.83124600  | 2.93387100  |
| H  | -5.28350700 | 0.59730900  | 1.67716800  |

### Intermediate-D

76

Int\_D

|    |             |             |             |
|----|-------------|-------------|-------------|
| Cu | -2.48508684 | -0.38927897 | 0.07946583  |
| N  | -2.52442300 | -2.10538700 | -0.89294700 |
| C  | -3.09961100 | -3.07212100 | -0.12709600 |
| O  | -2.69444100 | -4.21470300 | 0.09277300  |
| C  | -4.42771300 | -2.56142100 | 0.48419700  |
| C  | -5.03469800 | -3.53654800 | 1.49935100  |
| C  | -4.80557700 | -2.88949200 | 2.87644900  |
| H  | -4.51447800 | -4.49530700 | 1.40555600  |
| H  | -6.09843400 | -3.71109900 | 1.30868600  |
| C  | -3.79424600 | -1.78507200 | 2.59714900  |
| H  | -5.73485900 | -2.45026700 | 3.26380100  |
| H  | -4.44958900 | -3.60082400 | 3.62891200  |
| H  | -3.80239400 | -0.95189100 | 3.30652000  |

|    |             |             |             |
|----|-------------|-------------|-------------|
| H  | -2.77191200 | -2.18679900 | 2.55738600  |
| N  | -4.12769300 | -1.29881400 | 1.23690200  |
| C  | -1.19855400 | -2.17167200 | -1.25170200 |
| C  | -0.78370900 | -1.30255700 | -2.31487300 |
| C  | -0.17460400 | -2.84398400 | -0.54641000 |
| C  | 0.55446400  | -0.88686600 | -2.43686300 |
| H  | -1.53866000 | -0.97312200 | -3.03004200 |
| C  | 1.15000400  | -2.44656800 | -0.68242600 |
| H  | -0.44873700 | -3.59829800 | 0.18366500  |
| C  | 1.51700400  | -1.42589500 | -1.55985000 |
| H  | 0.86926500  | -0.22259800 | -3.23867800 |
| H  | 1.90324900  | -2.88827200 | -0.03088200 |
| N  | 2.80632800  | -0.86217600 | -1.52243400 |
| C  | 3.96157700  | -1.37833800 | -1.03877900 |
| C  | 4.86800600  | -0.33706500 | -1.10108800 |
| H  | 4.05043200  | -2.41366600 | -0.74149300 |
| N  | 2.97805200  | 0.45333300  | -1.85753200 |
| N  | 4.22072500  | 0.75355900  | -1.61029900 |
| C  | 6.26504000  | -0.28743600 | -0.69293300 |
| C  | 7.06303800  | 0.80888400  | -1.04825100 |
| C  | 6.82688400  | -1.30671300 | 0.08772600  |
| C  | 8.38618400  | 0.88158300  | -0.62985700 |
| H  | 6.62199500  | 1.60100900  | -1.65017700 |
| C  | 8.15273200  | -1.23468300 | 0.49869800  |
| H  | 6.20966000  | -2.15007100 | 0.39700000  |
| C  | 8.93782600  | -0.13884500 | 0.14337500  |
| H  | 8.99362600  | 1.73981500  | -0.91217800 |
| H  | 8.57328700  | -2.03379300 | 1.10674700  |
| H  | 9.97494900  | -0.08086900 | 0.46840500  |
| H  | -5.10207100 | -2.30167600 | -0.34066300 |
| H  | -4.99024700 | -0.75721800 | 1.30427800  |
| C  | -6.24210400 | 3.31116500  | -0.84567400 |
| C  | -5.01001800 | 3.37645700  | -0.20476200 |
| C  | -3.99126500 | 2.46695600  | -0.52190800 |
| C  | -4.24207200 | 1.50298100  | -1.51377500 |
| C  | -5.47802600 | 1.43433900  | -2.14664100 |
| C  | -6.48630200 | 2.33762300  | -1.81296800 |
| H  | -7.02112800 | 4.02567100  | -0.58476600 |
| H  | -4.81510900 | 4.12893700  | 0.55627500  |
| H  | -3.44955200 | 0.80831800  | -1.80700600 |
| H  | -5.64866500 | 0.67925200  | -2.91228500 |
| H  | -7.45334100 | 2.28725900  | -2.30991400 |
| C  | -2.71574100 | 2.51361900  | 0.19063000  |
| C  | -1.67708700 | 1.56449400  | 0.18334500  |
| Cu | -0.18603489 | 0.41102143  | -0.27476486 |
| N  | -0.79559400 | 2.13410900  | 1.08425800  |
| N  | -1.24353000 | 3.31601200  | 1.57578700  |
| N  | -2.41765400 | 3.53174200  | 1.04741600  |
| C  | 0.51184400  | 1.68199200  | 1.39756200  |
| C  | 1.53201600  | 2.60570400  | 1.60831800  |

|   |             |             |            |
|---|-------------|-------------|------------|
| C | 0.79329000  | 0.31154300  | 1.44732600 |
| C | 2.83217000  | 2.17334200  | 1.84368600 |
| H | 1.29932500  | 3.66626700  | 1.56793000 |
| C | 2.08982700  | -0.12037400 | 1.67604400 |
| H | -0.01068900 | -0.41613600 | 1.31708400 |
| C | 3.12395900  | 0.80539100  | 1.86295100 |
| H | 3.61620500  | 2.91115200  | 1.98482400 |
| H | 2.32612000  | -1.18150200 | 1.71905100 |
| O | 4.36164600  | 0.28410800  | 2.05375300 |
| C | 5.42972900  | 1.20433500  | 2.19060300 |
| H | 5.30540000  | 1.82771100  | 3.08751800 |
| H | 6.33586500  | 0.60184400  | 2.28021300 |
| H | 5.51395700  | 1.84945800  | 1.30482700 |

**Product (E):**

32

product

|   |             |             |             |
|---|-------------|-------------|-------------|
| C | -5.68235900 | -0.70795600 | -0.01460900 |
| C | -4.33079700 | -1.02247100 | -0.07976400 |
| C | -3.36161700 | -0.01418500 | 0.01403300  |
| C | -3.78370400 | 1.31248200  | 0.17427300  |
| C | -5.13622200 | 1.62359300  | 0.23995900  |
| C | -6.09225500 | 0.61438300  | 0.14568200  |
| H | -6.42302700 | -1.50242800 | -0.08930500 |
| H | -4.00158200 | -2.05169400 | -0.20448200 |
| H | -3.04475100 | 2.11050700  | 0.24651300  |
| H | -5.44567800 | 2.65992500  | 0.36453800  |
| H | -7.15190100 | 0.85800200  | 0.19661400  |
| C | -1.94590200 | -0.35471600 | -0.05491700 |
| C | -0.82849200 | 0.45229500  | 0.03718700  |
| N | 0.22395000  | -0.39344800 | -0.08882200 |
| N | -0.21603500 | -1.67526000 | -0.25462600 |
| N | -1.51604400 | -1.64211600 | -0.23099500 |
| C | 1.60873600  | -0.10487700 | -0.07074000 |
| C | 2.51752800  | -1.11406200 | 0.23652200  |
| C | 2.06708000  | 1.18285300  | -0.36210800 |
| C | 3.88101600  | -0.84286200 | 0.25563600  |
| H | 2.14664400  | -2.11086600 | 0.45659700  |
| C | 3.42297300  | 1.45795200  | -0.33102800 |
| H | 1.36477300  | 1.96782600  | -0.63456200 |
| C | 4.34154300  | 0.44772200  | -0.02231400 |
| H | 4.57475600  | -1.64294400 | 0.49731400  |
| H | 3.79816900  | 2.45267200  | -0.55736800 |
| O | 5.64816400  | 0.81786200  | -0.02103200 |
| C | 6.59972500  | -0.18390300 | 0.27457900  |
| H | 6.56160300  | -1.00440500 | -0.45598300 |
| H | 7.57476100  | 0.30349900  | 0.22156600  |
| H | 6.45210700  | -0.59551900 | 1.28317600  |
| H | -0.69779000 | 1.51082600  | 0.21040400  |

**Transition state-I with explicit solvent model  
(Imaginary frequency = -217.09)**

79

TS-I-H<sub>2</sub>O

|    |          |          |          |
|----|----------|----------|----------|
| Cu | -2.86774 | -1.18485 | -0.63247 |
| N  | -1.90837 | -2.86932 | -0.32659 |
| C  | -2.50756 | -3.67424 | 0.59124  |
| O  | -1.97851 | -4.52915 | 1.30318  |
| C  | -4.01727 | -3.46577 | 0.72009  |
| C  | -4.42148 | -3.09868 | 2.14578  |
| C  | -5.79803 | -2.47892 | 1.95994  |
| H  | -3.71742 | -2.35313 | 2.54621  |
| H  | -4.39144 | -3.96682 | 2.80858  |
| C  | -5.60557 | -1.63201 | 0.70876  |
| H  | -6.54485 | -3.26616 | 1.78479  |
| H  | -6.13453 | -1.88749 | 2.81799  |
| H  | -6.51797 | -1.48822 | 0.11929  |
| H  | -5.22354 | -0.63398 | 0.96244  |
| N  | -4.56932 | -2.34325 | -0.09942 |
| C  | -0.51831 | -2.80186 | -0.37002 |
| C  | 0.12204  | -2.72046 | -1.62138 |
| C  | 0.27658  | -2.67369 | 0.78663  |
| C  | 1.47465  | -2.41995 | -1.72443 |
| H  | -0.47633 | -2.87866 | -2.51764 |
| C  | 1.61552  | -2.32701 | 0.69169  |
| H  | -0.19269 | -2.77875 | 1.76044  |
| C  | 2.20926  | -2.16817 | -0.56208 |
| H  | 1.96857  | -2.35423 | -2.69237 |
| H  | 2.19159  | -2.12026 | 1.59346  |
| N  | 3.51955  | -1.64829 | -0.67307 |
| C  | 4.58082  | -1.78658 | 0.15604  |
| C  | 5.55816  | -0.96482 | -0.37856 |
| H  | 4.56351  | -2.46885 | 0.99450  |
| N  | 3.80901  | -0.76577 | -1.67420 |
| N  | 5.03759  | -0.36996 | -1.49483 |
| C  | 6.90954  | -0.67792 | 0.08701  |
| C  | 7.78840  | 0.05388  | -0.72432 |
| C  | 7.34476  | -1.08976 | 1.35397  |
| C  | 9.06468  | 0.36853  | -0.27422 |
| H  | 7.44910  | 0.37131  | -1.70845 |
| C  | 8.62351  | -0.77682 | 1.79906  |
| H  | 6.66975  | -1.64822 | 2.00236  |
| C  | 9.48791  | -0.04410 | 0.98809  |
| H  | 9.73588  | 0.93780  | -0.91490 |
| H  | 8.94468  | -1.10129 | 2.78712  |
| H  | 10.48779 | 0.20381  | 1.33898  |
| H  | -4.50963 | -4.41086 | 0.44321  |
| H  | -4.98146 | -2.71486 | -0.94986 |
| C  | -6.93341 | 3.56080  | 0.90546  |

|    |          |          |          |
|----|----------|----------|----------|
| C  | -5.61179 | 3.13135  | 0.87032  |
| C  | -5.19663 | 2.18985  | -0.08452 |
| C  | -6.14746 | 1.69910  | -1.00170 |
| C  | -7.46464 | 2.13394  | -0.96010 |
| C  | -7.86481 | 3.06847  | -0.00554 |
| H  | -7.23836 | 4.28929  | 1.65480  |
| H  | -4.88981 | 3.51971  | 1.58176  |
| H  | -5.82564 | 0.97227  | -1.74657 |
| H  | -8.18296 | 1.74551  | -1.68038 |
| H  | -8.89724 | 3.41176  | 0.02585  |
| C  | -3.85970 | 1.66175  | -0.15495 |
| C  | -3.11584 | 0.70082  | -0.53296 |
| Cu | -1.25273 | 0.63293  | -0.94264 |
| N  | -0.65056 | 2.18962  | 0.24126  |
| N  | -1.54962 | 3.00503  | 0.67010  |
| N  | -2.72708 | 3.13064  | 0.69916  |
| C  | 0.70529  | 2.55842  | 0.41132  |
| C  | 1.64981  | 1.52975  | 0.46316  |
| C  | 1.14796  | 3.88729  | 0.46911  |
| C  | 3.01416  | 1.80751  | 0.52404  |
| H  | 1.30609  | 0.49328  | 0.47815  |
| C  | 2.49980  | 4.16791  | 0.55769  |
| H  | 0.41925  | 4.69510  | 0.43892  |
| C  | 3.44848  | 3.13502  | 0.56621  |
| H  | 3.72567  | 0.98573  | 0.54889  |
| H  | 2.85464  | 5.19512  | 0.59935  |
| O  | 4.74789  | 3.51982  | 0.61984  |
| C  | 5.72061  | 2.49773  | 0.49311  |
| H  | 5.58863  | 1.93610  | -0.44277 |
| H  | 6.68976  | 3.00029  | 0.48982  |
| H  | 5.68415  | 1.79314  | 1.33784  |
| O  | 0.38867  | 0.45836  | -2.09752 |
| H  | 0.72720  | -0.45814 | -2.13784 |
| H  | 1.14160  | 0.98391  | -1.77007 |

**Transition State for mononuclear pathway: (imaginary frequency = -355.28)**

75

TS

|   |         |          |          |
|---|---------|----------|----------|
| N | 1.47335 | -1.87015 | -0.89130 |
| C | 1.71779 | -3.20837 | -0.89954 |
| O | 0.93512 | -4.11943 | -1.17172 |
| C | 3.16208 | -3.58419 | -0.53996 |
| C | 3.76829 | -4.58096 | -1.55310 |
| C | 4.99534 | -3.86192 | -2.12756 |
| H | 3.02219 | -4.80818 | -2.32172 |
| H | 4.03197 | -5.53306 | -1.08249 |
| C | 4.70797 | -2.39389 | -1.84887 |
| H | 5.91048 | -4.16651 | -1.60147 |
| H | 5.15085 | -4.06740 | -3.19179 |
| H | 5.57890 | -1.73256 | -1.83108 |

|    |           |          |          |
|----|-----------|----------|----------|
| H  | 3.98644   | -1.98684 | -2.56989 |
| N  | 4.04845   | -2.39627 | -0.52414 |
| C  | 0.19087   | -1.34842 | -1.02040 |
| C  | 0.09053   | 0.02384  | -1.33566 |
| C  | -1.00118  | -2.05236 | -0.75189 |
| C  | -1.12244  | 0.68757  | -1.31837 |
| H  | 1.00532   | 0.57153  | -1.57000 |
| C  | -2.21683  | -1.39063 | -0.73029 |
| H  | -0.95197  | -3.11120 | -0.52700 |
| C  | -2.28105  | -0.02050 | -0.99351 |
| H  | -1.18910  | 1.75019  | -1.53398 |
| H  | -3.11886  | -1.93158 | -0.44535 |
| N  | -3.50772  | 0.66801  | -0.88877 |
| C  | -4.77205  | 0.20319  | -1.03871 |
| C  | -5.58381  | 1.28988  | -0.77556 |
| H  | -4.97445  | -0.81317 | -1.34525 |
| N  | -3.52667  | 1.98919  | -0.53544 |
| N  | -4.77334  | 2.35160  | -0.47408 |
| C  | -7.03606  | 1.40750  | -0.79016 |
| C  | -7.64074  | 2.63964  | -0.50484 |
| C  | -7.85396  | 0.30860  | -1.08643 |
| C  | -9.02412  | 2.76472  | -0.51658 |
| H  | -7.00386  | 3.49098  | -0.27507 |
| C  | -9.23735  | 0.43738  | -1.09822 |
| H  | -7.40196  | -0.65779 | -1.30938 |
| C  | -9.82910  | 1.66633  | -0.81323 |
| H  | -9.47854  | 3.72841  | -0.29273 |
| H  | -9.85725  | -0.42677 | -1.33102 |
| H  | -10.91288 | 1.76680  | -0.82231 |
| H  | 3.13004   | -4.00163 | 0.47504  |
| H  | 4.76093   | -2.49931 | 0.19627  |
| C  | 6.72484   | 4.52412  | -0.97483 |
| C  | 5.93981   | 3.38504  | -0.87017 |
| C  | 4.95387   | 3.28218  | 0.12873  |
| C  | 4.78049   | 4.35413  | 1.01615  |
| C  | 5.57105   | 5.49186  | 0.90370  |
| C  | 6.54423   | 5.58465  | -0.08790 |
| H  | 7.48050   | 4.58615  | -1.75594 |
| H  | 6.07276   | 2.55651  | -1.56356 |
| H  | 4.02333   | 4.28809  | 1.79100  |
| H  | 5.42415   | 6.31477  | 1.60097  |
| H  | 7.15928   | 6.47881  | -0.17094 |
| C  | 4.18428   | 2.06475  | 0.19191  |
| C  | 3.97458   | 0.88485  | -0.23115 |
| Cu | 2.88868   | -0.66571 | -0.20892 |
| N  | 1.87567   | 0.22530  | 1.44265  |
| N  | 2.02122   | 1.48484  | 1.69448  |
| N  | 2.78018   | 2.35275  | 1.38430  |
| C  | 0.68534   | -0.36099 | 1.93046  |
| C  | 0.70596   | -1.72583 | 2.22081  |

|   |          |          |         |
|---|----------|----------|---------|
| C | -0.51930 | 0.34716  | 2.05682 |
| C | -0.44985 | -2.38998 | 2.61335 |
| H | 1.64429  | -2.27154 | 2.12224 |
| C | -1.67089 | -0.30320 | 2.45597 |
| H | -0.54717 | 1.40704  | 1.81066 |
| C | -1.65022 | -1.67995 | 2.71719 |
| H | -0.40940 | -3.45623 | 2.81718 |
| H | -2.61640 | 0.22994  | 2.53222 |
| O | -2.84736 | -2.23782 | 3.03715 |
| C | -2.87802 | -3.63969 | 3.19721 |
| H | -2.25345 | -3.96620 | 4.04104 |
| H | -3.91917 | -3.89786 | 3.39868 |
| H | -2.54094 | -4.15390 | 2.28455 |

### 13.0 Analytical data of compounds

**1-(4-Methoxyphenyl)-4-phenyl-1H-1,2,3-triazole (3a):** Following the GP-1, 1-azido-4-methoxybenzene

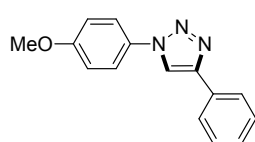

**1a** (50 mg, 0.33 mmol, 1 equiv), phenylacetylene **2a** (57  $\mu$ L, 0.50 mmol, 1.5 equiv)

afforded **3a** as a white solid (79 mg, 95%). <sup>1</sup>H NMR (500 MHz, DMSO-*d*<sub>6</sub>): 9.18 (s,

1H), 7.94 (d, 2H, *J* = 7.6 Hz), 7.86 (d, 2H, *J* = 8.9 Hz), 7.50 (t, 2H, *J* = 7.6 Hz),

7.38 (t, 1H, *J* = 6.3 Hz), 7.17 (d, 2H, *J* = 8.9 Hz), 3.85 (s, 3H); <sup>13</sup>C NMR (100 MHz, DMSO-*d*<sub>6</sub>): 159.0,

130.0, 129.7, 128.6, 127.8, 124.9, 121.4, 119.3, 114.6, 55.2; HRMS (ESI) calcd for C<sub>15</sub>H<sub>14</sub>N<sub>3</sub>O[M+H]<sup>+</sup>:

252.1137; found: 252.1127.

**4-(4-Phenyl-1H-1,2,3-triazol-1-yl)phenol (3b):** Following the GP-1, 4-azidophenol **1b** (50 mg,

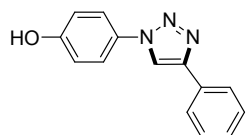

0.37 mmol, 1 equiv) and phenylacetylene **2a** (63  $\mu$ L, 0.56 mmol, 1.5 equiv) afforded

**3b** as a brown solid (79 mg, 90%). <sup>1</sup>H NMR (500 MHz, CDCl<sub>3</sub>): 9.97 (s, 1H), 9.11

(s, 1H), 7.92 (d, 2H, *J* = 9.8 Hz), 7.72 (d, 2H, *J* = 11.0 Hz), 7.48 (t, 2H, *J* = 9.2 Hz),

7.36 (t, 1H, *J* = 9.2 Hz), 6.96 (d, 2H, *J* = 10.4 Hz); <sup>13</sup>C NMR (100 MHz, CDCl<sub>3</sub>): 157.8, 147.0, 130.4,

128.9, 128.8, 128.1, 125.3, 121.9, 119.5, 116.1; HRMS (ESI) calcd for C<sub>14</sub>H<sub>12</sub>N<sub>3</sub>O [M+H]<sup>+</sup>: 238.0980;

found: 238.0974.

**4-(4-Phenyl-1H-1,2,3-triazol-1-yl)aniline (3c):** Following the GP-1, 4-azidoaniline **1c** (50 mg, 0.37

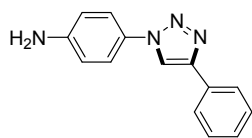

mmol, 1 equiv), phenylacetylene **2a** (63  $\mu$ L, 0.56 mmol, 1.5 equiv) afforded **3c** as a

white solid (80 mg, 91%). <sup>1</sup>H NMR (500 MHz, CDCl<sub>3</sub>): 7.99 (s, 1H), 7.82 (d, 2H, *J*

= 6.9 Hz), 7.44 (d, 2H, *J* = 8.8 Hz), 7.38 (t, 2H, *J* = 7.6 Hz), 7.28 (t, 1H, *J* = 7.6 Hz),

6.69 (d, 2H, *J* = 8.2 Hz); <sup>13</sup>C NMR (100 MHz, CDCl<sub>3</sub>): 148.1, 147.3, 130.6, 129.0, 128.7, 128.3, 125.9,

122.4, 117.9, 115.4; HRMS (ESI) calcd for C<sub>14</sub>H<sub>13</sub>N<sub>4</sub> [M+H]<sup>+</sup>: 237.1140; found: 237.1144.



**1-(4-Fluorophenyl)-4-phenyl-1H-1,2,3-triazole (3d):** Following the GP-1, 1-azido-4-fluorobenzene **1d** (50 mg, 0.36 mmol, 1 equiv), phenylacetylene **2a** (62  $\mu$ L, 0.55 mmol, 1.5 equiv) afforded **3d** as a yellowish white solid (80 mg, 93%).  $^1\text{H}$  NMR (500 MHz, DMSO- $d_6$ ): 9.28 (s, 1H), 8.02-7.99 (m, 2H), 7.94 (d, 2H,  $J = 7.6$  Hz), 7.52-7.49 (m, 4H), 7.40 (t, 1H,  $J = 6.9$  Hz);  $^{13}\text{C}$  NMR (125 MHz, DMSO- $d_6$ ): 147.1, 147.0, 132.9, 128.7, 127.9, 125.0, 122.2, 122.0, 121.0, 119.6, 116.5, 116.3; HRMS (ESI) calcd for  $\text{C}_{14}\text{H}_{11}\text{FN}_3$   $[\text{M}+\text{H}]^+$ : 240.0937; found: 240.0926.

**1-(4-Bromophenyl)-4-phenyl-1H-1,2,3-triazole (3e):** Following the GP-1, 1-azido-4-bromobenzene **1e** (50 mg, 0.25 mmol, 1 equiv), phenylacetylene **2a** (43  $\mu$ L, 0.38 mmol, 1.5 equiv) afforded **3e** as a brown solid (69 mg, 90%).  $^1\text{H}$  NMR (400 MHz, DMSO- $d_6$ ): 9.33 (s, 1H), 7.93 (d, 4H,  $J = 8.6$  Hz), 7.86-7.84 (m, 2H), 7.51 (t, 2H,  $J = 7.3$  Hz), 7.39 (t, 1H,  $J = 7.3$  Hz);  $^{13}\text{C}$  NMR (100 MHz, DMSO- $d_6$ ): 147.5, 135.8, 132.8, 130.1, 128.9, 128.3, 125.3, 121.9, 121.3, 119.6; HRMS (ESI) calcd for  $\text{C}_{14}\text{H}_{11}\text{BrN}_3$   $[\text{M}+\text{H}]^+$ : 300.0136; found: 300.0132.

**1-(4-Nitrophenyl)-4-phenyl-1H-1,2,3-triazole (3f):** Following the GP-1, 1-azido-4-nitrobenzene **1f** (50 mg, 0.30 mmol, 1 equiv), phenylacetylene **2a** (51  $\mu$ L, 0.45 mmol, 1.5 equiv) afforded **3f** as a yellow solid (68 mg, 85%).  $^1\text{H}$  NMR (400 MHz, DMSO- $d_6$ ): 9.53 (s, 1H), 8.51 (d, 2H,  $J = 9.2$  Hz), 8.27 (d, 2H,  $J = 9.2$  Hz), 7.96 (d, 2H,  $J = 7.3$  Hz), 7.53 (t, 2H,  $J = 7.3$  Hz), 7.42 (t, 1H,  $J = 7.3$  Hz);  $^{13}\text{C}$  NMR (100 MHz, DMSO- $d_6$ ): 147.5, 146.4, 140.5, 129.4, 128.7, 128.2, 125.3, 125.1, 120.1, 119.6; HRMS (ESI) calcd for  $\text{C}_{14}\text{H}_{11}\text{N}_4\text{O}_2$   $[\text{M}+\text{H}]^+$ : 267.0882; found: 267.0899.

**1-(4-(4-Phenyl-1H-1,2,3-triazol-1-yl)phenyl)ethanone (3g):** Following the GP-1, 1-(4-azidophenyl)ethanone **1g** (50 mg, 0.31 mmol, 1 equiv), phenylacetylene **2a** (51  $\mu$ L, 0.46 mmol, 1.5 equiv) afforded **3g** as a white solid (73 mg, 92%).  $^1\text{H}$  NMR (400 MHz,  $\text{CDCl}_3$ ): 8.27 (s, 1H), 8.15 (d, 2H,  $J = 8.6$  Hz), 7.93 (t, 4H,  $J = 8.6$  Hz), 7.48 (t, 2H,  $J = 7.0$  Hz), 7.40 (d, 1H,  $J = 7.5$  Hz), 2.67 (s, 3H);  $^{13}\text{C}$  NMR (100 MHz,  $\text{CDCl}_3$ ): 196.7, 149.1, 137.1, 130.3, 130.0, 129.2, 128.9, 126.1, 121.4, 120.2, 117.4, 26.8; HRMS (ESI) calcd for  $\text{C}_{16}\text{H}_{14}\text{N}_3\text{O}$   $[\text{M}+\text{H}]^+$ : 264.1137; found: 264.1149.

**1-(2,6-Dimethylphenyl)-4-phenyl-1H-1,2,3-triazole (3h):** Following the GP-1, 2-azido-1,3,5-trimethylbenzene **1h** (50 mg, 0.34 mmol, 1 equiv), phenylacetylene **2a** (58  $\mu$ L, 0.51 mmol, 1.5 equiv) afforded **3h** as a white solid (81 mg, 95%).  $^1\text{H}$  NMR (400 MHz,  $\text{CDCl}_3$ ): 8.00 (d, 2H,  $J = 7.8$  Hz), 7.87 (s, 1H), 7.54 (dd, 2H,  $J = 8.3, 8.8$  Hz), 7.44-7.36 (m, 1H), 7.24 (d, 1H,  $J = 7.3$  Hz), 6.99 (d, 2H,  $J = 7.3$  Hz), 6.70 (t, 1H,  $J = 7.4$  Hz), 2.22 (s, 6H), 2.10 (s, 3H);  $^{13}\text{C}$  NMR (100 MHz,  $\text{CDCl}_3$ ): 147.6, 142.7, 135.9, 135.3, 132.0, 130.4,

129.9, 128.8, 128.4, 128.1, 125.7, 121.5, 121.4, 117.8, 17.4, 17.3; HRMS (ESI) calcd for  $C_{17}H_{18}N_3$   $[M+H]^+$ : 264.1501; found: 264.1521.

**1-(2,6-Dimethoxyphenyl)-4-phenyl-1H-1,2,3-triazole (3i):** Following the GP-1, 2-azido-1,3-dimethoxybenzene **1i** (50 mg, 0.28 mmol, 1 equiv), phenylacetylene **2a** (48  $\mu$ L, 0.42 mmol, 1.5 equiv) afforded **3i** as a white solid (73 mg, 93%).  $^1H$  NMR (400 MHz,  $CDCl_3$ ): 8.16 (s, 1H), 7.89 (d, 2H,  $J = 7.8$  Hz), 7.44 (t, 2H,  $J = 7.3$  Hz), 7.35 (t, 1H,  $J = 7.8$  Hz), 6.94 (d, 2H,  $J = 2.0$  Hz), 6.51 (s, 1H), 3.85 (s, 6H);  $^{13}C$  NMR (100 MHz,  $CDCl_3$ ): 164.7, 148.4, 138.7, 130.3, 129.0, 128.5, 125.9, 117.9, 100.7, 99.1, 55.8; HRMS (ESI) calcd for  $C_{16}H_{16}N_3O_2$   $[M+H]^+$ : 282.1243; found: 282.1235.

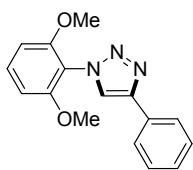

**3-(4-Phenyl-1H-1,2,3-triazol-1-yl)aniline (3j):** Following the GP-1, 3-azidoaniline **1j** (50 mg, 0.37 mmol, 1 equiv), phenylacetylene **2a** (63  $\mu$ L, 0.56 mmol, 1.5 equiv) afford **3j** as a white solid (145 mg, 92%).  $^1H$  NMR (400 MHz,  $CDCl_3$ ): 8.15 (s, 1H), 7.90 (d, 2H,  $J = 6.8$  Hz), 7.46 (t, 2H,  $J = 7.8$  Hz), 7.36 (t, 1H,  $J = 7.3$  Hz), 7.29 (d, 1H,  $J = 8.3$  Hz), 7.18 (t, 1H,  $J = 2.0$  Hz), 7.06 (d, 1H,  $J = 7.8$  Hz);  $^{13}C$  NMR (125 MHz,  $CDCl_3$ ): 148.3, 148.0, 138.2, 130.6, 130.5, 129.2, 129.1, 128.5, 126.0, 117.8, 115.3, 110.1, 107.1; HRMS (ESI) calcd for  $C_{14}H_{13}N_4$   $[M+H]^+$ : 237.1140; found: 237.1145.

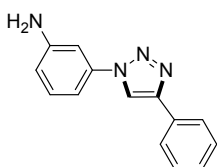

**2-Methyl-4-(4-phenyl-1H-1,2,3-triazol-1-yl)phenol (3k):** Following the GP-1, 4-azido-2-methylphenol **1k** (50 mg, 0.33 mmol, 1 equiv), phenylacetylene **2a** (56  $\mu$ L, 0.50 mmol, 1.5 equiv) afforded **3k** as a white solid (78 mg, 94%).  $^1H$  NMR (125 MHz,  $CDCl_3$ ): 9.95 (s, 1H), 9.16 (s, 1H), 7.92 (d, 2H,  $J = 8.6$  Hz), 7.48 (t, 2H,  $J = 7.9$  Hz), 7.38-7.34 (m, 2H), 7.27 (d, 1H,  $J = 7.9$  Hz), 7.21 (dd, 1H,  $J = 1.8, 6.1$  Hz), 2.19 (s, 3H);  $^{13}C$  NMR (100 MHz,  $CDCl_3$ ): 156.2, 147.1, 135.3, 131.4, 130.3, 128.9, 128.1, 125.3, 124.9, 119.3, 110.1, 106.3, 15.6; HRMS (ESI) calcd for  $C_{15}H_{14}N_3O$   $[M+H]^+$ : 252.1137; found: 252.1130.

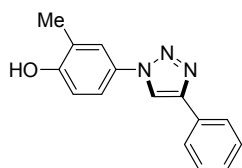

**1-(Naphthalen-1-yl)-4-phenyl-1H-1,2,3-triazole (3l):** Following the GP-1, 1-azidonaphthalene **1l** (50 mg, 0.30 mmol, 1 equiv), phenylacetylene **2a** (50  $\mu$ L, 0.45 mmol, 1.5 equiv) afforded **3l** as a brownish solid (77 mg, 94%).  $^1H$  NMR (400 MHz,  $CDCl_3$ ): 8.14 (s, 1H), 8.02 (d, 1H,  $J = 7.5$  Hz), 7.96 (d, 3H,  $J = 7.5$  Hz), 7.69 (d, 1H,  $J = 8.0$  Hz), 7.63-7.52 (m, 3H), 7.48 (t, 2H,  $J = 7.5$  Hz), 7.40-7.31 (m, 2H);  $^{13}C$  NMR (100 MHz,  $CDCl_3$ ): 147.8, 134.2, 133.8, 132.2, 130.5, 130.4, 129.1, 128.5, 128.4, 127.9, 127.2, 125.9, 125.1, 123.6, 122.4; HRMS (ESI) calcd for  $C_{18}H_{14}N_3$   $[M+H]^+$ : 272.1188; found: 272.1180.

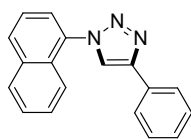

**2-(4-phenyl-1H-1,2,3-triazol-1-yl)benzotrile (3m):** Following the GP-1, 2-azidobenzotrile **1m** (50 mg, 0.35 mmol, 1 equiv), phenylacetylene **2a** (59  $\mu$ L, 0.52 mmol, 1.5 equiv) afforded

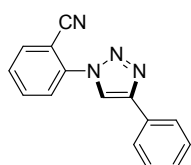

**3m** as a white solid (81 mg, 94%). <sup>1</sup>H NMR (400 MHz, DMSO-d<sub>6</sub>): 9.47 (s, 1H), 8.18 (dd, 4H, *J* = 8.6, 12.2 Hz), 7.95 (d, 2H, *J* = 7.8 Hz), 7.52 (t, 2H, *J* = 7.3 Hz), 7.41 (t, 1H, *J* = 7.3 Hz); <sup>13</sup>C NMR (100 MHz, DMSO-d<sub>6</sub>): 147.6, 139.4, 134.2, 129.7, 128.9, 128.4, 125.3, 120.3, 119.7, 110.9; HRMS (ESI) calcd for C<sub>15</sub>H<sub>11</sub>N<sub>4</sub>[M+H]<sup>+</sup>: 247.0984; found: 247.0977.

**4-(2-methoxyphenyl)-1-(4-methoxyphenyl)-1H-1,2,3-triazole (3n)**: Following the GP-1, 1-azido-4-

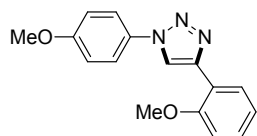

methoxybenzene **1a** (50 mg, 0.33 mmol, 1 equiv), 1-ethynyl-2-methoxybenzene **2b** (66 mg, 0.50 mmol, 1.5 equiv) afforded **3n** as a brownish solid (87 mg, 94%).

<sup>1</sup>H NMR (400 MHz, CDCl<sub>3</sub>): 8.42-8.38 (m, 2H), 7.70 (dd, 2H, *J* = 1.9, 4.5 Hz), 7.37-7.32 (m, 1H), 7.12 (t, 1H, *J* = 7.8 Hz), 7.06-7.05 (m, 3H), 3.98 (s, 3H), 3.90 (s, 3H); <sup>13</sup>C NMR (100 MHz, CDCl<sub>3</sub>): 155.8, 145.8, 137.0, 132.2, 129.2, 128.1, 122.5, 121.4, 121.3, 119.6, 115.0, 111.0, 55.8, 55.6; HRMS (ESI) calcd for C<sub>16</sub>H<sub>16</sub>N<sub>3</sub>O<sub>2</sub> [M+H]<sup>+</sup>: 282.1243; found: 282.1234.

**1-(4-Methoxyphenyl)-4-(2,4,5-trimethylphenyl)-1H-1,2,3-triazole (3o)**: Following the GP-1, 1-azido-4-

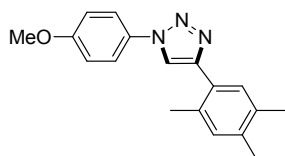

methoxybenzene **1a** (50 mg, 0.33 mmol, 1 equiv), 1-ethynyl-2,4,5-trimethylbenzene **2c** (72 mg, 0.50 mmol, 1.5 equiv) afforded **3o** as a white solid

(92 mg, 95%). <sup>1</sup>H NMR (500 MHz, CDCl<sub>3</sub>): 7.67 (d, 1H, *J* = 7.6 Hz), 7.45 (d, 1H, *J* = 8.2 Hz), 7.40 (dd, 2H, *J* = 5.7 Hz, 4.0 Hz), 7.27 (d, 1H, *J* = 6.3 Hz), 7.18 (t, 1H, *J* = 6.9 Hz), 7.15 (t, 1H, *J* = 7.0 Hz), 7.03 (dd, 2H, *J* = 8.2 Hz, 7.0 Hz), 6.64 (d, 2H, *J* = 7.6 Hz), 3.87 (s, 3H); <sup>13</sup>C NMR (100 MHz, CDCl<sub>3</sub>): 158.4, 136.5, 133.0, 129.1, 128.4, 126.2, 122.3, 121.2, 120.2, 114.9, 110.5, 103.0, 55.7; HRMS (ESI) calcd for C<sub>18</sub>H<sub>20</sub>N<sub>3</sub>O [M+H]<sup>+</sup>: 294.1606; found: 294.1625.

**4-(3-Fluorophenyl)-1-(4-methoxyphenyl)-1H-1,2,3-triazole (3p)**: Following the GP-1, 1-azido-4-

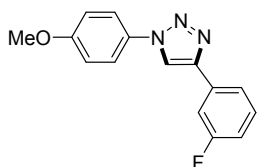

methoxybenzene **1a** (50 mg, 0.33 mmol, 1 equiv), 1-ethynyl-3-fluorobenzene **2d**

(61 mg, 0.50 mmol, 1.5 equiv) afforded **3p** as a white solid (81 mg, 91%). <sup>1</sup>H NMR (500 MHz, CDCl<sub>3</sub>): 8.11 (s, 1H), 7.69-7.66 (m, 3H), 7.64-7.62 (m, 1H), 7.44-7.40 (m, 1H), 7.08-7.04 (m, 3H), 3.89 (s, 3H); <sup>13</sup>C NMR (100 MHz, CDCl<sub>3</sub>): 164.8, 162.3, 160.2, 147.3, 130.7, 130.6, 122.4, 121.6, 121.5, 118.4, 115.4, 115.2, 115.0, 113.1, 112.8, 55.8; HRMS (ESI) calcd for C<sub>15</sub>H<sub>13</sub>FN<sub>3</sub>O [M+H]<sup>+</sup>: 270.1043; found: 270.1055.

**4-(3,5-Dimethoxyphenyl)-1-(4-methoxyphenyl)-1H-1,2,3-triazole (3q)**: Following the GP-1, 1-azido-4-

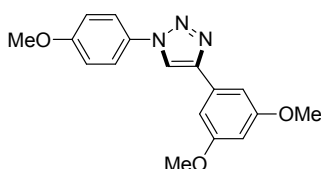

methoxybenzene **1a** (50 mg, 0.33 mmol, 1 equiv), 1-ethynyl-3,5-dimethoxybenzene **2e** (81 mg, 0.50 mmol, 1.5 equiv) afforded **3q** as a white

solid (92 mg, 90%). <sup>1</sup>H NMR (500 MHz, CDCl<sub>3</sub>): 8.09 (s, 1H), 7.65 (d, 2H, *J* = 8.2 Hz), 7.06 (s, 2H), 7.01 (d, 2H, *J* = 7.6 Hz), 6.46 (s, 1H), 3.86 (s, 3H), 3.83 (s, 6H); <sup>13</sup>C NMR (100 MHz, CDCl<sub>3</sub>): 161.3, 160.0, 132.3, 130.6, 122.3, 118.3, 114.9, 110.0, 103.9, 100.8, 55.7, 55.6; HRMS (ESI) calcd for C<sub>17</sub>H<sub>18</sub>N<sub>3</sub>O<sub>3</sub> [M+H]<sup>+</sup>: 312.1348; found: 312.1340.

**4-(3,5-Difluorophenyl)-1-(4-methoxyphenyl)-1H-1,2,3-triazole (3r):** Following the GP-1, 1-azido-4-methoxybenzene **1a** (50 mg, 0.33 mmol, 1 equiv), 1-ethynyl-3,5-difluorobenzene **2f** (69 mg, 0.50 mmol, 1.5 equiv) afforded **3r** as a white solid (87 mg, 92%). <sup>1</sup>H NMR (400 MHz, CDCl<sub>3</sub>): 8.12 (s, 1H), 7.67 (d, 2H, *J* = 8.8 Hz), 7.43 (d, 2H, *J* = 6.4 Hz), 7.05 (d, 3H, *J* = 8.8 Hz), 6.83-6.78 (m, 1H), 3.89 (s, 3H); <sup>13</sup>C NMR (100 MHz, CDCl<sub>3</sub>): 164.9, 164.8, 162.4, 162.3, 160.3, 133.8, 133.6, 130.4, 122.5, 122.4, 118.7, 115.1, 108.9, 108.8, 108.7, 108.6, 103.9, 103.7, 103.4, 55.8; HRMS (ESI) calcd for C<sub>15</sub>H<sub>12</sub>F<sub>2</sub>N<sub>3</sub>O [M+H]<sup>+</sup>: 288.0948; found: 288.0943.

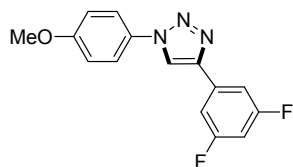

**4-(4-(Tert-butyl)phenyl)-1-(4-methoxyphenyl)-1H-1,2,3-triazole (3s):** Following the GP-1, 1-azido-4-methoxybenzene **1a** (50 mg, 0.33 mmol, 1 equiv), 1-(*tert*-butyl)-4-ethynylbenzene **2g** (79 mg, 0.50 mmol, 1.5 equiv) afforded **3s** as a white solid (91 mg, 90%). <sup>1</sup>H NMR (400 MHz, CDCl<sub>3</sub>): 8.09 (br s, 1H), 7.83 (d, 2H, *J* = 8.3 Hz), 7.69 (d, 2H, *J* = 8.8 Hz), 7.48 (d, 2H, *J* = 7.8 Hz), 7.04 (d, 2H, *J* = 8.8 Hz), 3.88 (s, 3H), 1.36 (s, 9H); <sup>13</sup>C NMR (100 MHz, CDCl<sub>3</sub>): 160.0, 151.6, 127.8, 125.9, 125.7, 122.4, 114.9, 55.8, 34.9, 31.4; HRMS (ESI) calcd for C<sub>19</sub>H<sub>22</sub>N<sub>3</sub>O [M+H]<sup>+</sup>: 308.1763; found: 308.1776.

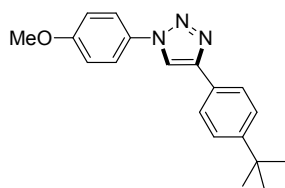

**1-(4-Methoxyphenyl)-4-(4-pentylphenyl)-1H-1,2,3-triazole (3t):** Following the GP-1, 1-azido-4-methoxybenzene **1a** (50 mg, 0.33 mmol, 1 equiv), 1-ethynyl-4-pentylbenzene **2h** (86 mg, 0.50 mmol, 1.5 equiv) afforded **3t** as a white solid (93 mg, 88%). <sup>1</sup>H NMR (400 MHz, CDCl<sub>3</sub>): 8.01 (s, 1H), 7.80 (d, 2H, *J* = 7.8 Hz), 7.67 (d, 2H, *J* = 8.8 Hz), 7.26 (d, 2H, *J* = 7.3 Hz), 7.03 (d, 2H, *J* = 8.3 Hz), 3.87 (s, 3H), 2.64 (t, 2H, *J* = 7.4 Hz), 1.67-1.62 (m, 3H), 1.37-1.31 (m, 3H), 0.92-0.88 (m, 3H); <sup>13</sup>C NMR (100 MHz, CDCl<sub>3</sub>): 160.0, 148.5, 143.4, 130.8, 129.1, 127.9, 125.9, 122.3, 117.6, 114.9, 55.8, 35.9, 31.6, 31.2, 22.7, 14.1; HRMS (ESI) calcd for C<sub>20</sub>H<sub>24</sub>N<sub>3</sub>O [M+H]<sup>+</sup>: 322.1919; found: 322.1939.

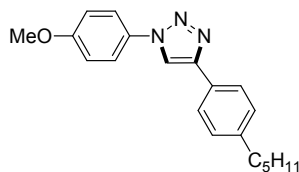

**4-(1-(4-Methoxyphenyl)-1H-1,2,3-triazol-4-yl)phenol (3u):** Following the GP-1, 1-azido-4-methoxybenzene **1a** (50 mg, 0.33 mmol, 1 equiv), 4-ethynylphenol **2i** (59 mg, 0.50 mmol, 1.5 equiv) afforded **3u** as a brownish solid (83 mg, 94%). <sup>1</sup>H NMR (400 MHz, CDCl<sub>3</sub>): 9.63 (s, 1H), 8.97 (s, 1H), 7.81 (d, 2H, *J* = 7.0 Hz), 7.71 (d, 2H, *J* = 7.0 Hz), 7.14 (dd, 2H, *J* = 2.1, 7.0 Hz), 6.84 (d, 2H, *J* = 7.0 Hz), 3.82 (d, 3H, *J* = 2.1 Hz); <sup>13</sup>C NMR (100 MHz, CDCl<sub>3</sub>): 159.2, 157.4, 127.6, 126.7, 121.5, 121.3, 120.1, 118.1, 115.6, 114.8, 55.5; HRMS (ESI) calcd for C<sub>15</sub>H<sub>14</sub>N<sub>3</sub>O<sub>2</sub> [M+H]<sup>+</sup>: 268.1086; found: 268.1080.

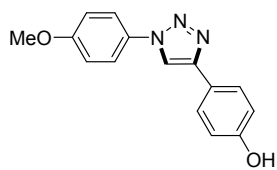

**4-(1-(4-Methoxyphenyl)-1H-1,2,3-triazol-4-yl)-N,N-dimethylaniline (3v):** Following the GP-1, 1-azido-4-methoxybenzene **1a** (50 mg, 0.33 mmol, 1 equiv), 4-ethynyl-*N,N*-dimethylaniline **2j** (73 mg, 0.50 mmol, 1.5 equiv) afforded **3v** as a brownish

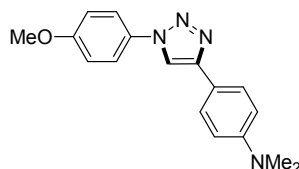

solid (91 mg, 94%). <sup>1</sup>H NMR (500 MHz, CDCl<sub>3</sub>): 7.97 (s, 1H), 7.76 (d, 2H, *J* = 9.5 Hz), 7.67 (d, 2H, *J* = 8.9 Hz), 7.02 (d, 2H, *J* = 9.5 Hz), 6.79 (d, 2H, *J* = 8.9 Hz), 3.87 (s, 3H), 3.01 (s, 6H); 1.75-1.70 (m, 4H), 1.57-1.53 (m, 2H); <sup>13</sup>C NMR (125 MHz, CDCl<sub>3</sub>): 159.8, 150.7, 148.9, 130.7, 126.9, 122.2, 118.7, 114.9, 112.7, 110.8, 55.8, 40.6; HRMS (ESI) calcd for C<sub>17</sub>H<sub>19</sub>N<sub>4</sub>O[M+H]<sup>+</sup>: 295.1559; found: 295.1543.

**4-(4-Fluorophenyl)-1-(4-methoxyphenyl)-1H-1,2,3-triazole (3w):** Following the GP-1, 1-azido-4-methoxybenzene **1a** (50 mg, 0.33 mmol, 1 equiv), 1-ethynyl-4-fluorobenzene **2k** (60 mg, 0.50 mmol, 1.5 equiv) afforded **3w** as a white solid (79 mg, 89%). <sup>1</sup>H NMR (400 MHz, CDCl<sub>3</sub>): 8.07 (s, 1H), 7.89-7.86 (m, 2H), 7.68 (d, 2H, *J* = 8.8 Hz), 7.15 (t, 2H, *J* = 8.8 Hz), 7.05 (d, 2H, *J* = 8.8 Hz), 3.89 (s, 3H); <sup>13</sup>C NMR (100 MHz, CDCl<sub>3</sub>): 160.1, 147.5, 130.7, 127.8, 127.7, 126.8, 122.4, 117.8, 116.2, 115.9, 115.0, 55.8; HRMS (ESI) calcd for C<sub>15</sub>H<sub>13</sub>FN<sub>3</sub>O[M+H]<sup>+</sup>: 270.1043; found: 270.1056.

**4-(4-Bromophenyl)-1-(4-methoxyphenyl)-1H-1,2,3-triazole (3x):** Following the GP-1, 1-azido-4-methoxybenzene **1a** (50 mg, 0.33 mmol, 1 equiv), 1-ethynyl-4-bromobenzene **2l** (91 mg, 0.50 mmol, 1.5 equiv) afforded **3x** as a white solid (99 mg, 91%). <sup>1</sup>H NMR (400 MHz, CDCl<sub>3</sub>): 8.10 (s, 1H), 7.78 (d, 2H, *J* = 8.3 Hz), 7.67 (d, 2H, *J* = 8.8 Hz), 7.58 (d, 2H, *J* = 8.3 Hz), 7.04 (d, 2H, *J* = 8.3 Hz), 3.88 (s, 3H); <sup>13</sup>C NMR (100 MHz, CDCl<sub>3</sub>): 160.1, 150.5, 146.8, 133.7, 132.3, 129.7, 127.5, 122.4, 118.1, 115.0, 55.8; HRMS (ESI) calcd for C<sub>15</sub>H<sub>13</sub>BrN<sub>3</sub>O[M+H]<sup>+</sup>: 330.0242; found: 330.0233.

**1-(4-Methoxyphenyl)-4-(4-(trifluoromethyl)phenyl)-1H-1,2,3-triazole (3y):** Following the GP-1, 1-azido-4-methoxybenzene **1a** (50 mg, 0.33 mmol, 1 equiv), 1-ethynyl-4-(trifluoromethyl)benzene **2m** (85 mg, 0.50 mmol, 1.5 equiv) afforded **3y** as a white solid (97 mg, 92%). <sup>1</sup>H NMR (500 MHz, CDCl<sub>3</sub>): 8.18 (s, 1H), 8.02 (d, 2H, *J* = 8.2 Hz), 7.73-7.68 (m, 4H), 7.06 (d, 2H, *J* = 8.8 Hz), 3.90 (s, 3H); <sup>13</sup>C NMR (100 MHz, CDCl<sub>3</sub>): 158.8, 153.9, 134.0, 133.5, 130.9, 126.2, 126.1, 122.4, 118.7, 115.1, 55.8; HRMS (ESI) calcd for C<sub>16</sub>H<sub>13</sub>F<sub>3</sub>N<sub>3</sub>O[M+H]<sup>+</sup>: 320.1011; found: 320.1030.

**4-(4-(1-(4-Methoxyphenyl)-1H-1,2,3-triazol-4-yl)phenyl)butanenitrile (3z):** Following the GP-1, 1-azido-4-methoxybenzene **1a** (50 mg, 0.33 mmol, 1 equiv), 4-(4-ethynylphenyl)butanenitrile **2n** (85 mg, 0.50 mmol, 1.5 equiv) afforded **3z** as a white solid (94 mg, 90%). <sup>1</sup>H NMR (400 MHz, CDCl<sub>3</sub>): 7.74 (s, 1H), 7.62 (d, 2H, *J* = 9.3 Hz), 7.03 (d, 2H, *J* = 8.8 Hz), 3.88 (s, 3H), 2.97 (t, 2H, *J* = 7.4 Hz), 2.49 (t, 2H, *J* = 7.3 Hz), 2.20-2.13 (m, 2H); <sup>13</sup>C NMR (100 MHz, CDCl<sub>3</sub>): 160.0, 146.3, 130.7, 122.3, 119.9, 119.5, 115.0, 55.8, 25.0, 24.4, 16.7; HRMS (ESI) calcd for C<sub>19</sub>H<sub>19</sub>N<sub>4</sub>O[M+H]<sup>+</sup>: 319.1559; found: 319.1550.

**1-Benzyl-4-phenyl-1H-1,2,3-triazole (6a):** Following the GP-2, benzyl azide **4a** (50 mg, 0.38 mmol, 1 equiv), phenylacetylene **2a** (65  $\mu$ L, 0.57 mmol, 1.5 equiv) afforded **6a** as a white solid (84mg, 94%). <sup>1</sup>H NMR (400 MHz, DMSO-d<sub>6</sub>): 8.63 (s, 1H), 7.84 (d, 2H, *J* = 6.7 Hz), 7.45-7.31 (m, 8H), 5.63 (s, 2H); <sup>13</sup>C NMR (100 MHz, DMSO-d<sub>6</sub>): 146.3, 135.6, 130.3, 128.5, 128.4, 127.8, 127.5, 124.8, 121.2, 52.7; HRMS (ESI) calcd for C<sub>15</sub>H<sub>14</sub>N<sub>3</sub>[M+H]<sup>+</sup>: 236.1188; found: 236.1171.

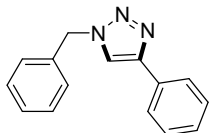

**1-Benzyl-4-(3-fluorophenyl)-1H-1,2,3-triazole (6b):** Following the GP-2, benzyl azide **4a** (50 mg, 0.38 mmol, 1 equiv), 1-ethynyl-4-bromobenzene **2g** (103 mg, 0.57 mmol, 1.5 equiv) afforded **6b** as a white solid (100 mg, 94%). <sup>1</sup>H NMR (400 MHz, CDCl<sub>3</sub>): 7.72 (d, 2H, *J* = 8.2 Hz), 7.62 (s, 1H), 7.42 (d, 2H, *J* = 8.8 Hz), 7.39-7.37 (m, 3H), 7.29 (dd, 2H, *J* = 1.3, 6.3 Hz), 5.58 (s, 2H), 1.33 (s, 9H); <sup>13</sup>C NMR (100 MHz, CDCl<sub>3</sub>): 151.5, 148.4, 134.9, 132.0, 129.3, 128.9, 128.2, 127.9, 125.9, 125.6, 119.4, 54.3, 34.8, 31.4; HRMS (ESI) calcd for C<sub>19</sub>H<sub>22</sub>N<sub>3</sub> [M+H]<sup>+</sup>: 292.1814; found: 292.1804.

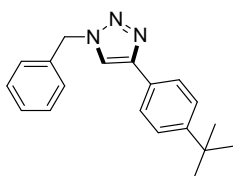

**1-Benzyl-4-(3-fluorophenyl)-1H-1,2,3-triazole (6c):** Following the GP-2, benzyl azide **4a** (50 mg, 0.38 mmol, 1 equiv), 1-ethynyl-4-bromobenzene **2l** (103 mg, 0.57 mmol, 1.5 equiv) afforded **6c** as a white solid (113 mg, 96%). <sup>1</sup>H NMR (400 MHz, CDCl<sub>3</sub>): 7.68 (s, 1H), 7.65 (d, 2H, *J* = 8.3 Hz), 7.52 (d, 2H, *J* = 8.3 Hz), 7.39 (d, 2H, *J* = 6.8 Hz), 7.31 (dd, 2H, *J* = 2.0, 2.4 Hz), 5.58 (s, 2H); <sup>13</sup>C NMR (100 MHz, CDCl<sub>3</sub>): 134.7, 132.1, 129.7, 129.4, 129.1, 128.3, 127.4, 122.3, 119.7, 54.5; HRMS (ESI) calcd for C<sub>15</sub>H<sub>13</sub>BrN<sub>3</sub> [M+H]<sup>+</sup>: 314.0293; found: 314.0297.

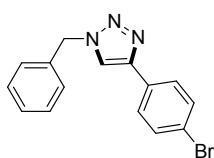

**1-Benzyl-4-(thiophen-3-yl)-1H-1,2,3-triazole (6d):** Following the GP-2, benzyl azide **4a** (50 mg, 0.38 mmol, 1 equiv), 3-ethynylthiophene **5a** (103 mg, 0.57 mmol, 1.5 equiv) afforded **6d** as a white solid (110 mg, 91%). <sup>1</sup>H NMR (500 MHz, CDCl<sub>3</sub>): 7.65 (dd, 1H, *J* = 1.3, 1.9 Hz), 7.56 (s, 1H), 7.41 (dd, 1H, *J* = 1.3, 3.8 Hz), 7.39-7.37 (m, 2H), 7.35 (dd, 2H, *J* = 1.9, 3.1 Hz), 7.30 (dd, 2H, *J* = 1.9, 5.7 Hz), 5.57 (s, 2H); <sup>13</sup>C NMR (100 MHz, CDCl<sub>3</sub>): 144.6, 134.8, 131.9, 129.3, 128.9, 128.2, 126.4, 125.9, 121.3, 119.4, 54.4; HRMS (ESI) calcd for C<sub>13</sub>H<sub>13</sub>N<sub>3</sub>S [M+H]<sup>+</sup>: 242.0752; found: 242.0748.

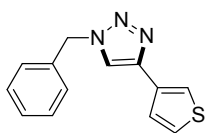

**2-(1-Benzyl-1H-1,2,3-triazol-4-yl)pyridine (6e):** Following the GP-2, benzyl azide **4a** (50 mg, 0.38 mmol, 1 equiv), 2-ethynylpyridine **5b** (59 mg, 0.57 mmol, 1.5 equiv) afforded **6e** as a white solid (75 mg, 83%). <sup>1</sup>H NMR (400 MHz, DMSO-d<sub>6</sub>): 8.63 (s, 1H), 7.84 (d, 2H, *J* = 6.7 Hz), 7.45-7.31 (m, 8H), 5.64 (s, 2H); <sup>13</sup>C NMR (100 MHz, DMSO-d<sub>6</sub>): 146.3, 135.6, 130.3, 128.5, 128.4, 127.8, 127.5, 124.8, 121.2, 52.7; HRMS (ESI) calcd for C<sub>14</sub>H<sub>13</sub>N<sub>4</sub>[M+H]<sup>+</sup>: 237.1140; found: 237.1156.

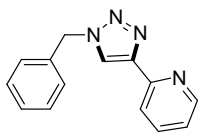

**1-Benzyl-4-(trimethylsilyl)-1H-1,2,3-triazole (6f):** Following the GP-2, benzyl azide **4a** (50 mg, 0.38 mmol, 1 equiv), trimethylsilylacetylene **5c** (72 mg, 0.57 mmol, 1.5 equiv) afforded **6f** as grey coloured liquid (69 mg, 78%). <sup>1</sup>H NMR (500 MHz, CDCl<sub>3</sub>): 7.45 (s, 1H), 7.39-7.35 (m, 3H), 7.29-7.27 (m, 2H), 5.56 (s, 2H), 0.31 (s, 9H); <sup>13</sup>C NMR (100 MHz, CDCl<sub>3</sub>): 135.0, 129.1, 128.7, 128.2, 53.6, -1.02; HRMS (ESI) calcd for C<sub>12</sub>H<sub>18</sub>N<sub>3</sub>Si[M+H]<sup>+</sup>: 232.1270; found: 232.1277.

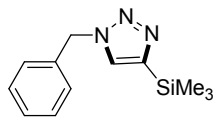

**N<sup>1</sup>,N<sup>4</sup>-bis(2-(4-phenyl-1H-1,2,3-triazol-1-yl)ethyl)terephthalamide (6g):** Following the GP-2, N<sup>1</sup>,N<sup>4</sup>-bis(2-azidoethyl)terephthalamide **4b** (50 mg, 0.17 mmol, 1 equiv), phenylacetylene **2a** (28 μL, 0.25 mmol, 1.5 equiv) afforded **6g** as a sticky solid (65 mg, 75%). <sup>1</sup>H NMR (500 MHz, DMSO-d<sub>6</sub>): 8.77 (t, 2H, *J* = 5.7 Hz), 8.57 (s, 2H), 7.82-7.81 (m, 8H), 7.43 (t, 4H, *J* = 6.1 Hz), 7.31 (t, 2H, *J* = 6.0 Hz), 4.60 (t, 4H, *J* = 4.6 Hz), 3.37-3.33 (m, 4H); <sup>13</sup>C NMR (100 MHz, DMSO-d<sub>6</sub>): 165.6, 136.1, 130.4, 128.5, 127.4, 126.8, 124.7, 121.3, 48.5, 40.1 (merged with DMSO in <sup>13</sup>C, found in DEPT); HRMS (ESI) calcd for C<sub>28</sub>H<sub>27</sub>N<sub>8</sub>O<sub>2</sub>[M+H]<sup>+</sup>: 507.2257; found: 507.2241.

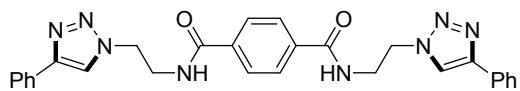

**N,N-dimethyl-3-(4-phenyl-1H-1,2,3-triazol-1-yl)propan-1-amine (6h):** Following the GP-2, 3-azido-N,N-dimethylpropan-1-amine **4c** (50 mg, 0.39 mmol, 1 equiv), 3-ethynyl-9H-carbazole **5d** (112 mg, 0.58 mmol, 1.5 equiv) afforded **6h** as a white solid (100 mg, 79%). <sup>1</sup>H NMR (500 MHz, DMSO-d<sub>6</sub>): 11.35 (s, 1H), 8.85 (s, 1H), 8.15 (d, 1H, *J* = 8.4 Hz), 7.88 (d, 1H, *J* = 8.4 Hz), 7.54 (d, 1H, *J* = 8.4 Hz), 7.50 (d, 1H, *J* = 8.4 Hz), 7.40 (t, 1H, *J* = 6.7 Hz), 7.18 (t, 1H, *J* = 6.7 Hz), 4.44 (t, 2H, *J* = 7.6 Hz), 2.35 (t, 2H, *J* = 7.6 Hz), 2.23 (s, 6H), 2.06 (t, 2H, *J* = 7.6 Hz). <sup>13</sup>C NMR (100 MHz, DMSO-d<sub>6</sub>): 147.5, 140.2, 139.4, 125.7, 123.3, 122.7, 122.3, 121.6, 120.3, 120.2, 118.7, 116.8, 111.2, 111.1, 54.8, 45.5, 44.7, 27.3; HRMS (ESI) calcd for C<sub>19</sub>H<sub>22</sub>N<sub>5</sub>[M+H]<sup>+</sup>: 320.1875; found: 320.1883.

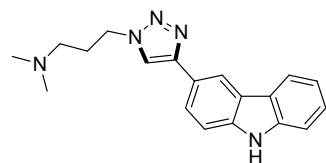

**4-(4-Phenyl-1H-1,2,3-triazol-1-yl)thiazole (6i):** Following the GP-2, 4-azidothiazole **4d** (50 mg, 0.40 mmol, 1 equiv), phenylacetylene **2a** (67 μL, 0.59 mmol, 1.5 equiv) afforded **6i** as a white solid (78 mg, 85%). <sup>1</sup>H NMR (500 MHz, DMSO-d<sub>6</sub>): 9.42 (s, 1H), 8.03 (d, 2H, *J* = 7.0 Hz), 7.87 (d, 1H, *J* = 3.8 Hz), 7.80 (d, 1H, *J* = 3.8 Hz), 7.50 (t, 2H, *J* = 7.6 Hz), 7.41 (d, 1H, *J* = 7.6 Hz); <sup>13</sup>C NMR (100 MHz, DMSO-d<sub>6</sub>): 156.3, 147.3, 140.3, 129.0, 128.7, 128.4, 125.4, 119.6, 118.5; HRMS (ESI) calcd for C<sub>11</sub>H<sub>9</sub>N<sub>4</sub>S [M+H]<sup>+</sup>: 229.0548; found: 229.0531.

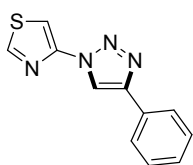

**3-(4-Phenyl-1H-1,2,3-triazol-1-yl)-2H-chromen-2-one (6j):** Following the GP-2, 3-azido-2H-chromen-2-one **4e** (50 mg, 0.27 mmol, 1 equiv), phenylacetylene **2a** (46 μL, 0.40 mmol, 1.5 equiv) afforded **6j** as a white solid (69 mg, 88%). <sup>1</sup>H NMR (400 MHz, DMSO-d<sub>6</sub>): 9.08 (s, 1H), 8.70 (s, 1H), 7.99-7.96 (m, 3H), 7.78-7.73 (m, 1H), 7.57 (d, 1H, *J* =

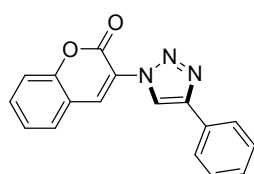

8.6 Hz), 7.52-7.48 (m, 3H), 7.40 (d, 1H,  $J = 7.3$  Hz);  $^{13}\text{C}$  NMR (100 MHz, DMSO- $d_6$ ): 155.5, 152.2, 146.2, 135.0, 132.7, 130.0, 129.2, 128.7, 127.9, 125.1, 125.0, 122.8, 121.7, 117.8, 116.0; HRMS (ESI) calcd for  $\text{C}_{17}\text{H}_{12}\text{N}_3\text{O}_2[\text{M}+\text{H}]^+$ : 290.0930; found: 290.0911.

**((3aS,4S,6S,6aS)-6-(2-amino-6-oxo-1H-purin-9(6H)-yl)-2,2-dimethyltetrahydrofuro[3,4-d][1,3]dioxol-4-yl)methyl-4-(4-phenyl-1H-1,2,3-triazol-1-yl)butanoate (6k):** Following the GP-2, ((3aS,4S,6S,6aS)-6-(2-amino-6-oxo-1H-purin-9(6H)-yl)-2,2-dimethyltetrahydrofuro[3,4-d][1,3]dioxol-4-

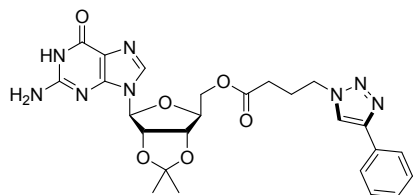

yl)methyl 4-azidobutanoate **4f** (50 mg, 0.12 mmol, 1 equiv), phenylacetylene **2a** (20  $\mu\text{L}$ , 0.17 mmol, 1.5 equiv) afforded **6k** as a sticky solid (50 mg, 77%).  $^1\text{H}$  NMR (400 MHz, DMSO- $d_6$ ): 10.7 (br s, 1H), 8.46 (s, 1H), 7.74 (d, 2H,  $J = 6.1$  Hz), 7.38-7.22 (m, 5H), 6.52 (s, 2H), 5.98 (br s, 1H), 5.14-5.02 (m, 2H), 4.32 (s, 2H), 4.17 (s, 2H),

4.04 (d, 1H,  $J = 15.8$  Hz), 2.26 (s, 2H), 1.99 (s, 2H), 1.40 (s, 3H), 1.20 (s, 3H);  $^{13}\text{C}$  NMR (125 MHz,  $\text{CDCl}_3$ ): 171.4, 131.9, 131.3, 130.4, 128.4, 128.3, 127.4, 124.7, 121.0, 112.9, 83.9, 80.8, 80.3, 63.7, 48.3, 29.8, 26.6, 24.9, 24.6; HRMS (ESI) calcd for  $\text{C}_{25}\text{H}_{29}\text{N}_8\text{O}_6[\text{M}+\text{H}]^+$ : 537.2210; found: 537.2205.

**((3aS,4S,6S,6aS)-6-(2-amino-6-oxo-1H-purin-9(6H)-yl)-2,2-dimethyltetrahydrofuro[3,4-d][1,3]dioxol-4-yl)methyl-4-(4-(9H-carbazol-3-yl)-1H-1,2,3-triazol-1-yl)butanoate (6l):** Following the GP-2, ((3aS,4S,6S,6aS)-6-(2-amino-6-oxo-1H-purin-9(6H)-yl)-

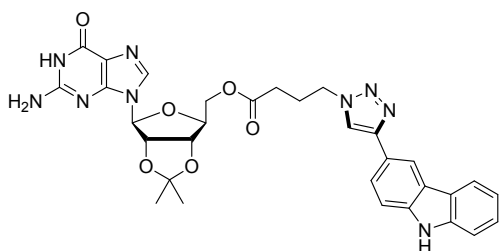

2,2-dimethyltetrahydrofuro[3,4-d][1,3]dioxol-4-yl)methyl 4-azidobutanoate **4f** (50 mg, 0.12 mmol, 1 equiv), 3-ethynyl-9H-carbazole **5d** (33 mg, 0.17 mmol, 1.5 equiv) afforded **6l** as a sticky solid (56mg, 74%).  $^1\text{H}$  NMR (500 MHz,  $\text{CDCl}_3$ ): 11.32

(s, 1H), 10.77 (s, 1H), 8.58-8.53 (m, 2H), 8.15 (s, 1H), 7.88 (s, 1H), 7.54-7.469 (m, 3H), 7.41-7.38 (m, 1H), 7.19-7.16 (m, 1H), 6.57 (s, 2H), 6.05 (s, 1H), 5.20 (s, 1H), 5.14 (s, 1H), 4.43 (s, 2H), 4.13 (s, 1H), 3.16 (s, 2H), 2.38 (s, 2H), 2.12 (s, 2H), 1.49 (s, 3H), 1.29 (s, 3H),  $^{13}\text{C}$  NMR (400 MHz, DMSO- $d_6$ ): 171.9, 156.7, 153.7, 150.5, 147.7, 140.1, 139.4, 136.3, 125.8, 123.3, 122.7, 122.4, 121.6, 120.3, 120.2, 118.7, 116.9, 113.3, 11.3, 111.1, 88.4, 84.2, 83.7, 81.1, 64.1, 54.9, 48.6, 30.2, 27.0, 25.3; HRMS (ESI) calcd for  $\text{C}_{31}\text{H}_{32}\text{N}_9\text{O}_6[\text{M}+\text{H}]^+$ : 626.2476; found: 626.2470.

**4-(4-(2-Bromoethyl)-1H-1,2,3-triazol-1-yl)aniline (6m):** Following the GP-2, 4-azidoaniline **1c** (50 mg, 0.37 mmol, 1 equiv), 4-bromobut-1-yne **5e** (74 mg, 0.56 mmol, 1.5 equiv)

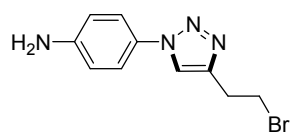

afforded **6m** as a white solid (71 mg, 72%).  $^1\text{H}$  NMR (400 MHz,  $\text{CDCl}_3$ ): 7.76 (s, 1H), 7.46 (d, 2H,  $J = 8.8$  Hz), 6.76 (d, 2H,  $J = 8.8$  Hz), 3.70 (t, 2H,  $J = 6.8$  Hz),



3.37 (t, 2H,  $J = 6.3$  Hz);  $^{13}\text{C}$  NMR (100 MHz,  $\text{CDCl}_3$ ): 147.2, 145.1, 128.9, 122.4, 120.1, 115.4, 31.6, 29.7; HRMS (ESI) calcd for  $\text{C}_{10}\text{H}_{12}\text{BrN}_4[\text{M}+\text{H}]^+$ : 267.0240; found: 267.0249.

**4-(4-Cyclopropyl-1H-1,2,3-triazol-1-yl)aniline (6n):** Following the GP-2, 4-azidoaniline **1c** (50 mg, 0.37 mmol, 1 equiv), ethynylcyclopropane **5f** (37 mg, 0.56 mmol, 1.5 equiv)

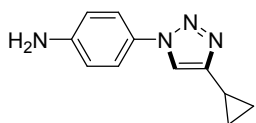

afforded **6n** as a white solid (51 mg, 70%).  $^1\text{H}$  NMR (400 MHz,  $\text{CDCl}_3$ ): 7.53 (s, 1H), 7.42 (d, 2H,  $J = 8.8$  Hz), 6.74 (d, 2H,  $J = 8.8$  Hz), 2.04-1.98 (m, 1H), 0.99-0.96 (m, 2H), 0.92-0.89 (m, 2H);  $^{13}\text{C}$  NMR (100 MHz,  $\text{DMSO}-d_6$ ): 150.7, 146.9,

129.2, 122.3, 118.2, 115.4, 7.9, 6.9; HRMS (ESI) calcd for  $\text{C}_{11}\text{H}_{13}\text{N}_4[\text{M}+\text{H}]^+$ : 201.1135; found: 201.1150.

**Ethyl 1-(4-aminophenyl)-1H-1,2,3-triazole-4-carboxylate (6o):** Following the GP-2, 4-azidoaniline **1c** (50 mg, 0.37 mmol, 1 equiv), ethyl propiolate **5g** (54 mg, 0.56 mmol, 1.5 equiv) afforded **6o** as a white

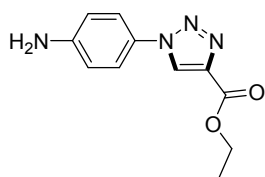

solid (64 mg, 75%).  $^1\text{H}$  NMR (400 MHz,  $\text{CDCl}_3$ ): 8.36 (s, 1H), 7.47 (d, 2H,  $J = 8.3$  Hz), 6.76 (d, 2H,  $J = 8.8$  Hz), 4.47-4.44 (m, 2H), 1.44-1.40 (m, 3H);  $^{13}\text{C}$  NMR (100 MHz,  $\text{CDCl}_3$ ): 160.9, 147.9, 141.9, 127.7, 125.4, 122.7, 115.4, 61.5, 14.5; HRMS (ESI) calcd for  $\text{C}_{11}\text{H}_{13}\text{N}_4\text{O}_2[\text{M}+\text{H}]^+$ : 233.1033; found: 233.1025.

**N-phenyl-4-(4-phenyl-1H-1,2,3-triazol-1-yl)aniline (11a):** Following the GP-4, 4-azidoaniline **1c** (50

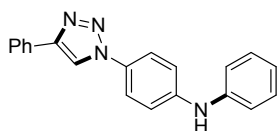

mg, 0.37 mmol, 1 equiv), phenylacetylene **2a** (64  $\mu\text{L}$ , 0.56 mmol, 1.5 equiv), iodobenzene **10a** (63  $\mu\text{L}$ , 0.56 mmol, 1.5 equiv) afforded **11a** as a brown solid (83 mg, 72%).  $^1\text{H}$  NMR (500 MHz,  $\text{CDCl}_3$ ): 8.11 (s, 1H), 7.92-7.90 (m, 2H),

7.65-7.63 (m, 2H), 7.48-7.45 (m, 2H), 7.38-7.32 (m, 4H), 7.18-7.14 (m, 3H), 7.05-7.02 (m, 1H);  $^{13}\text{C}$  NMR (125 MHz,  $\text{CDCl}_3$ ): 148.4, 129.8, 129.1, 128.4, 126.1, 124.1, 122.7, 122.3, 118.6, 117.8, 117.5, 112.0; HRMS (ESI) calcd for  $\text{C}_{20}\text{H}_{17}\text{N}_4$   $[\text{M}+\text{H}]^+$ : 313.1453; found: 313.1447.

**N-phenyl-4-(4-phenyl-1H-1,2,3-triazol-1-yl)aniline (11b):** Following the GP-4, 4-azidoaniline **1c** (50

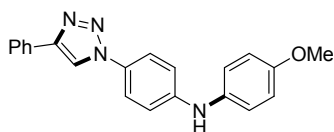

mg, 0.37 mmol, 1 equiv), phenylacetylene **2a** (64  $\mu\text{L}$ , 0.56 mmol, 1.5 equiv), 4-iodoanisole **10b** (132 mg, 0.56 mmol, 1.5 equiv) afforded **11b** as a brown

solid (99 mg, 78%).  $^1\text{H}$  NMR (500 MHz,  $\text{CDCl}_3$ ): 8.07 (s, 1H), 7.90 (d, 2H,  $J = 7.0$  Hz), 7.56 (d, 2H,  $J = 8.9$  Hz), 7.45 (t, 2H,  $J = 7.6$  Hz), 7.36 (t, 1H,  $J = 7.2$  Hz), 7.13 (d, 2H,  $J = 8.8$  Hz), 6.97 (d, 2H,  $J = 8.8$  Hz), 6.91 (d, 2H,  $J = 8.9$  Hz), 5.72 (br s, 1H), 3.82 (s, 3H);  $^{13}\text{C}$  NMR (125 MHz,  $\text{CDCl}_3$ ): 156.5, 148.2, 146.5, 134.7, 130.8, 129.3, 129.1, 128.4, 126.4, 123.8, 122.4, 117.8, 115.5, 115.1, 55.8; HRMS (ESI) calcd for  $\text{C}_{21}\text{H}_{19}\text{N}_4\text{O}$   $[\text{M}+\text{H}]^+$ : 343.1559; found: 343.1565.

**4-((4-(4-Phenyl-1H-1,2,3-triazol-1-yl)phenyl)amino)benzoic acid (11c):** Following the GP-4, 4-azidoaniline **1c** (50 mg, 0.37 mmol, 1 equiv), phenylacetylene **2a** (64  $\mu\text{L}$ , 0.56

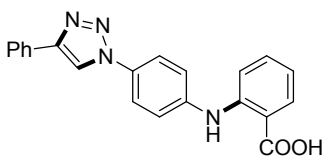

mmol, 1.5 equiv), 4-iodobenzoic acid **10c** (139 mg, 0.56 mmol, 1.5 equiv) afforded **11c** as a white solid (88 mg, 67%).  $^1\text{H}$  NMR (500 MHz,  $\text{CDCl}_3$ ): 8.07 (s, 1H), 8.05-8.04 (m, 1H), 8.01 (dd, 1H,  $J = 1.9, 6.3$  Hz), 7.93 (dd, 1H,  $J$

= 1.9, 6.3Hz), 7.90-7.88 (m, 1H), 7.54-7.49 (m, 2H), 7.47-7.43 (m, 3H), 7.22-7.18 (m, 1H), 7.00 (d, 1H,  $J = 8.2$  Hz), 6.93 (t, 1H,  $J = 7.6$  Hz), 6.79 (d, 1H,  $J = 8.9$  Hz);  $^{13}\text{C}$  NMR (125 MHz,  $\text{CDCl}_3$ ): 174.3, 170.7, 162.3, 142.1, 136.8, 133.6, 133.5, 131.1, 129.1, 128.5, 128.2, 126.5, 122.5, 119.7, 117.9, 115.6, 111.8, 94.8; HRMS (ESI) calcd for  $\text{C}_{21}\text{H}_{17}\text{N}_4\text{O}_2$   $[\text{M}+\text{H}]^+$ : 357.1352; found: 357.1366.

**N-(4-methoxyphenyl)-3-(4-phenyl-1H-1,2,3-triazol-1-yl)aniline (11d):** Following the GP-4, 3-

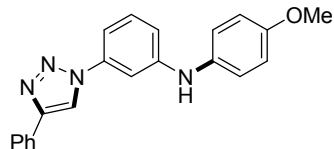

azidoaniline **1k** (50 mg, 0.37 mmol, 1 equiv), phenylacetylene **2a** (64  $\mu\text{L}$ , 0.56 mmol, 1.5 equiv), 4-iodoanisole **10b** (132 mg, 0.56 mmol, 1.5 equiv)

afforded **11d** as a white solid (87 mg, 70%).  $^1\text{H}$  NMR (500 MHz,  $\text{CDCl}_3$ ): 8.08 (s, 1H), 7.89 (d, 2H,  $J = 7.6$  Hz), 7.57-7.55 (m, 3H), 7.45 (t, 2H,  $J = 7.6$  Hz), 7.13 (d, 2H,  $J = 8.8$  Hz), 6.97 (d, 2H,  $J = 8.2$  Hz), 6.91 (d, 2H,  $J = 8.9$  Hz), 3.83 (s, 3H);  $^{13}\text{C}$  NMR (125 MHz,  $\text{CDCl}_3$ ): 156.4, 134.5, 130.6, 129.0, 128.4, 127.7, 127.6, 126.0, 123.8, 123.7, 122.4, 117.6, 116.1, 115.7, 115.4, 115.3, 115.0, 55.7; HRMS (ESI) calcd for  $\text{C}_{21}\text{H}_{19}\text{N}_4\text{O}$   $[\text{M}+\text{H}]^+$ : 343.1559; found: 343.1567.

### 13.0 NMR spectra of all compounds

### $^1\text{H}$ and $^{13}\text{C}$ NMR of S3:

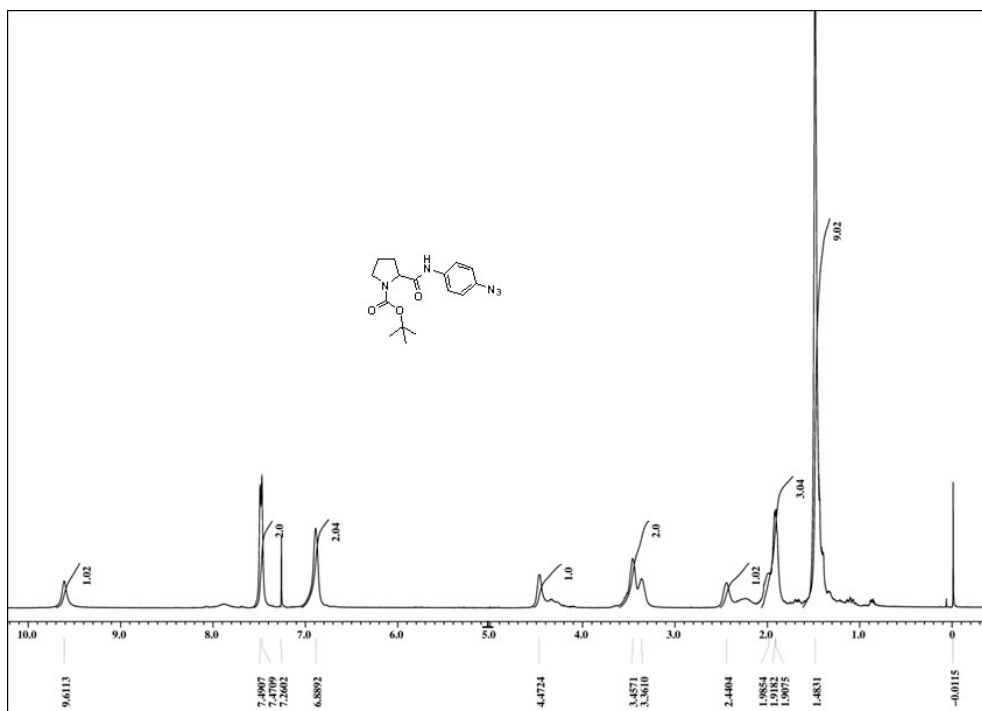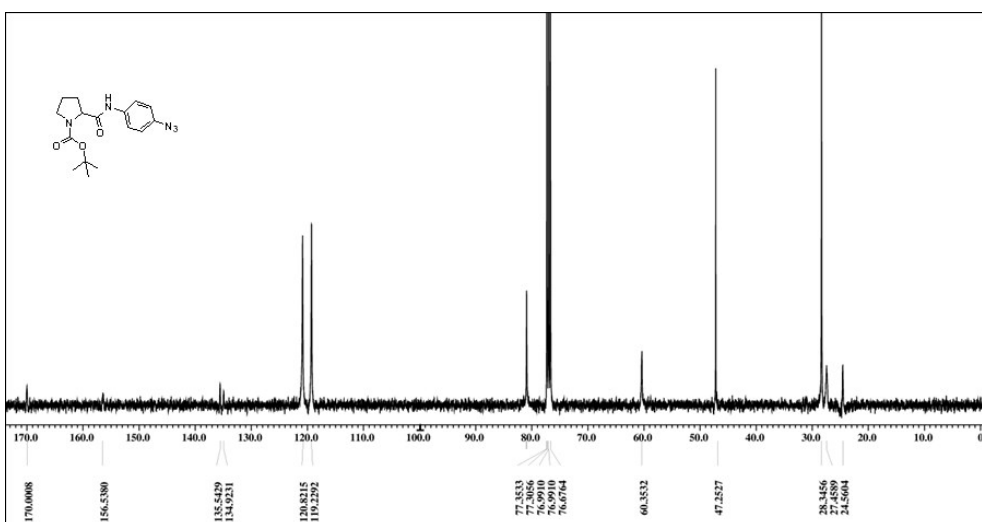

### $^1\text{H}$ and $^{13}\text{C}$ NMR of S5:

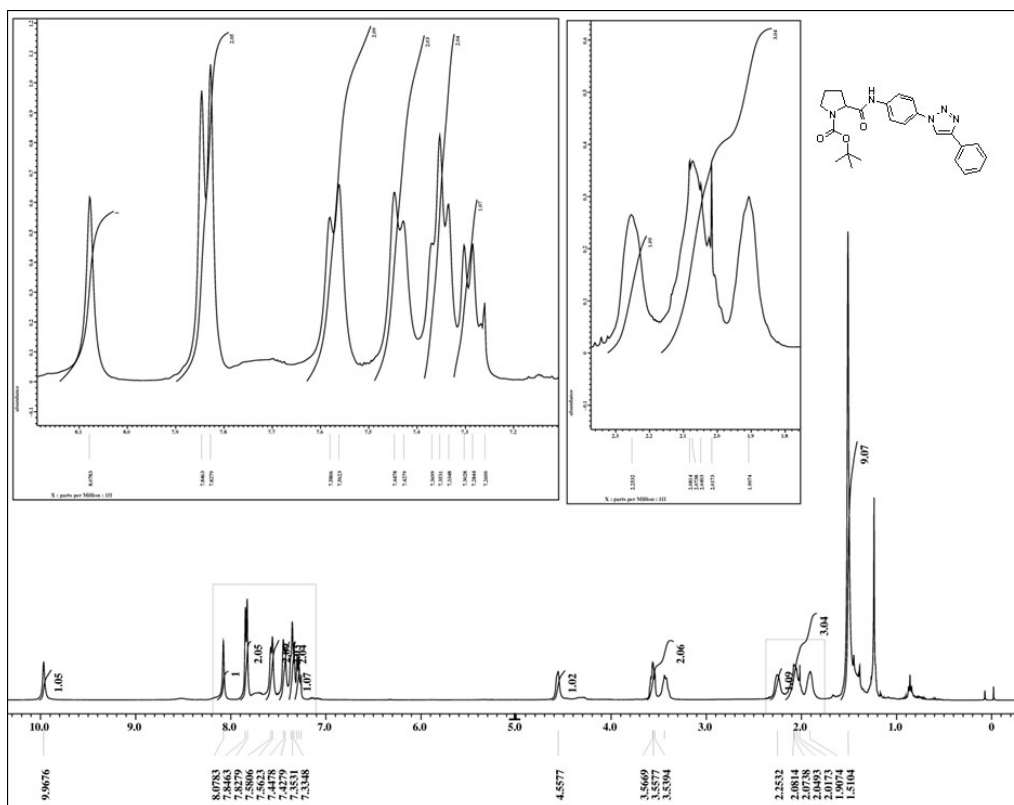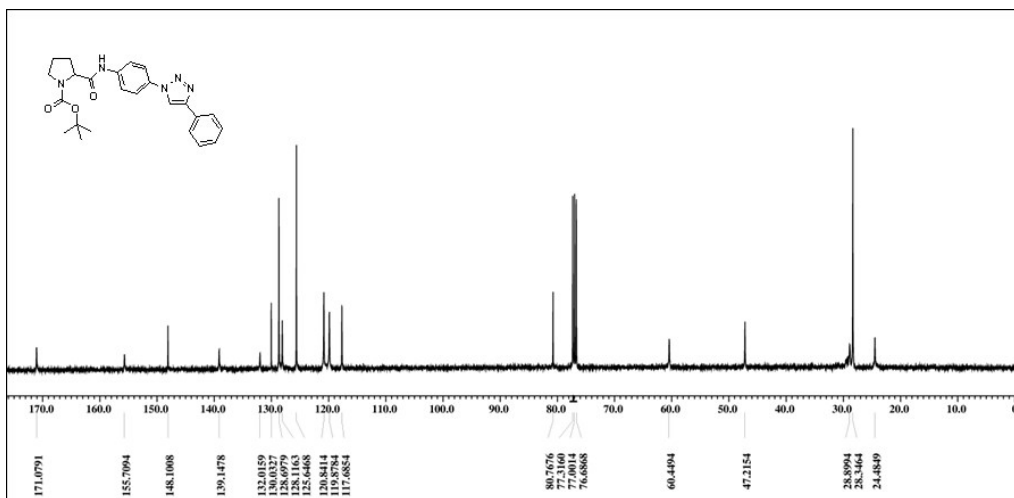

# $^1\text{H}$ and $^{13}\text{C}$ NMR of Pro-1:

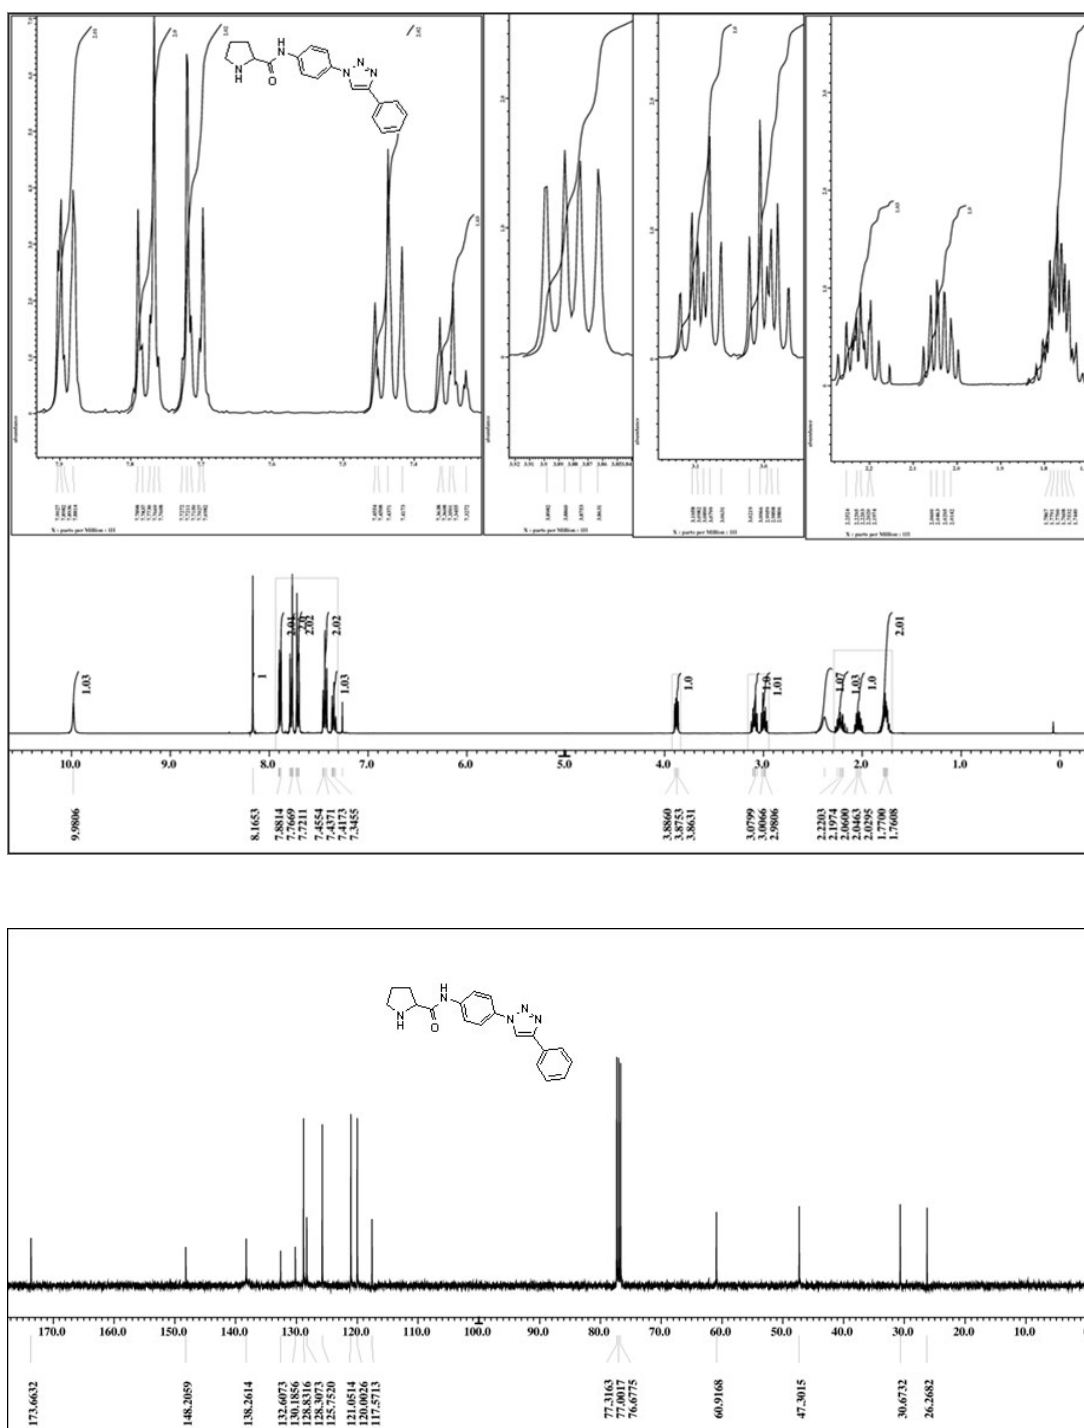

**<sup>1</sup>H and <sup>13</sup>C NMR of S7:**

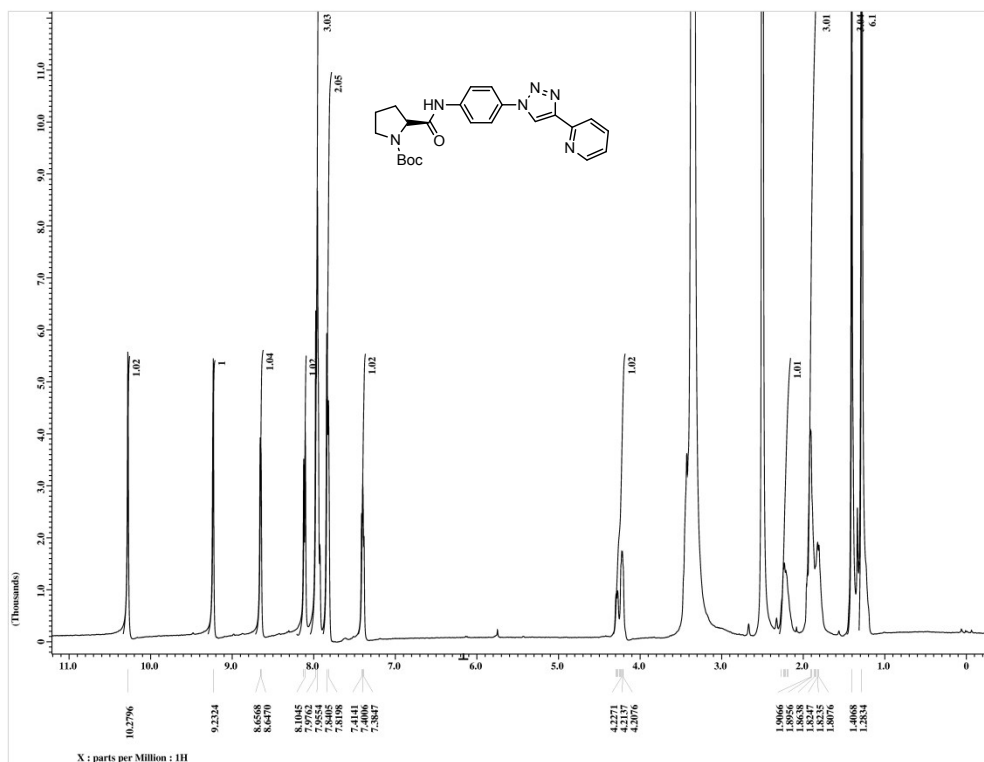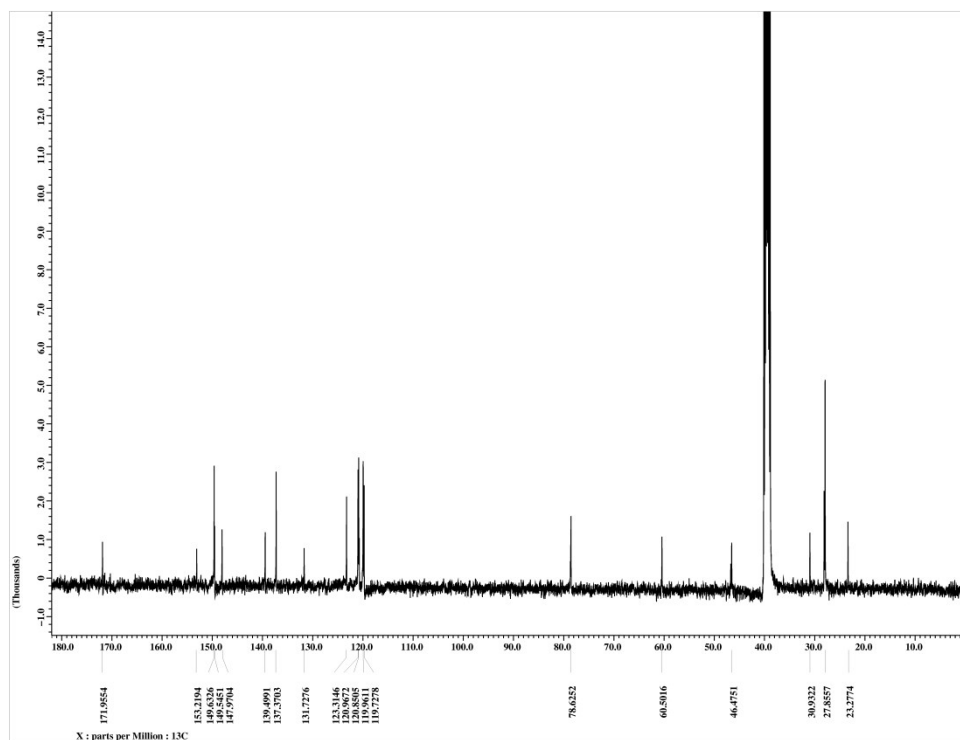

# <sup>1</sup>H and <sup>13</sup>C NMR of Pro-2:

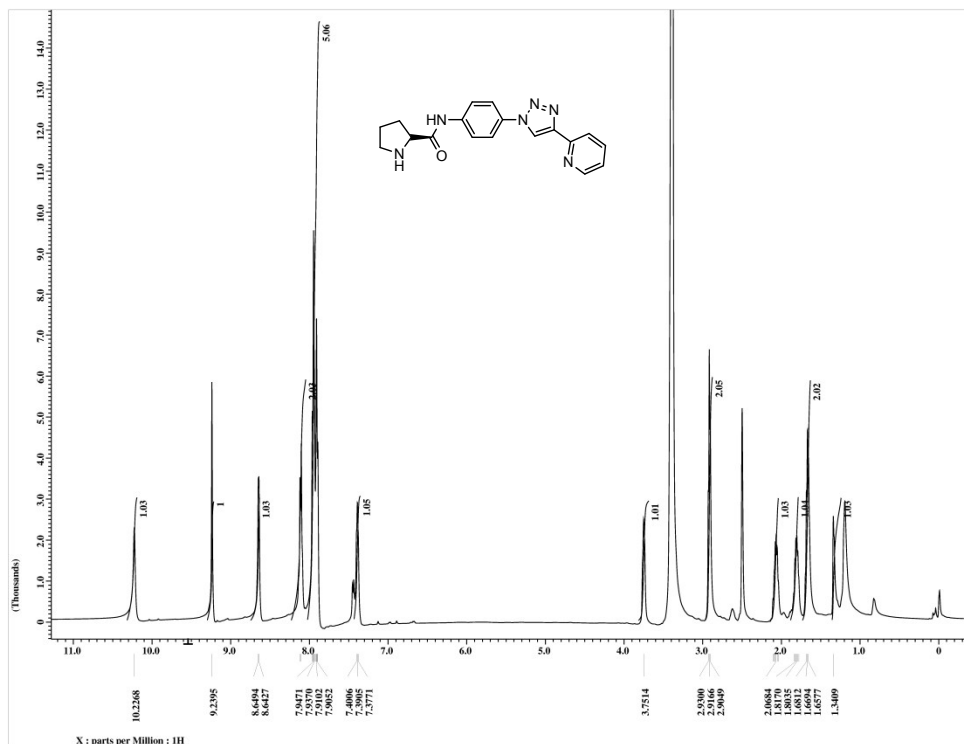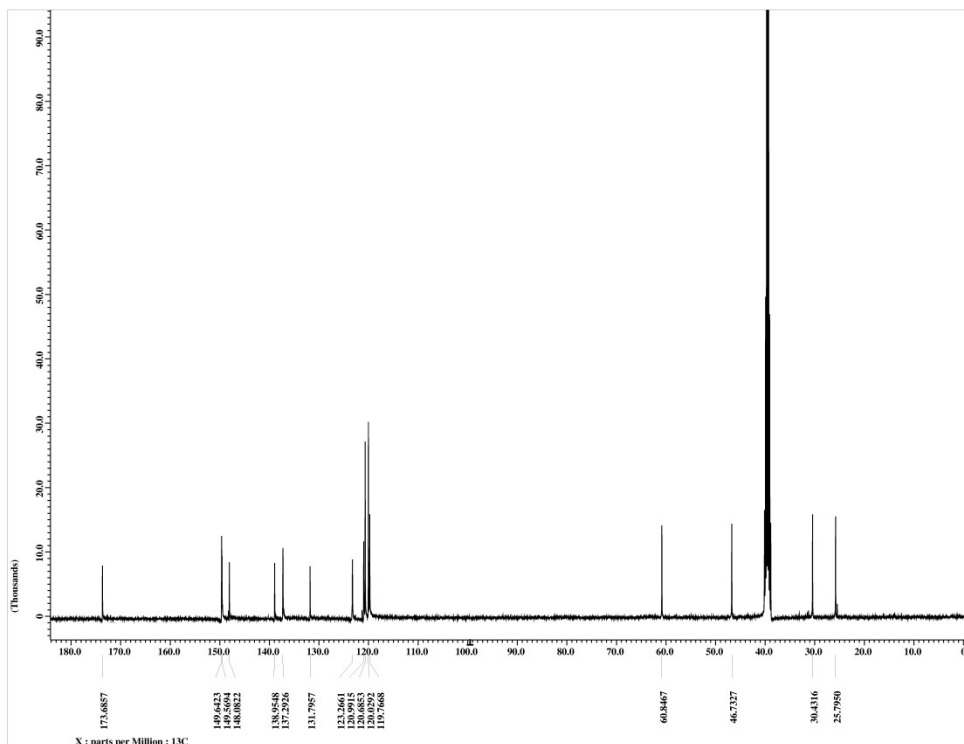

# $^1\text{H}$ and $^{13}\text{C}$ NMR of S9:

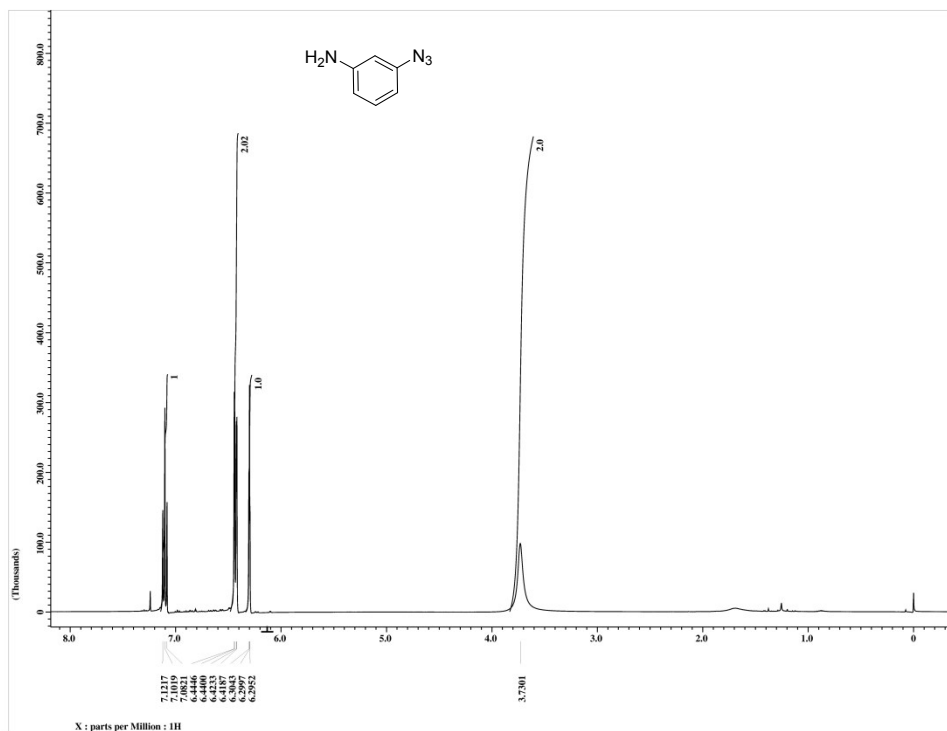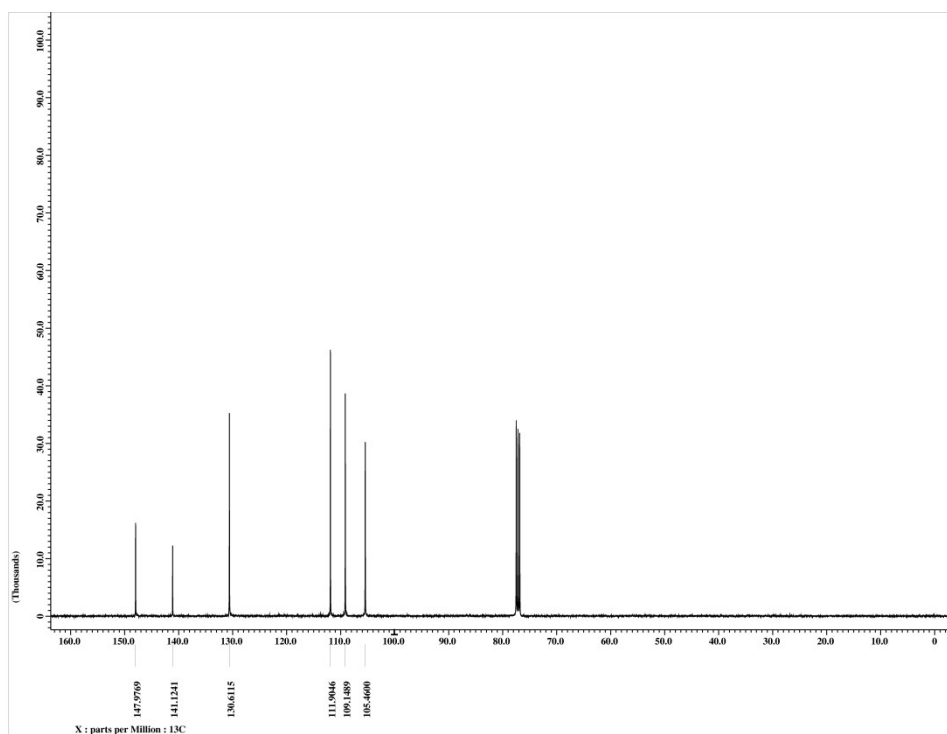



# <sup>1</sup>H and <sup>13</sup>C NMR of S10:

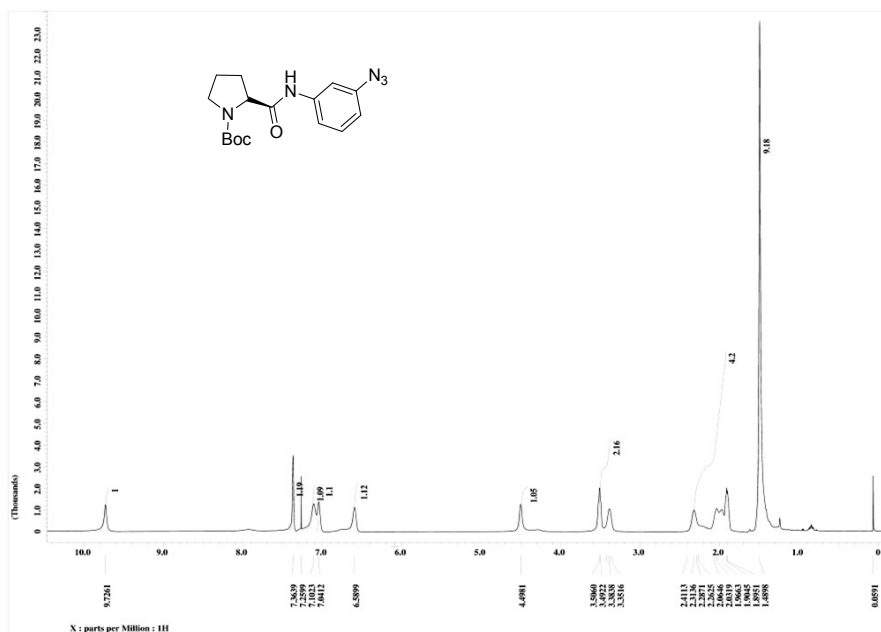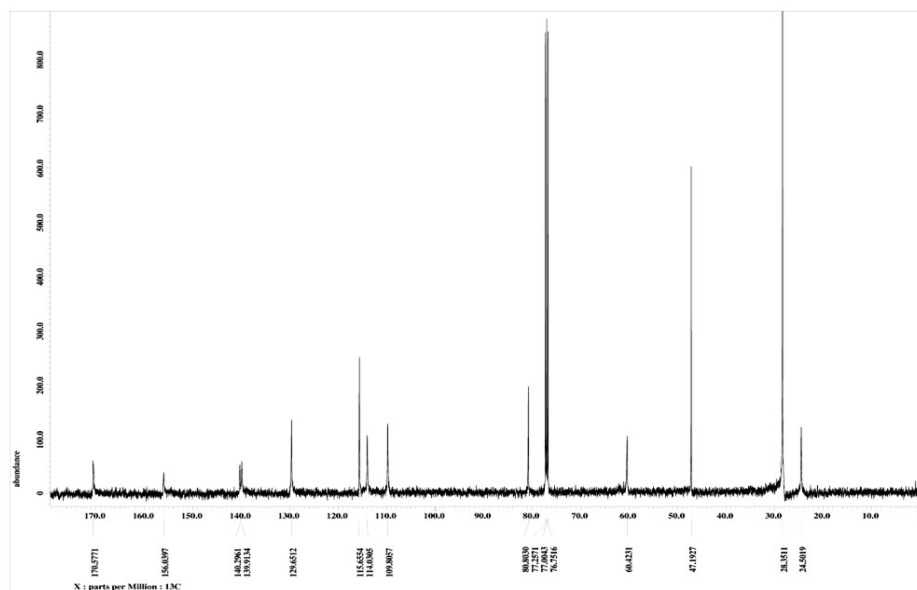

# <sup>1</sup>H and <sup>13</sup>C NMR of Pro-3:

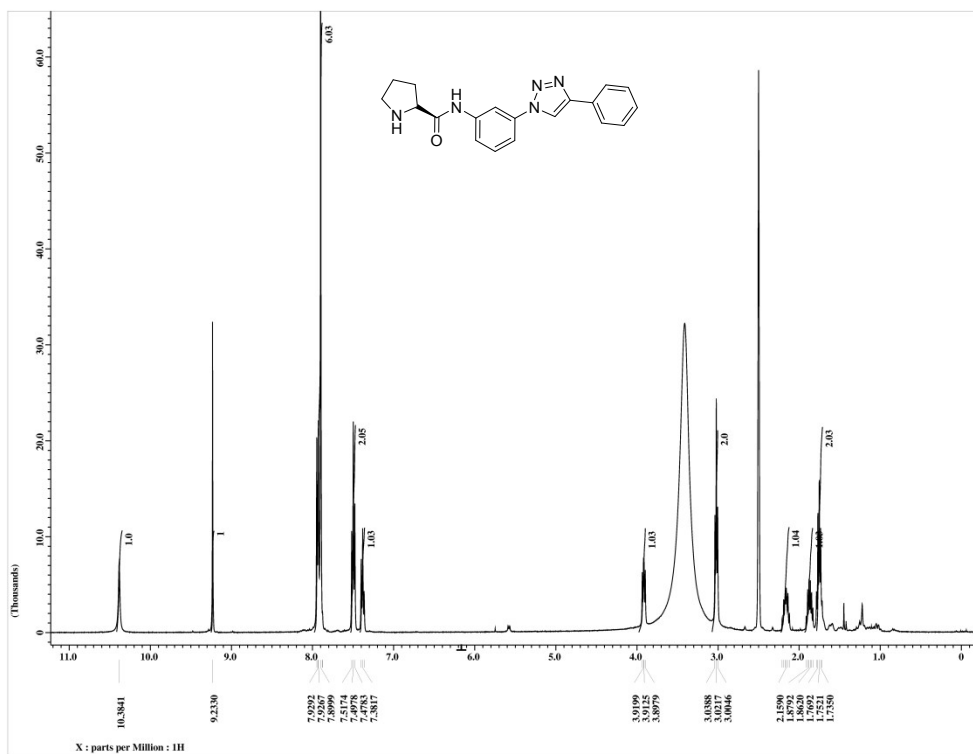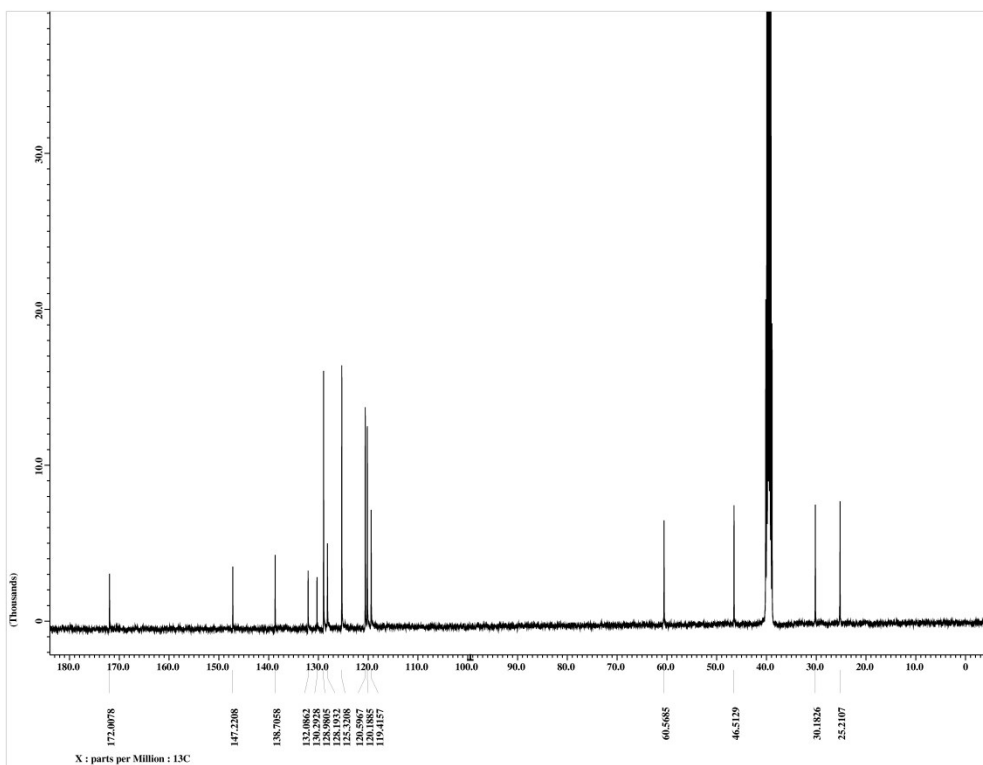

**$^1\text{H}$  and  $^{13}\text{C}$  NMR of 3a:**

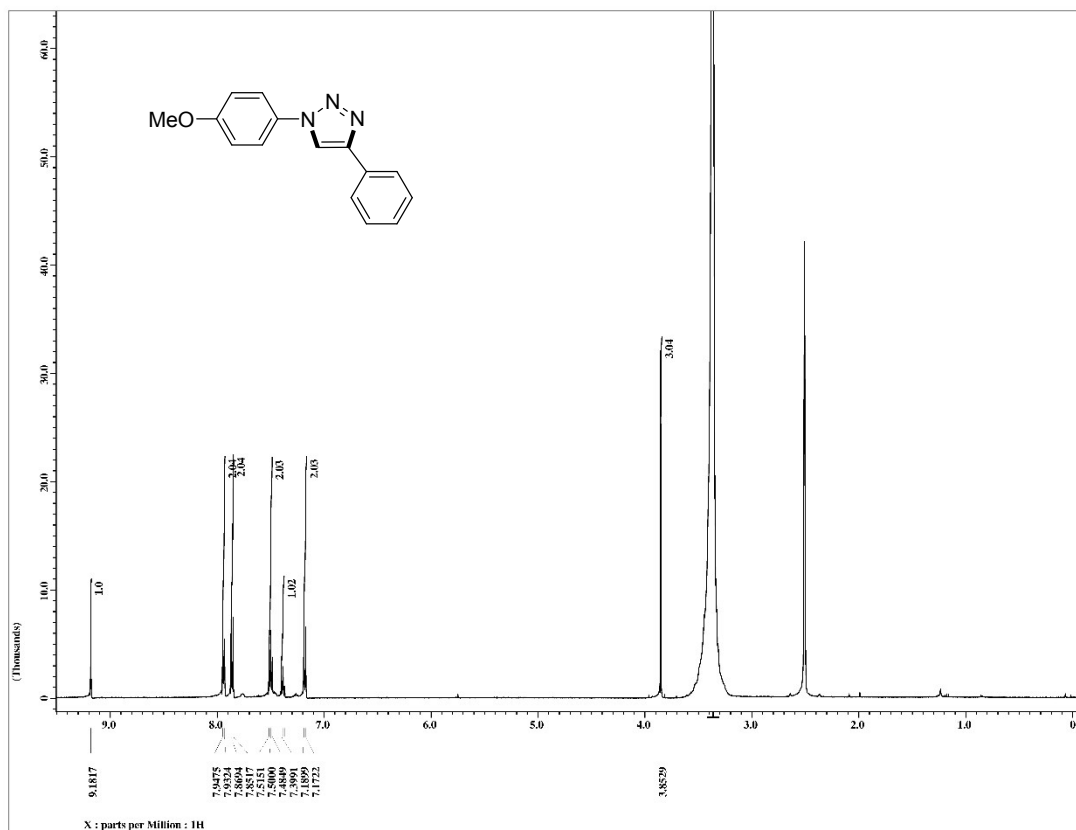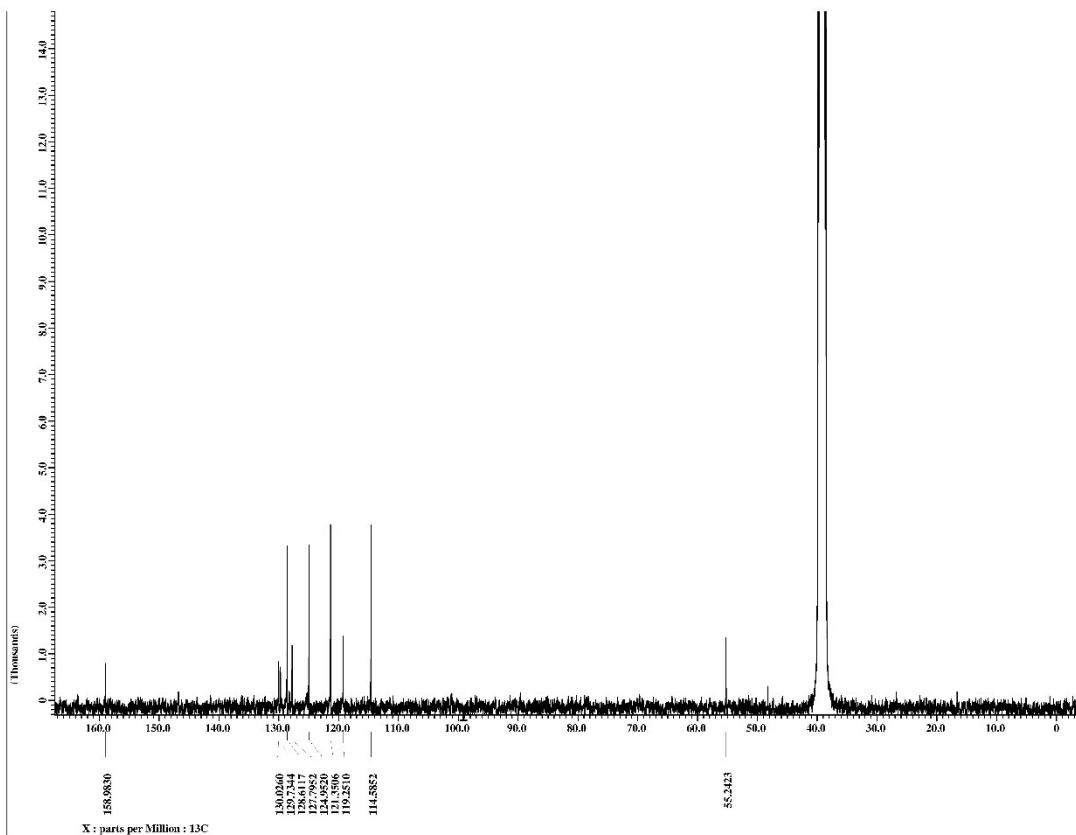

# <sup>1</sup>H and <sup>13</sup>C NMR of 3b:

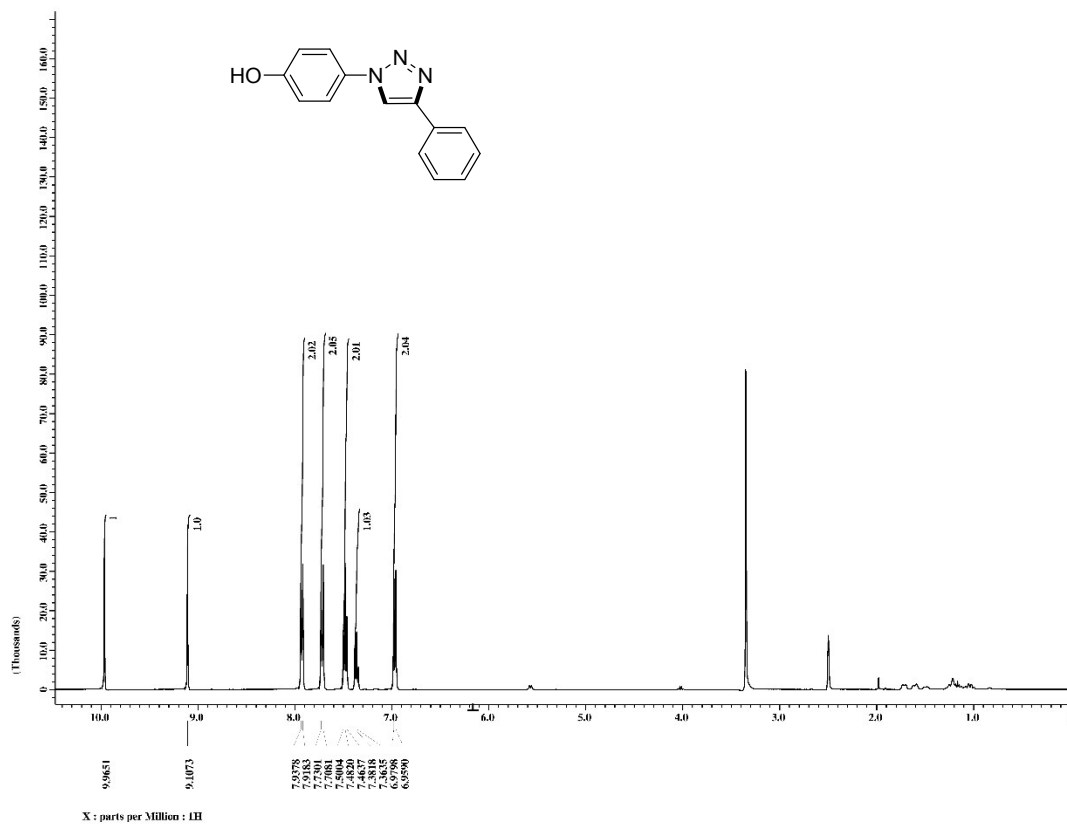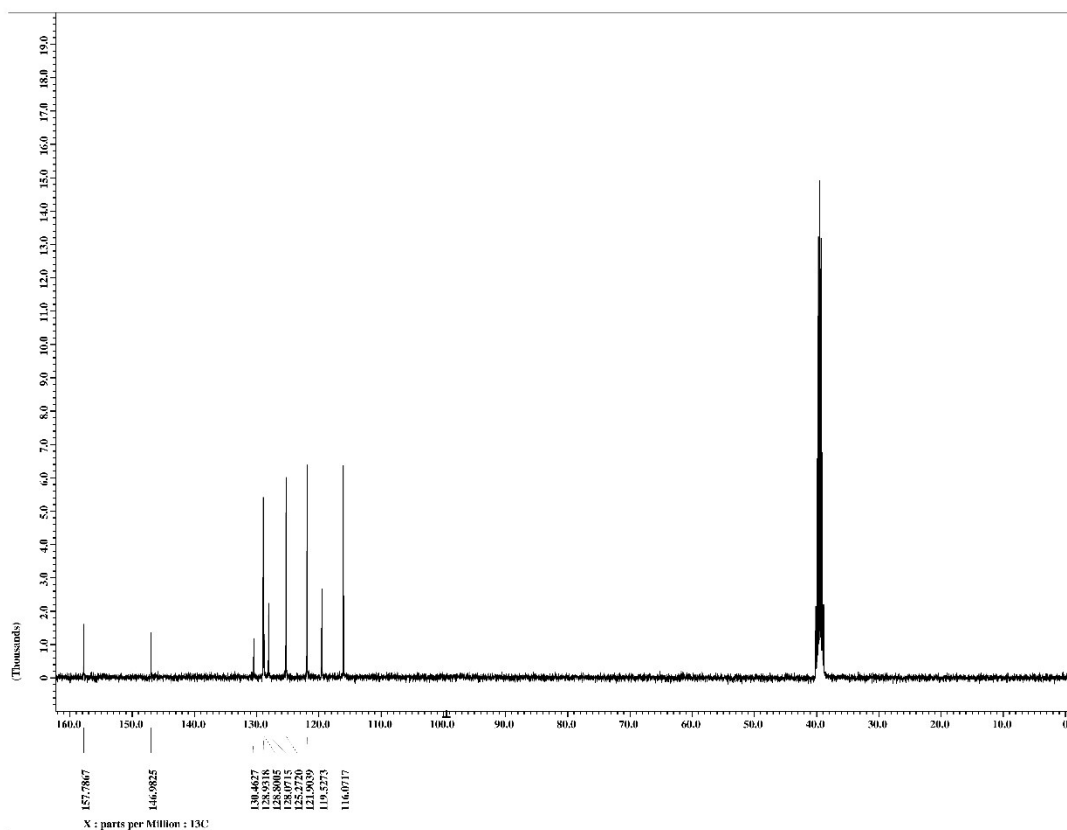

# <sup>1</sup>H and <sup>13</sup>C NMR of 3c:

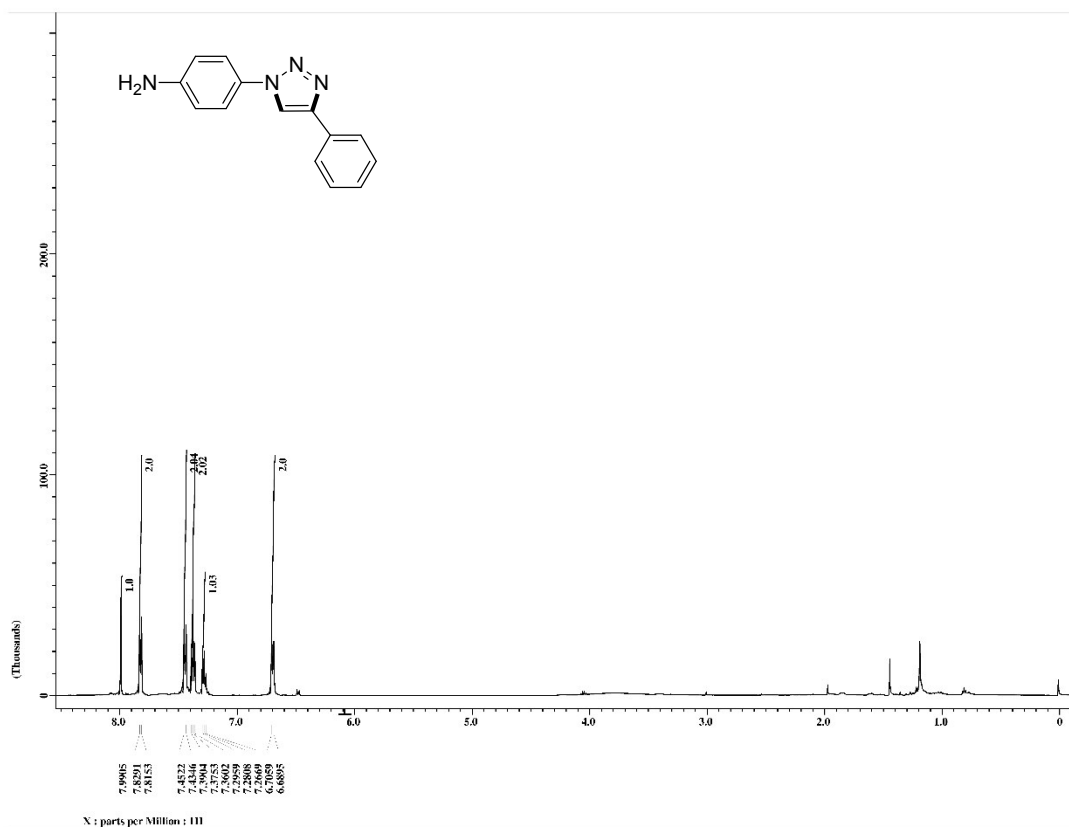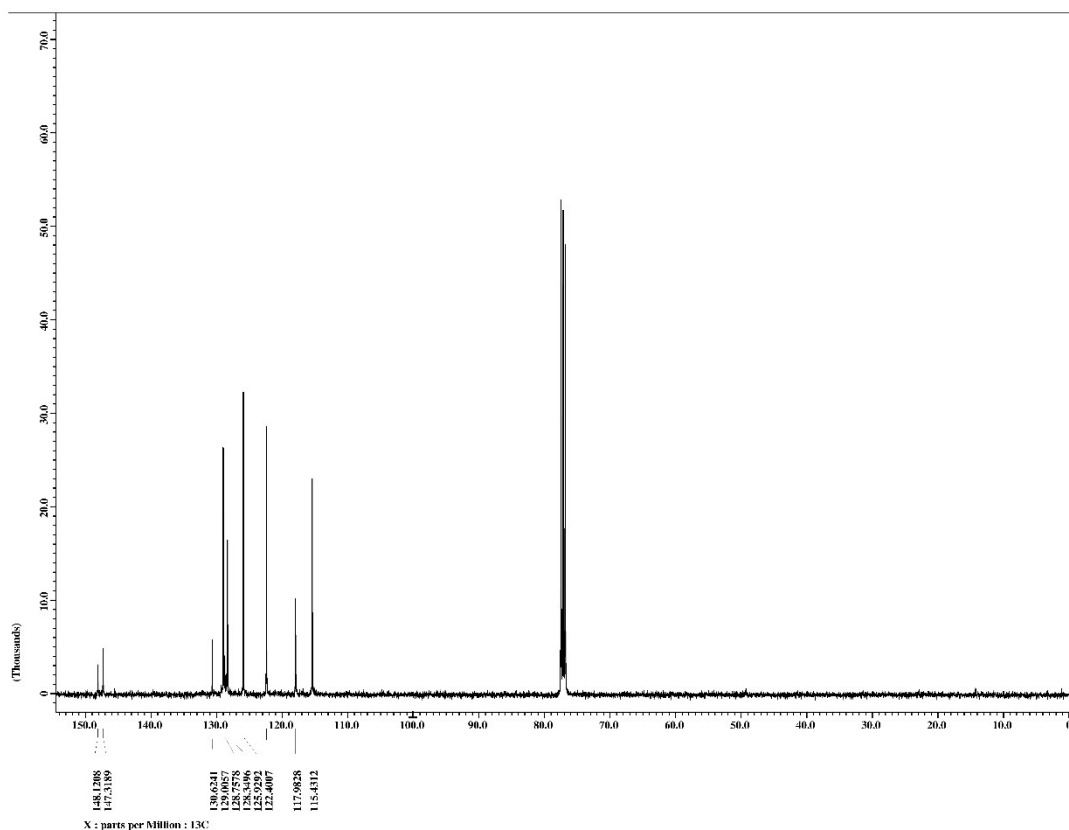

# <sup>1</sup>H and <sup>13</sup>C NMR of 3d:

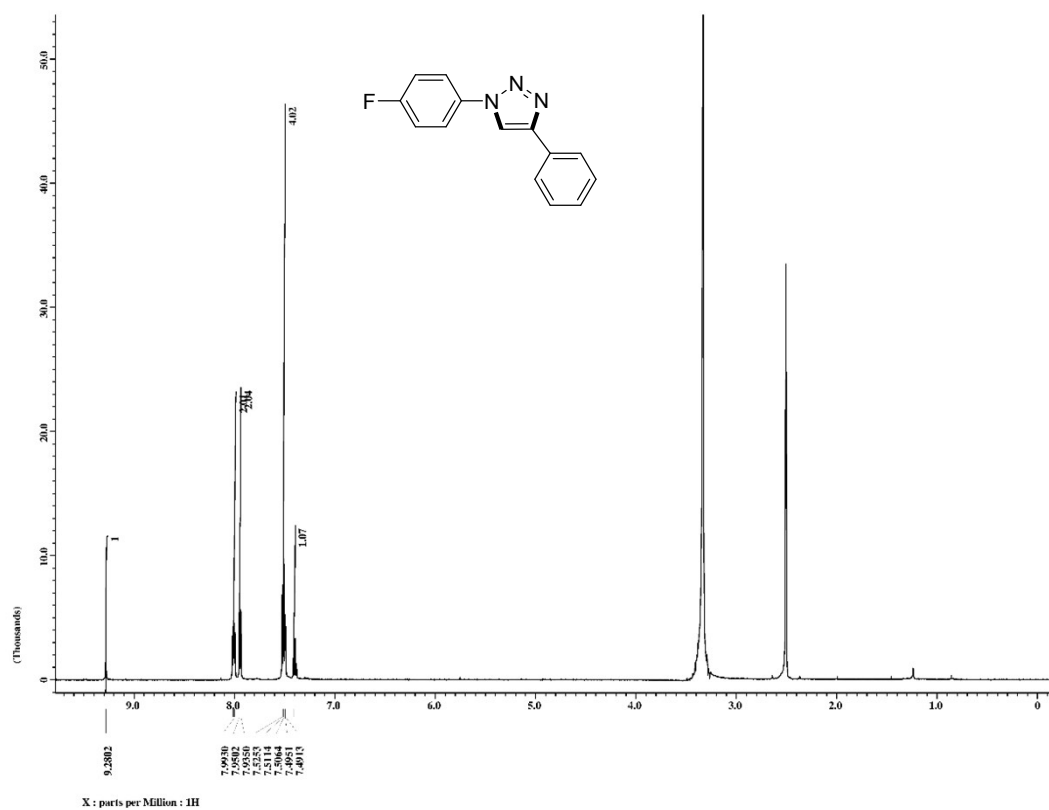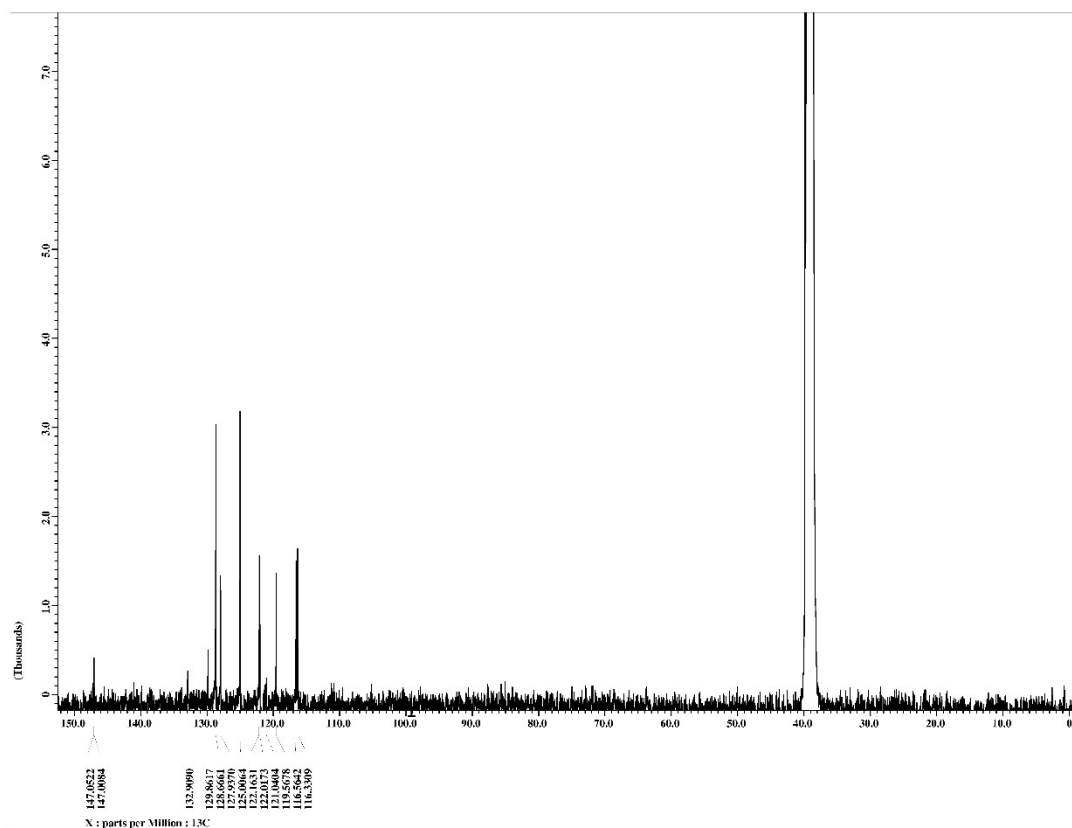

# $^1\text{H}$ and $^{13}\text{C}$ NMR of 3e:

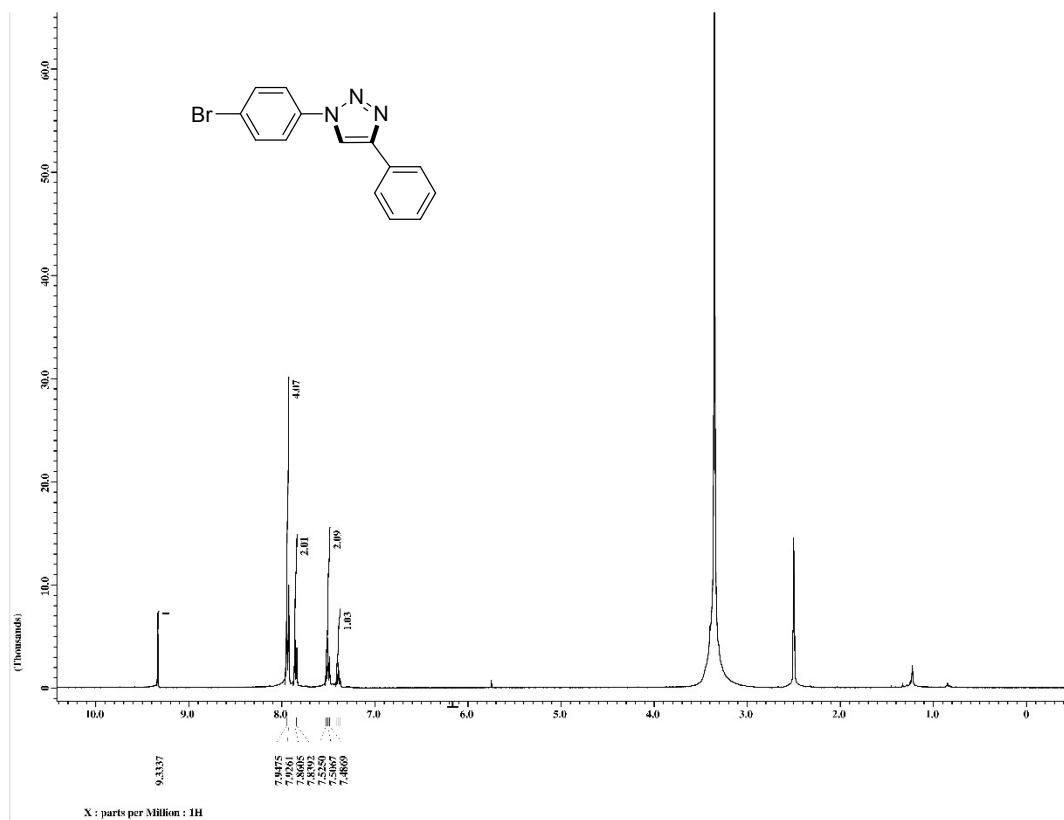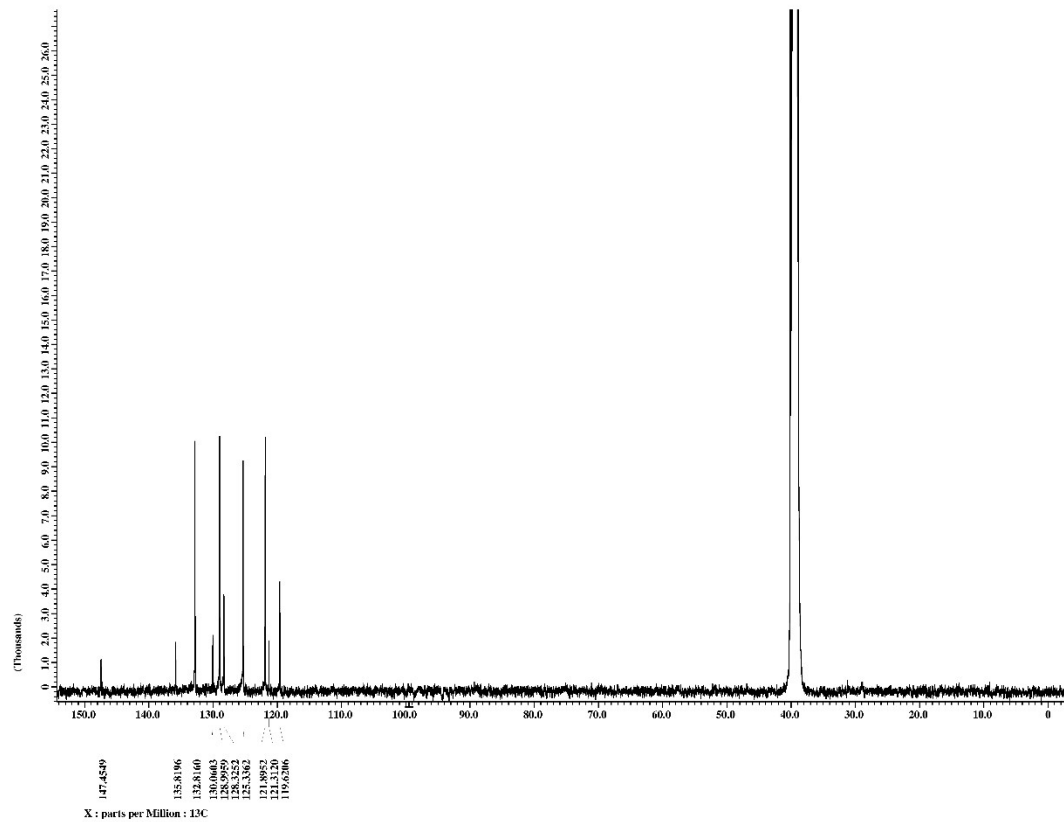



# <sup>1</sup>H and <sup>13</sup>C NMR of 3f:

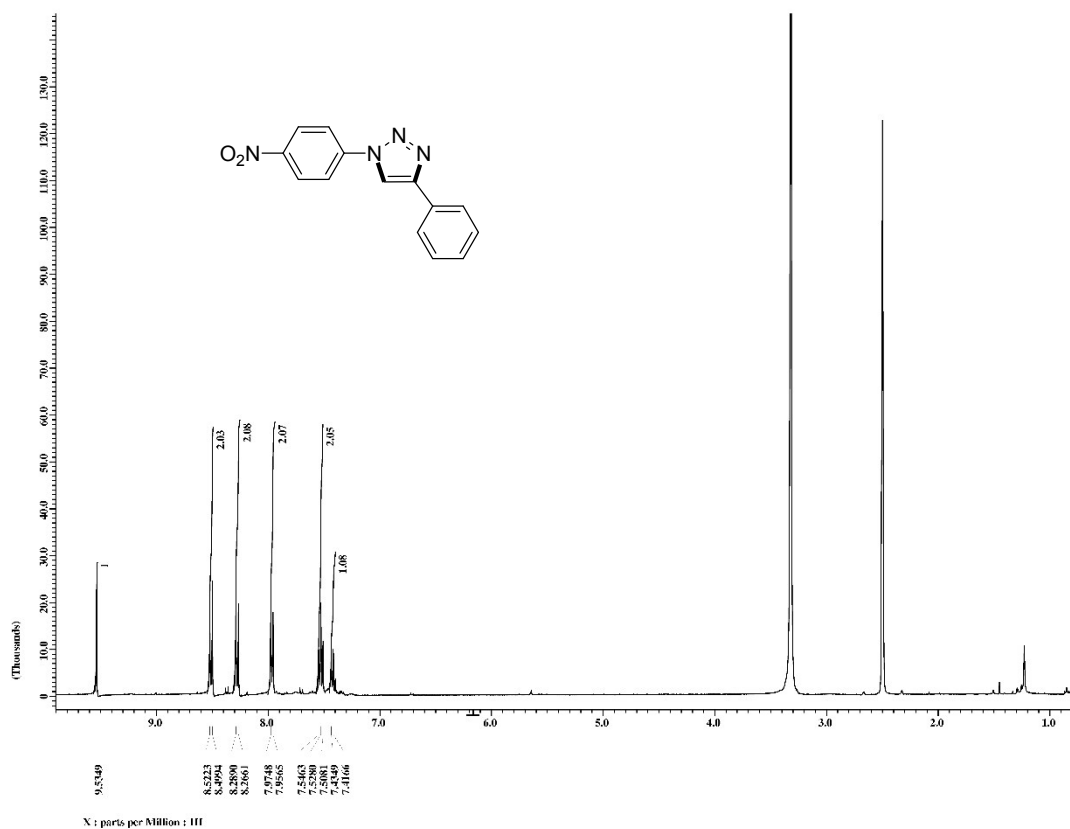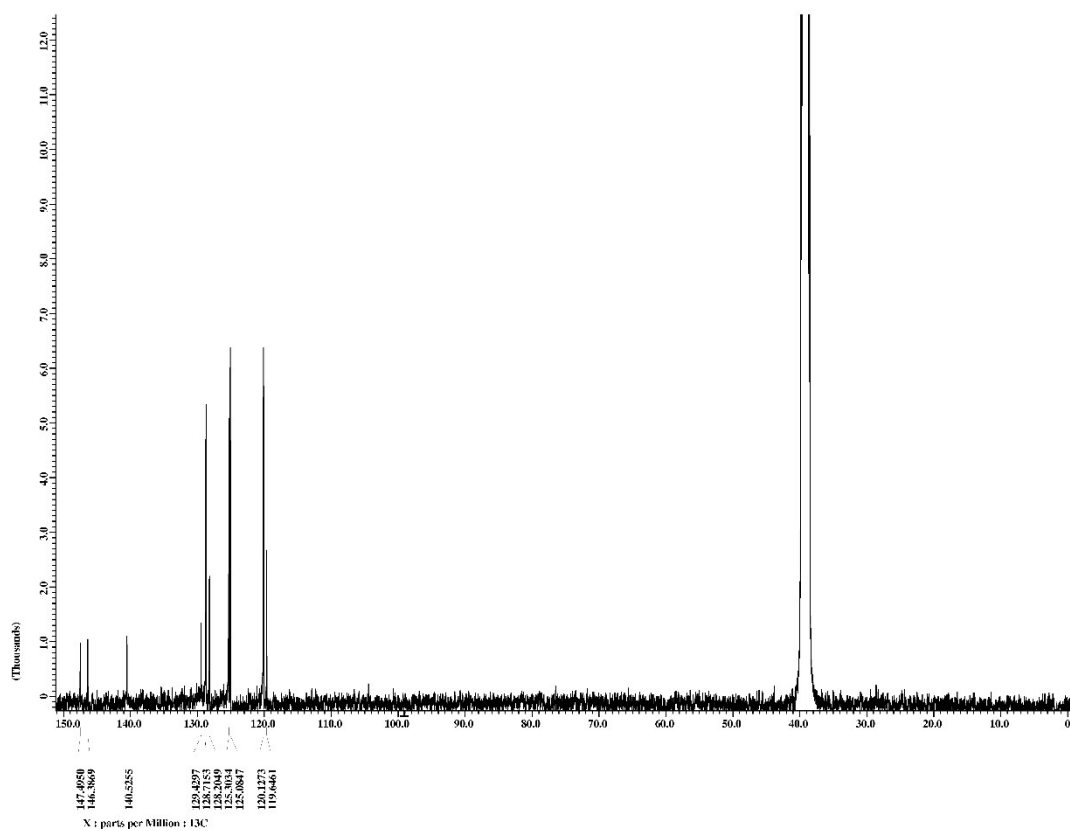

# <sup>1</sup>H and <sup>13</sup>C NMR of 3g:

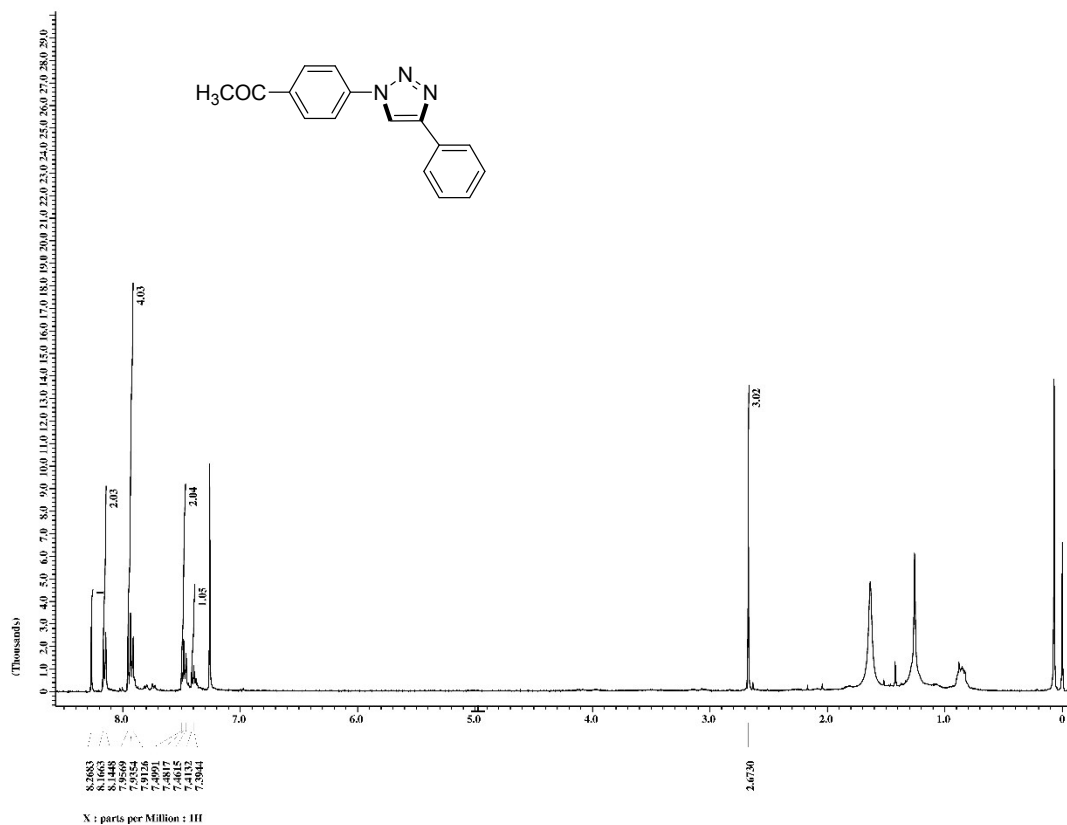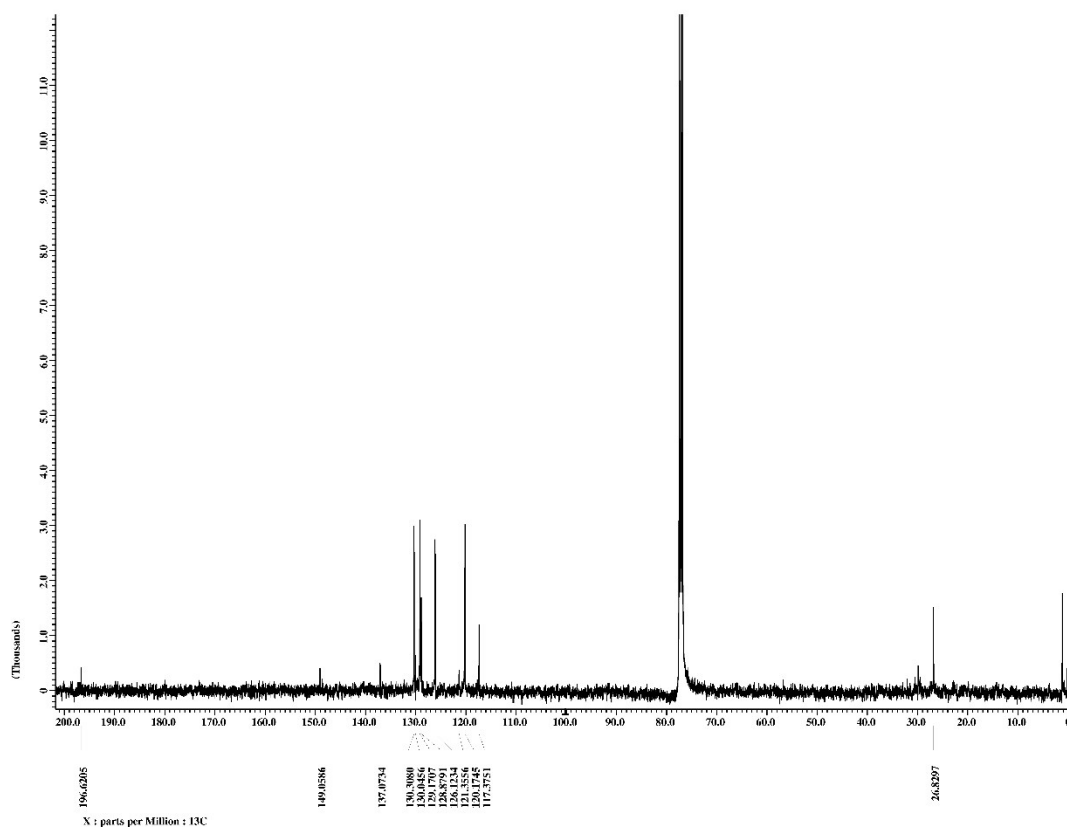



# $^1\text{H}$ and $^{13}\text{C}$ NMR of 3i:

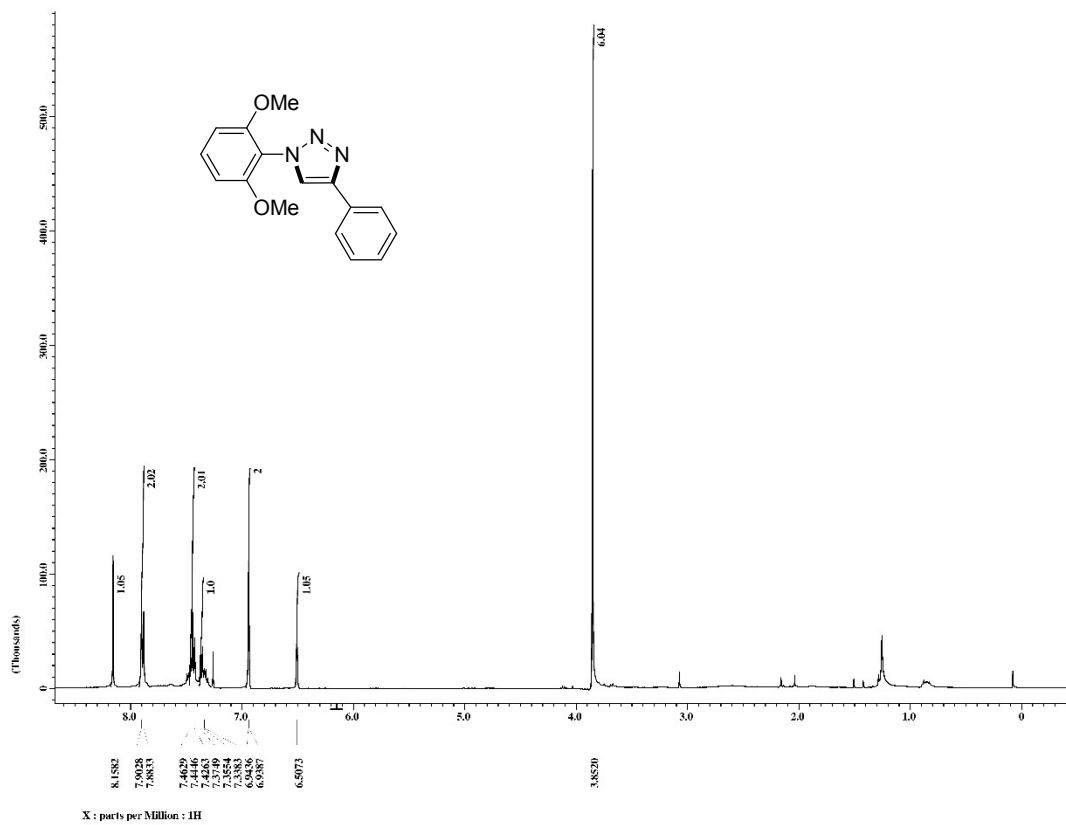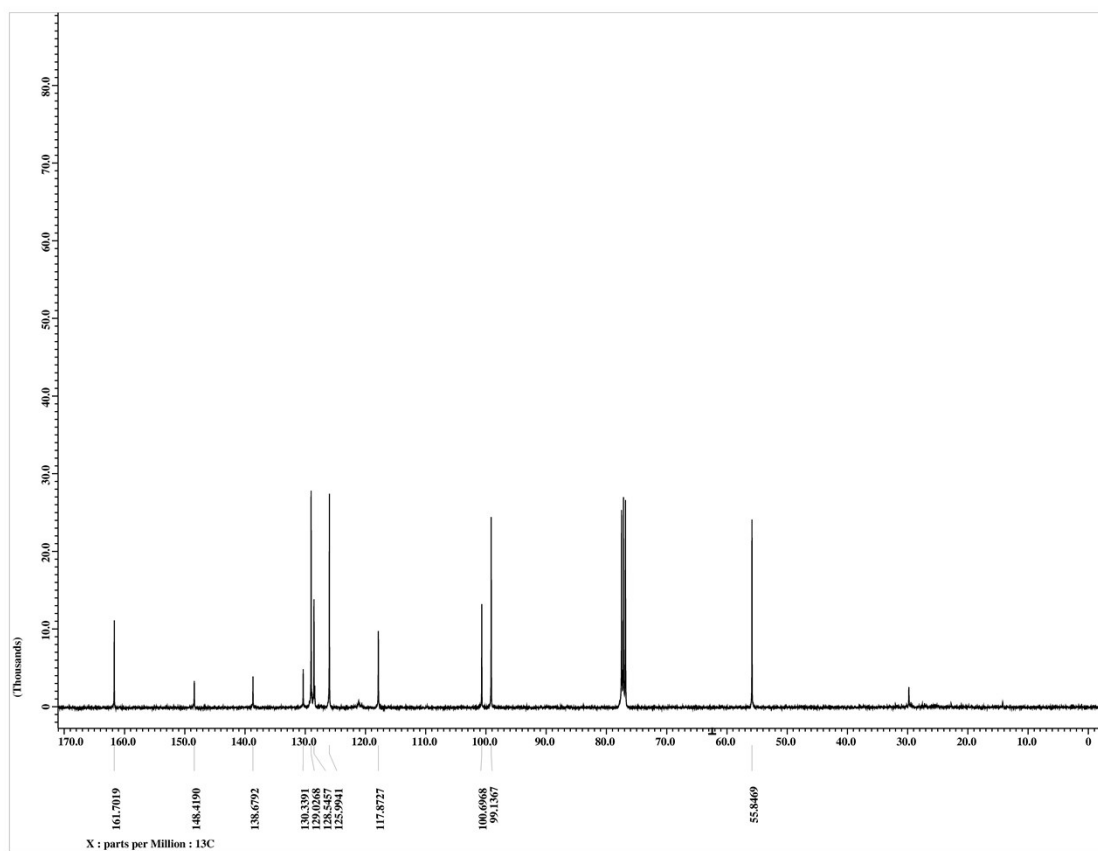

# <sup>1</sup>H and <sup>13</sup>C NMR of 3j:

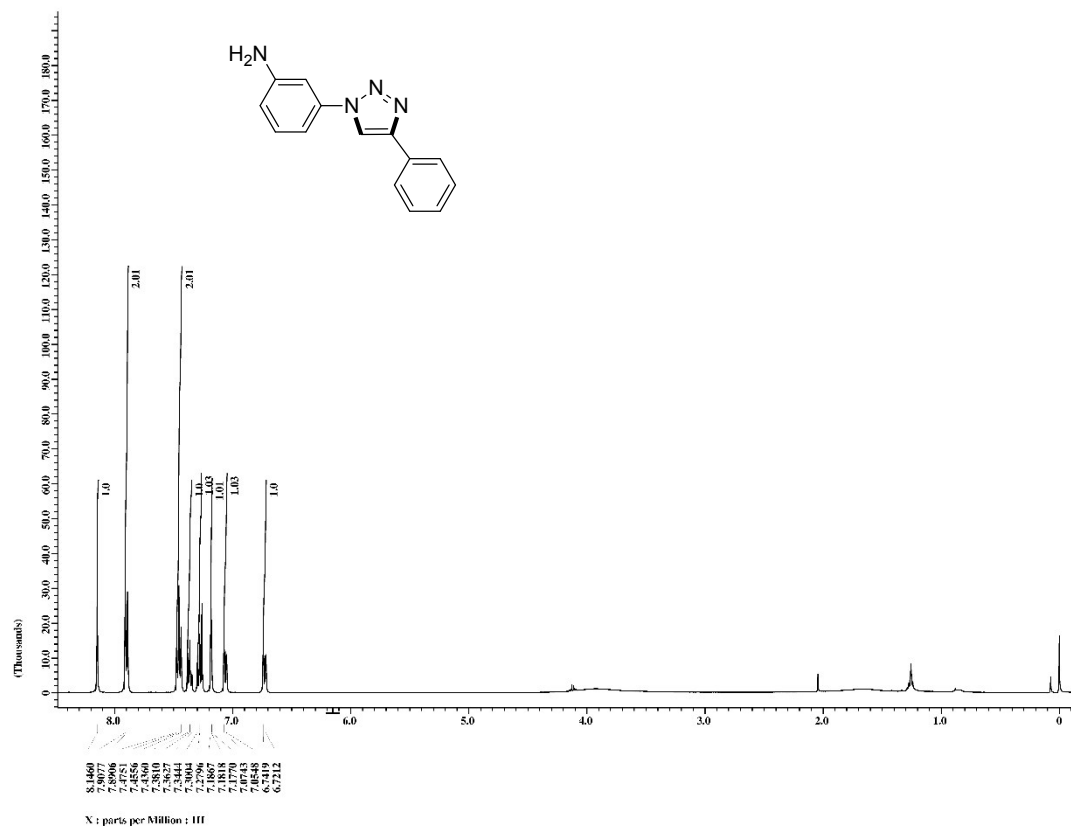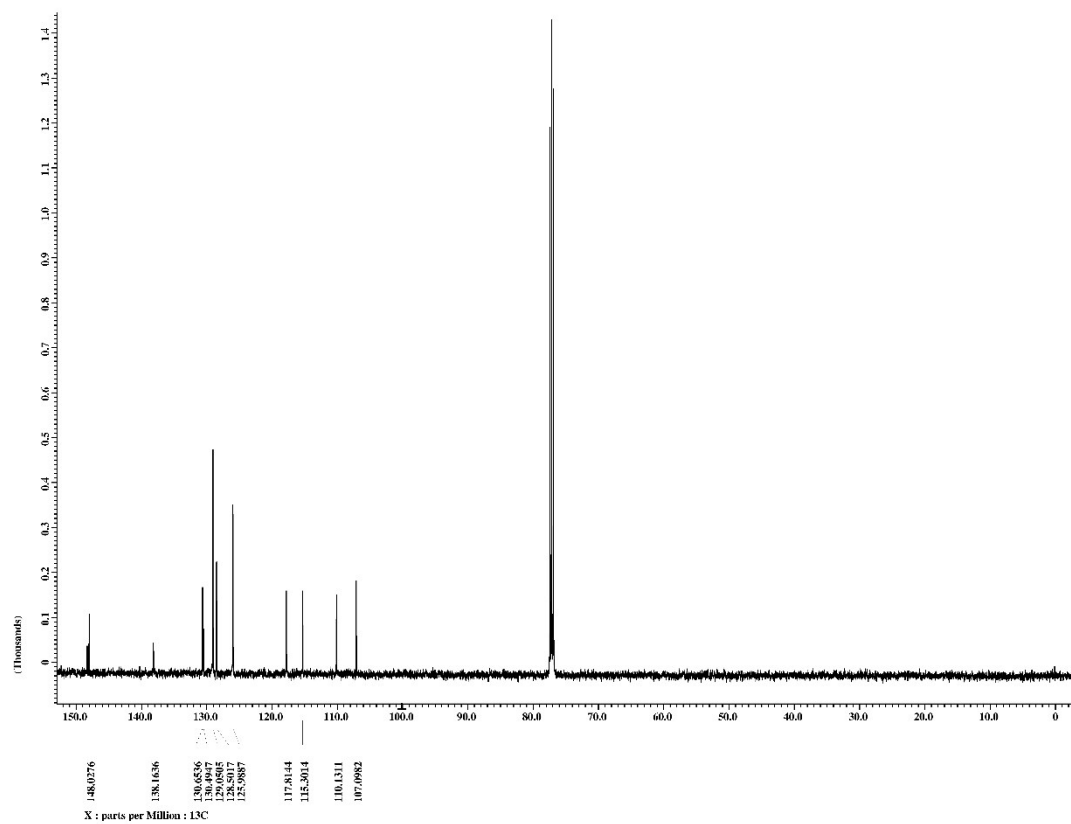

# <sup>1</sup>H and <sup>13</sup>C NMR of 3k:

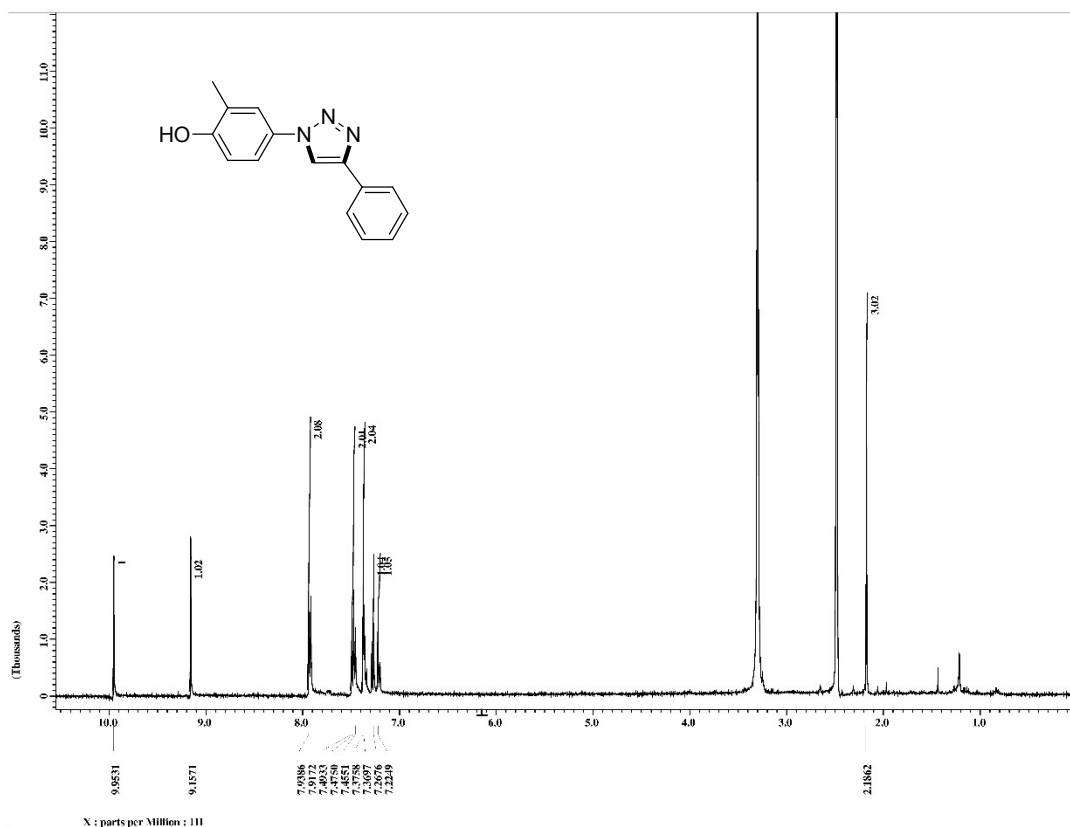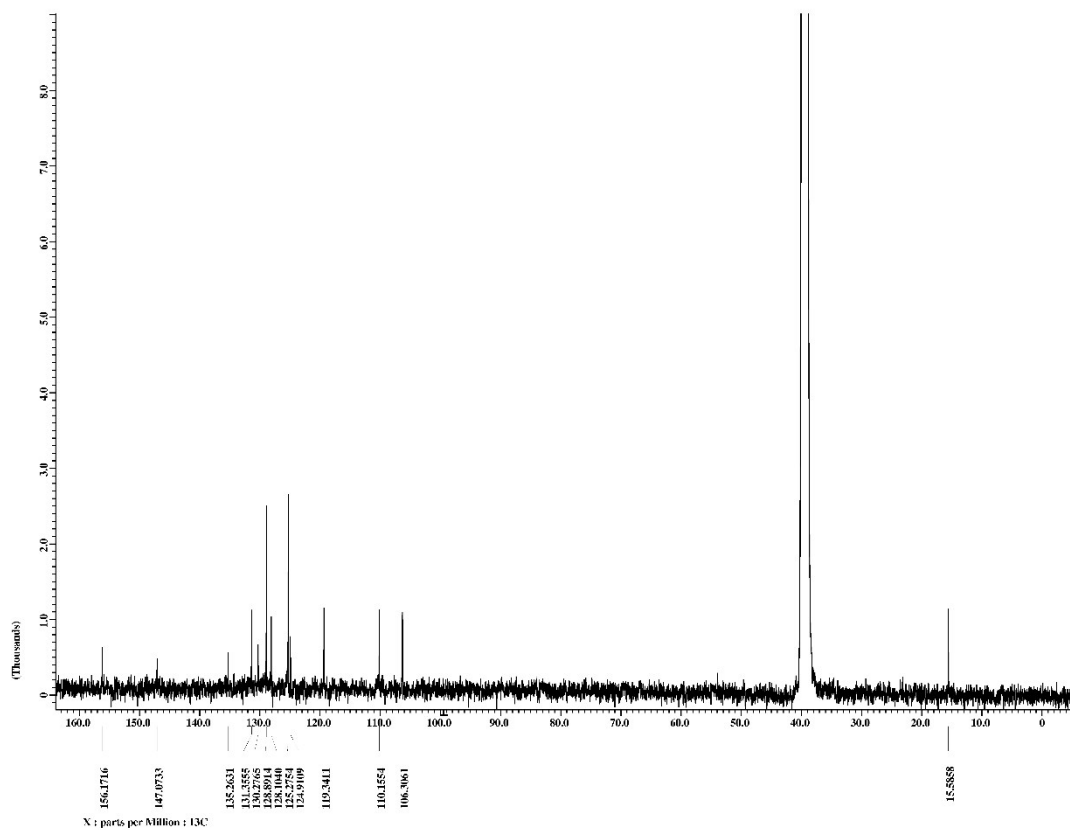

# $^1\text{H}$ and $^{13}\text{C}$ NMR of 3l:

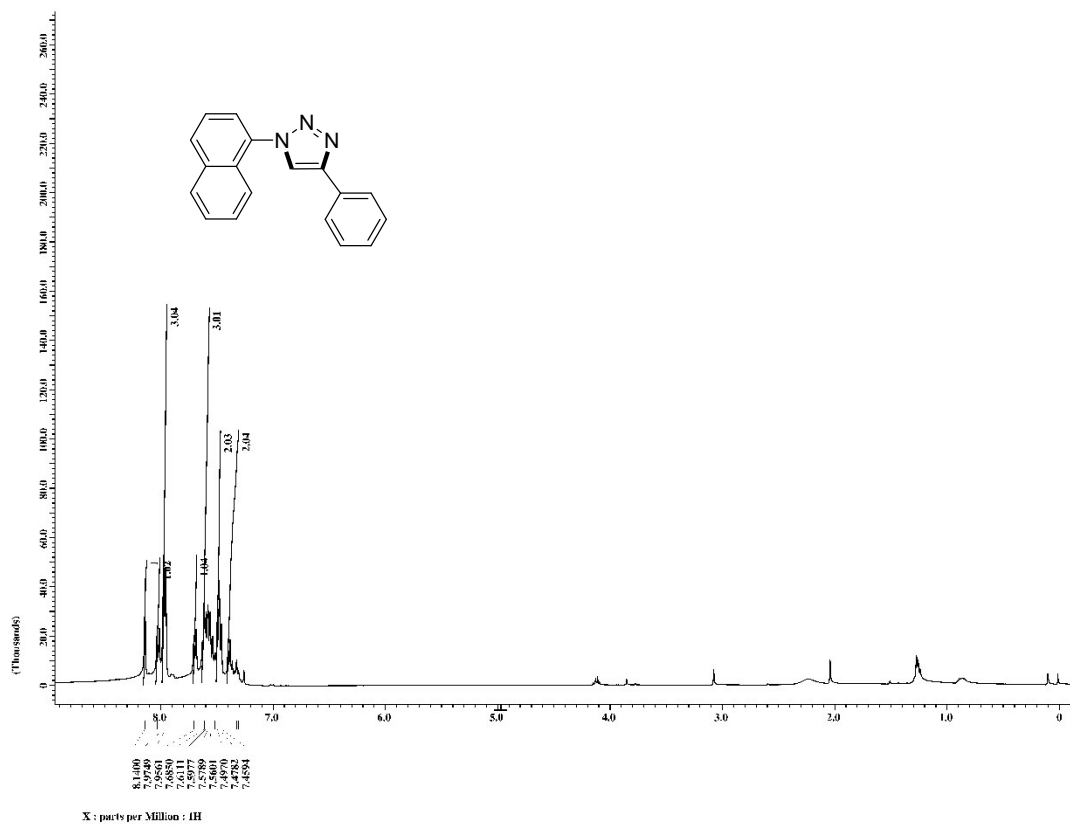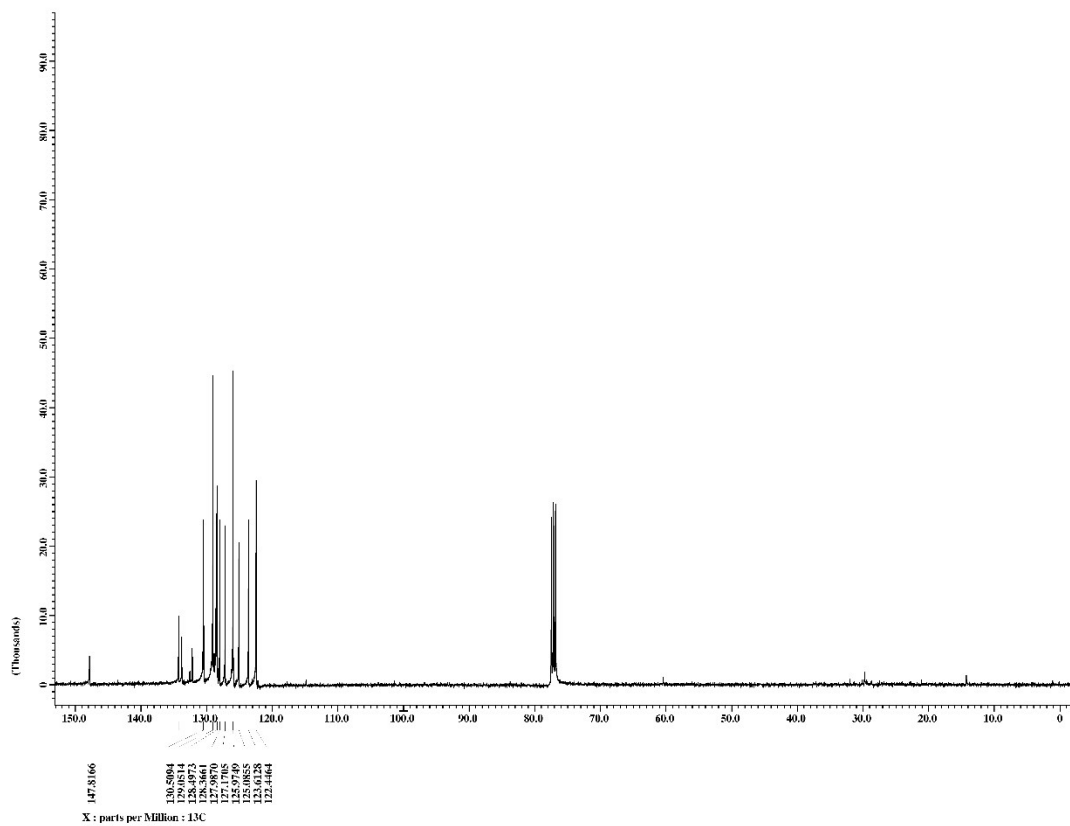

# <sup>1</sup>H and <sup>13</sup>C NMR of 3m:

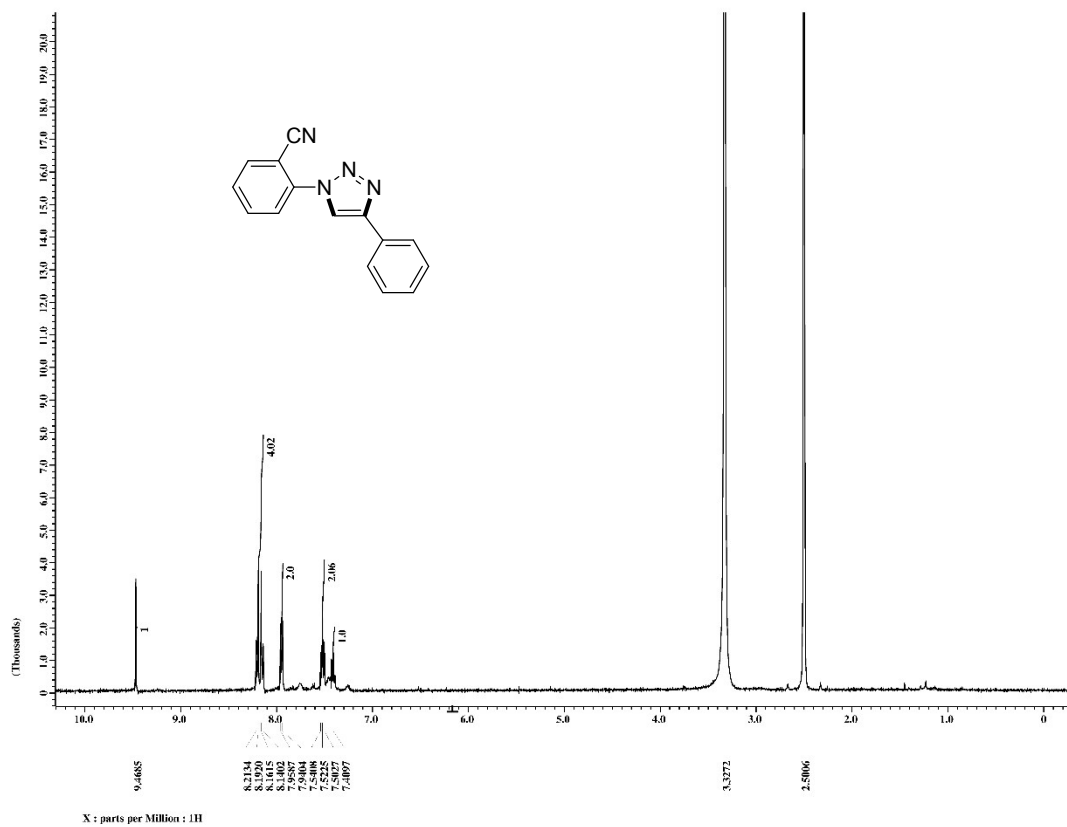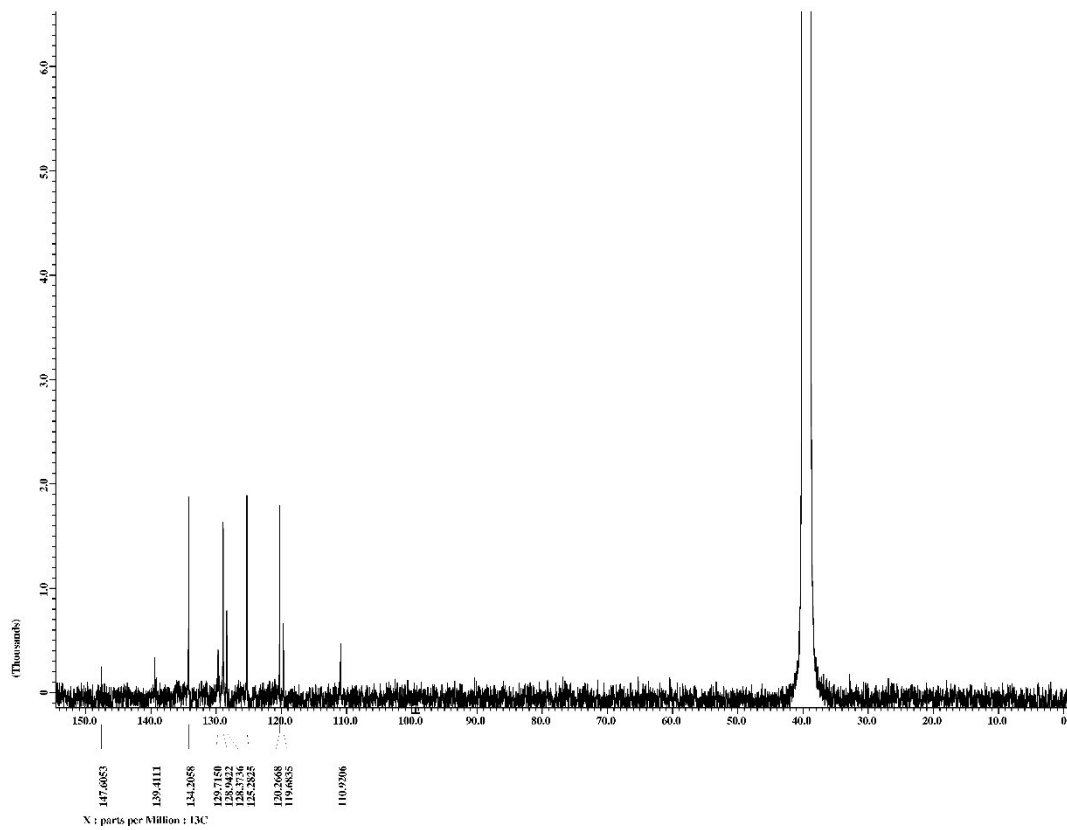



# <sup>1</sup>H and <sup>13</sup>C NMR of 3n:

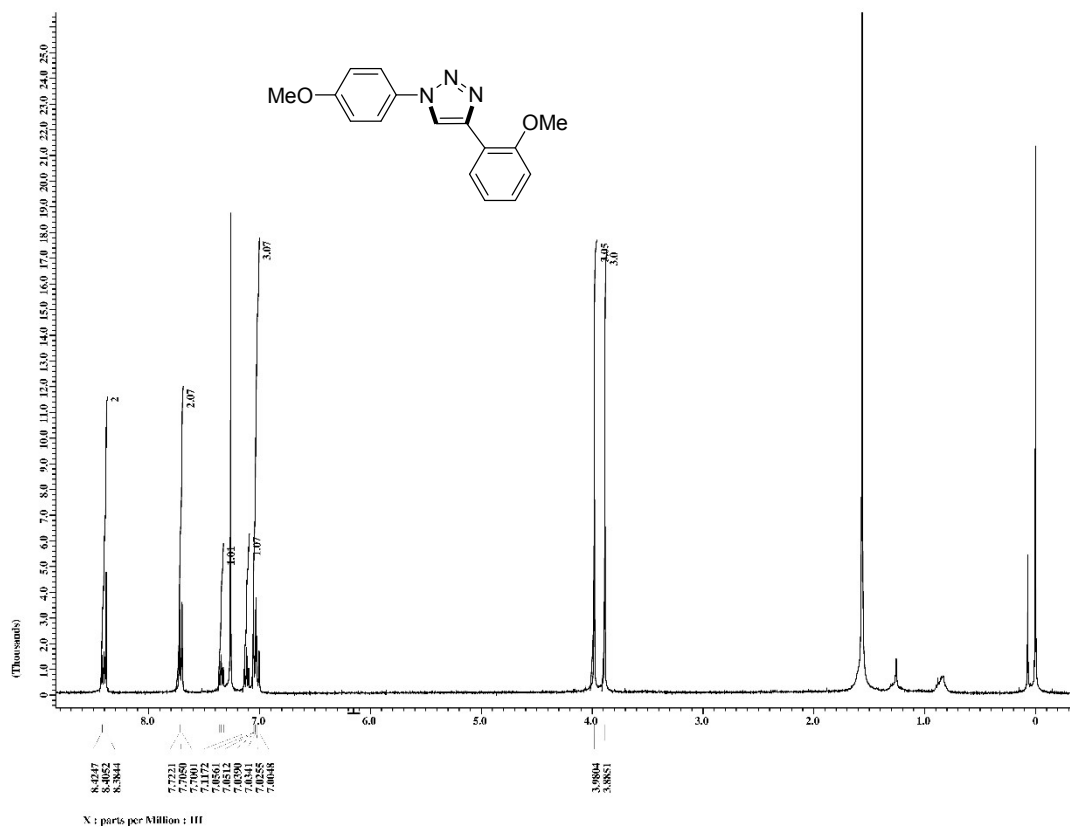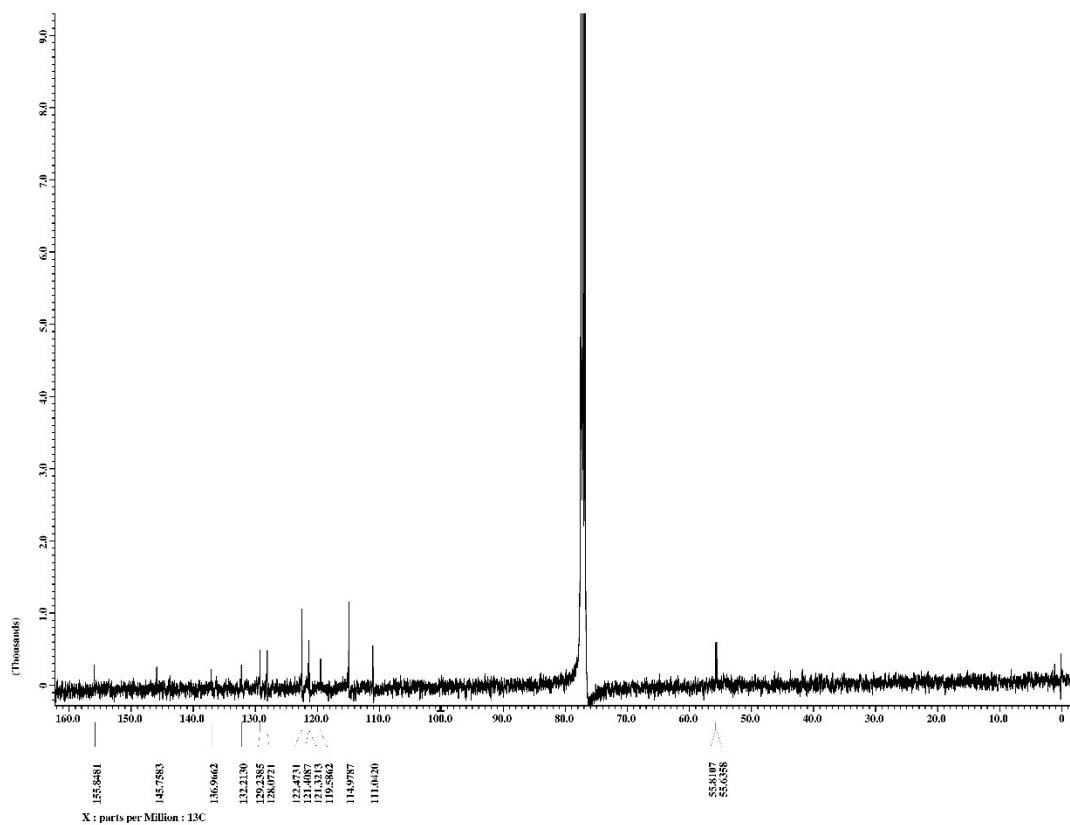

# <sup>1</sup>H and <sup>13</sup>C NMR of 3o:

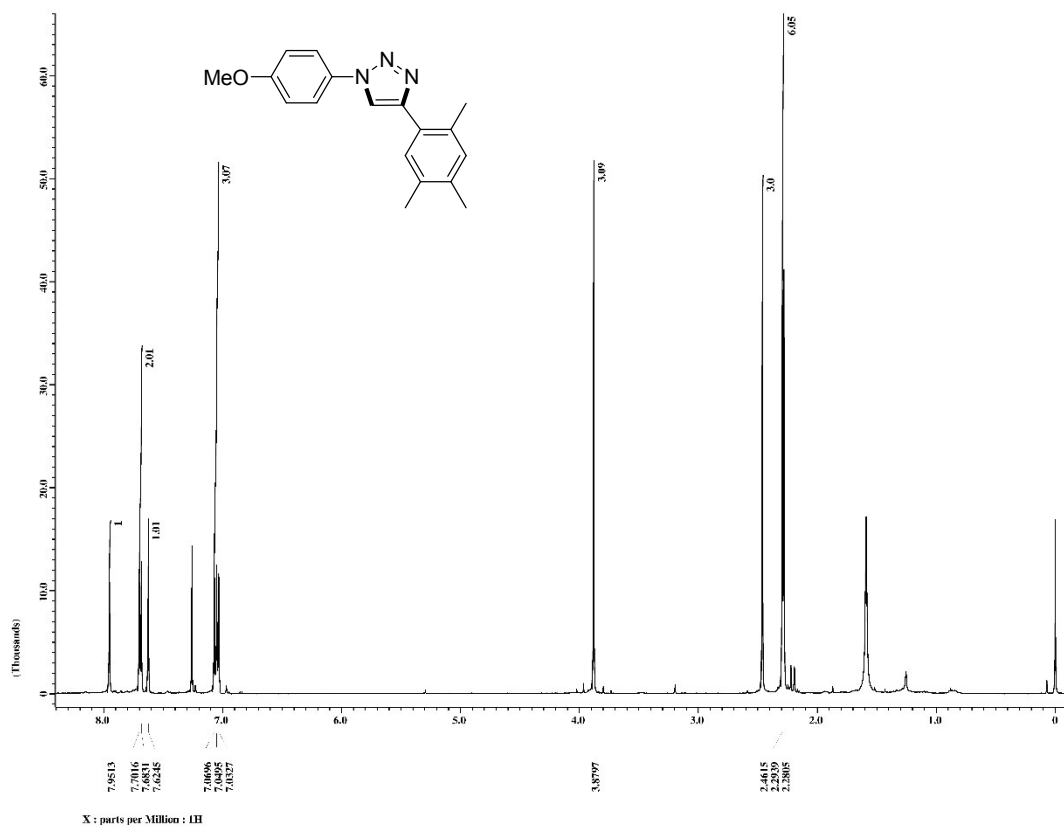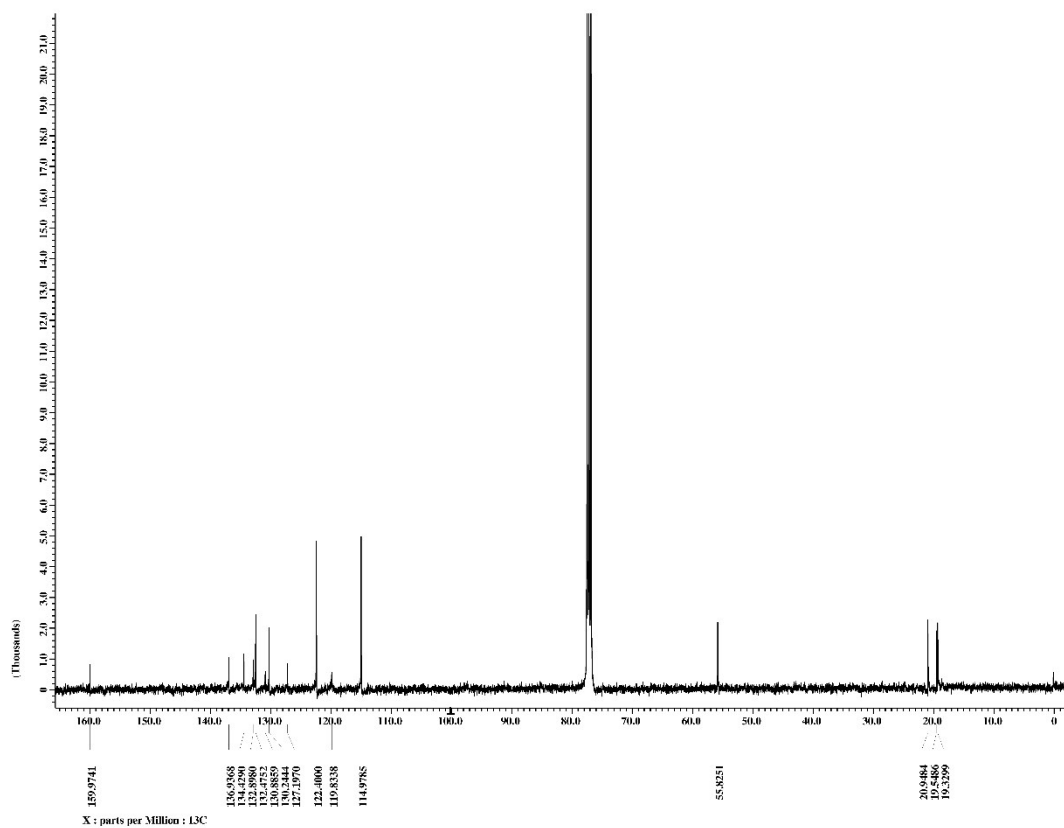

# <sup>1</sup>H and <sup>13</sup>C NMR of 3p:

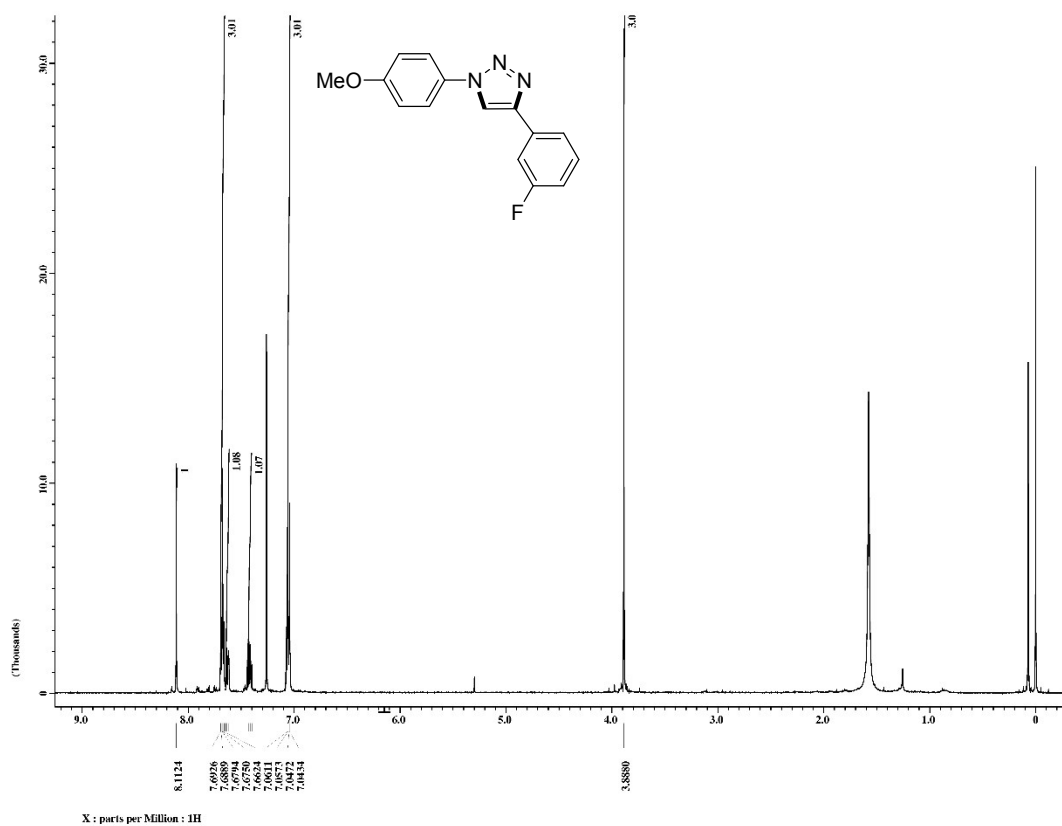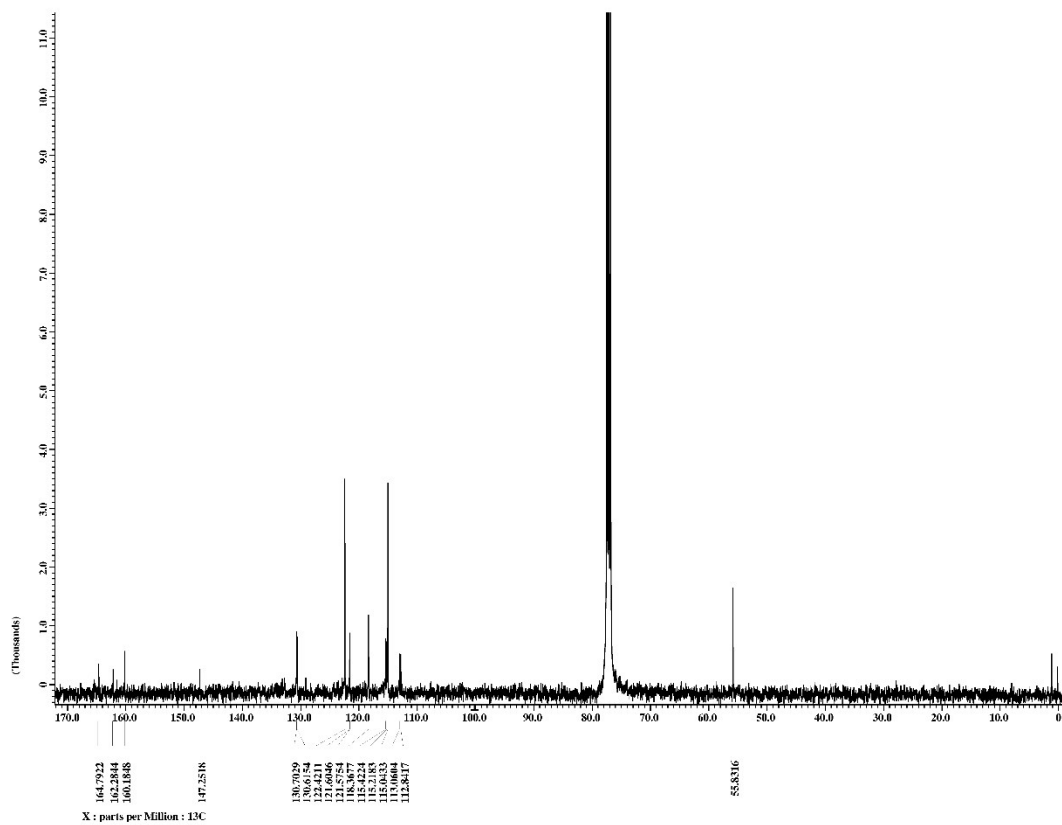

# $^1\text{H}$ and $^{13}\text{C}$ NMR of 3q:

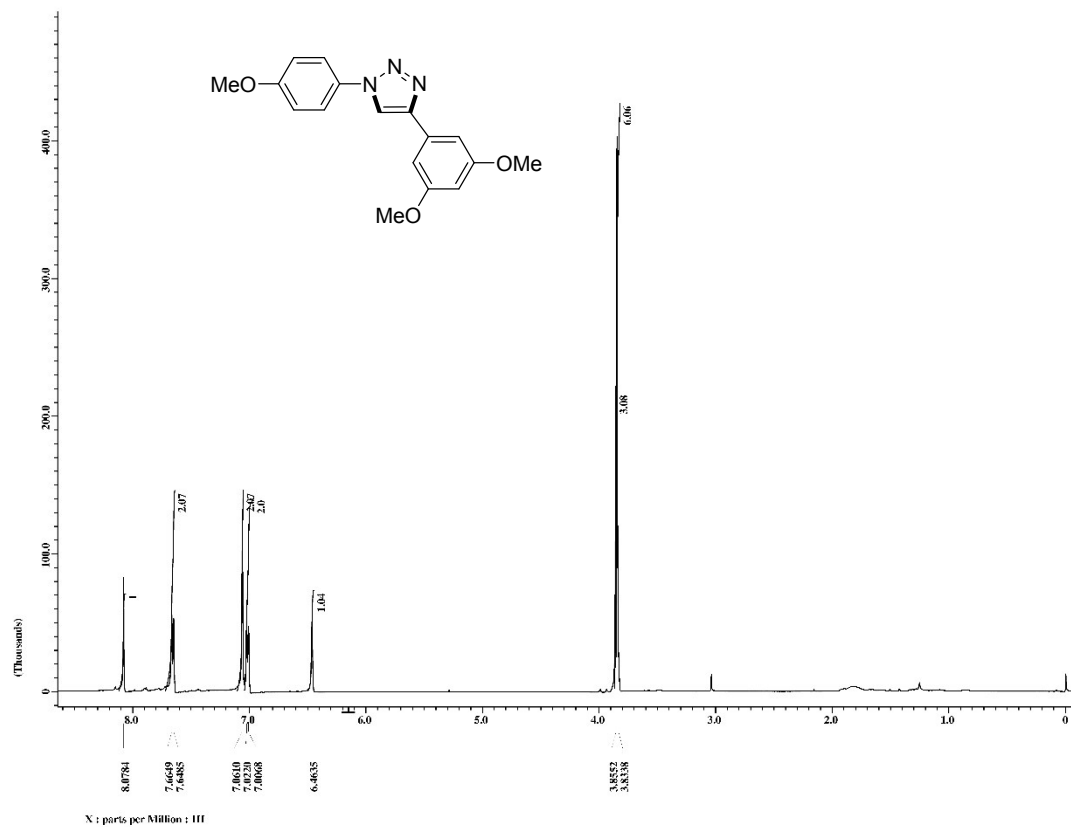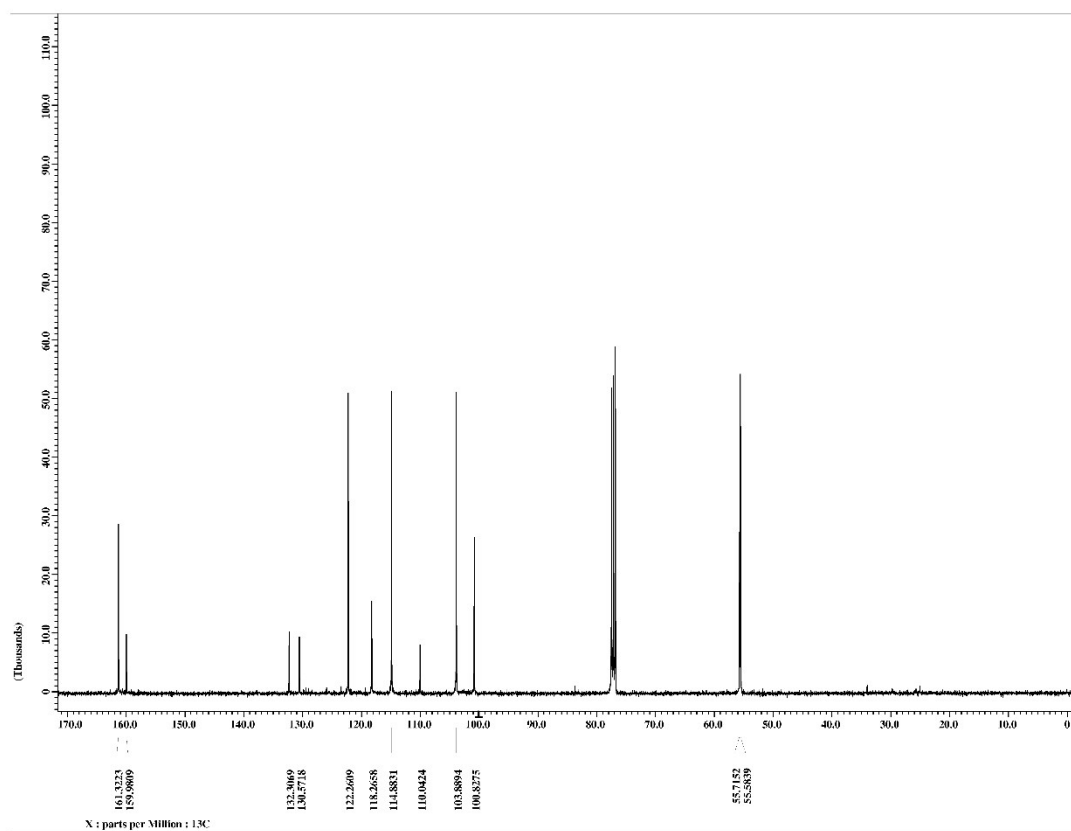

# <sup>1</sup>H and <sup>13</sup>C NMR of 3r:

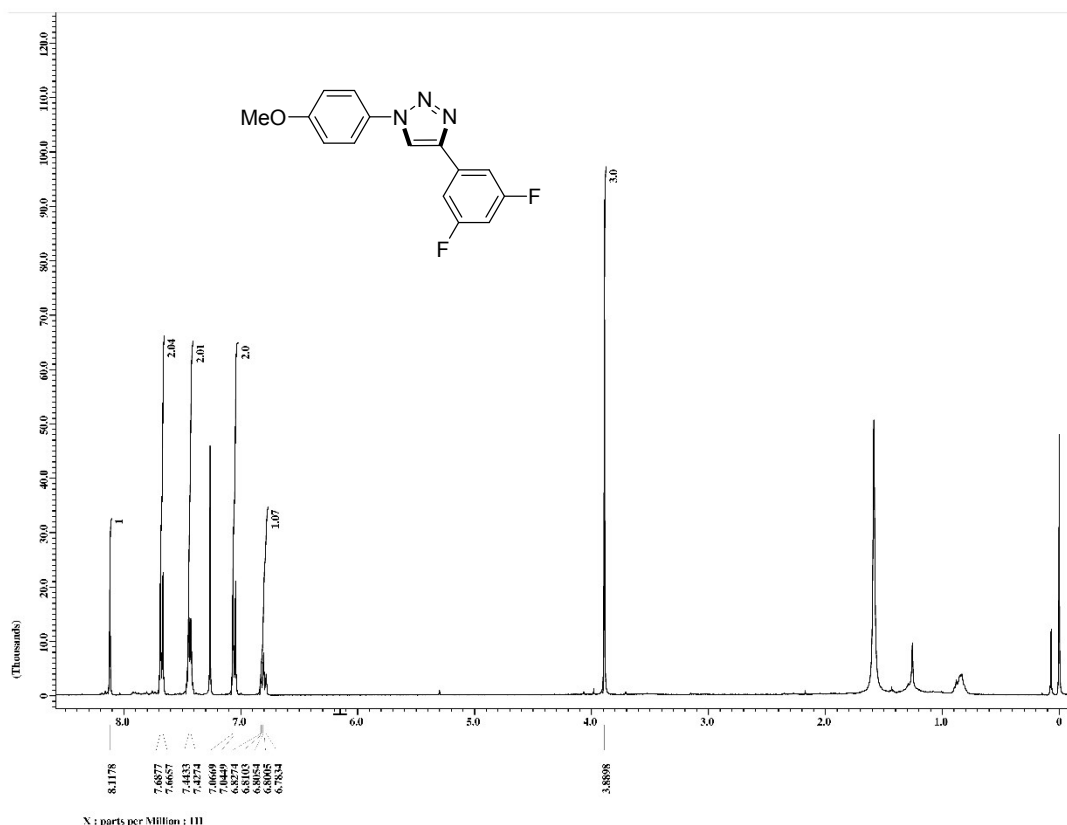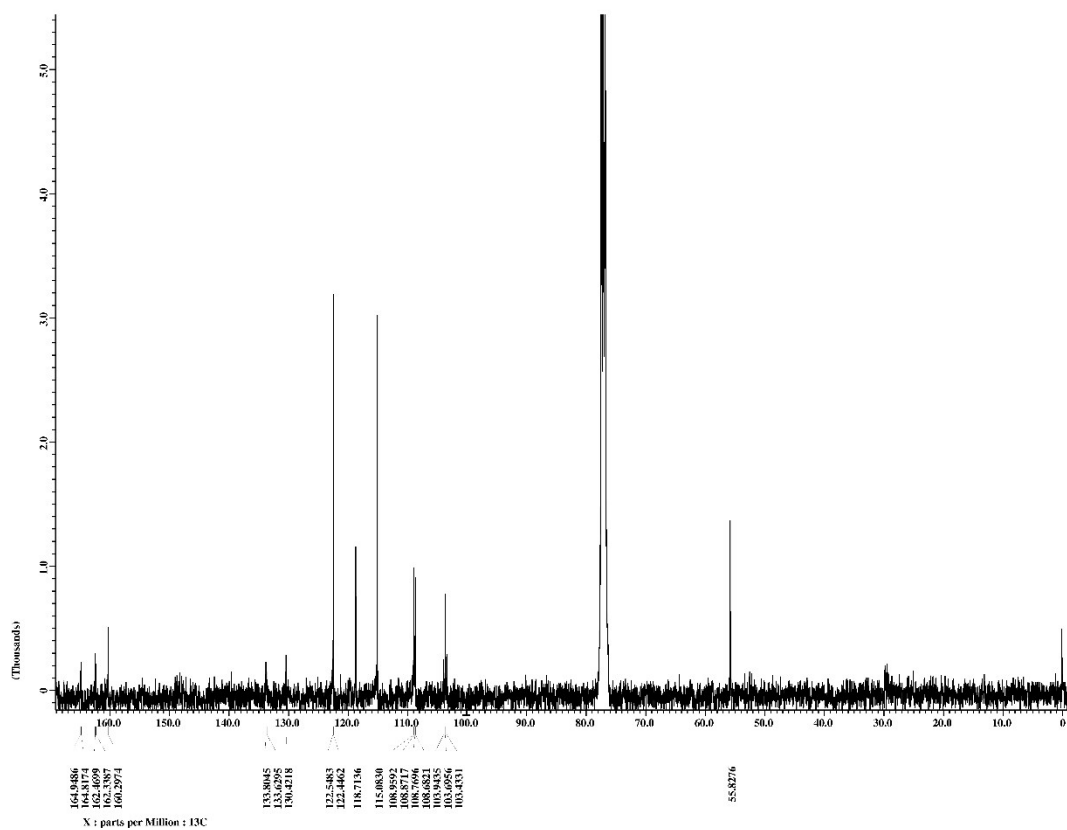

# <sup>1</sup>H and <sup>13</sup>C NMR of 3s:

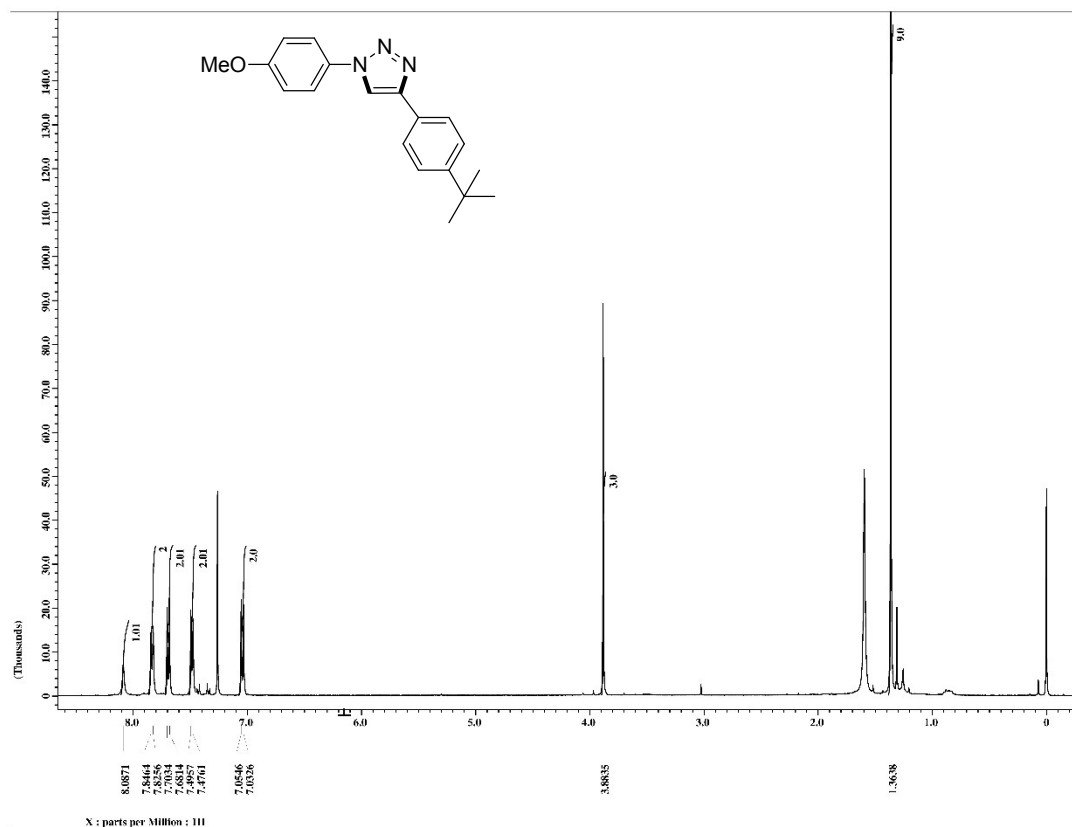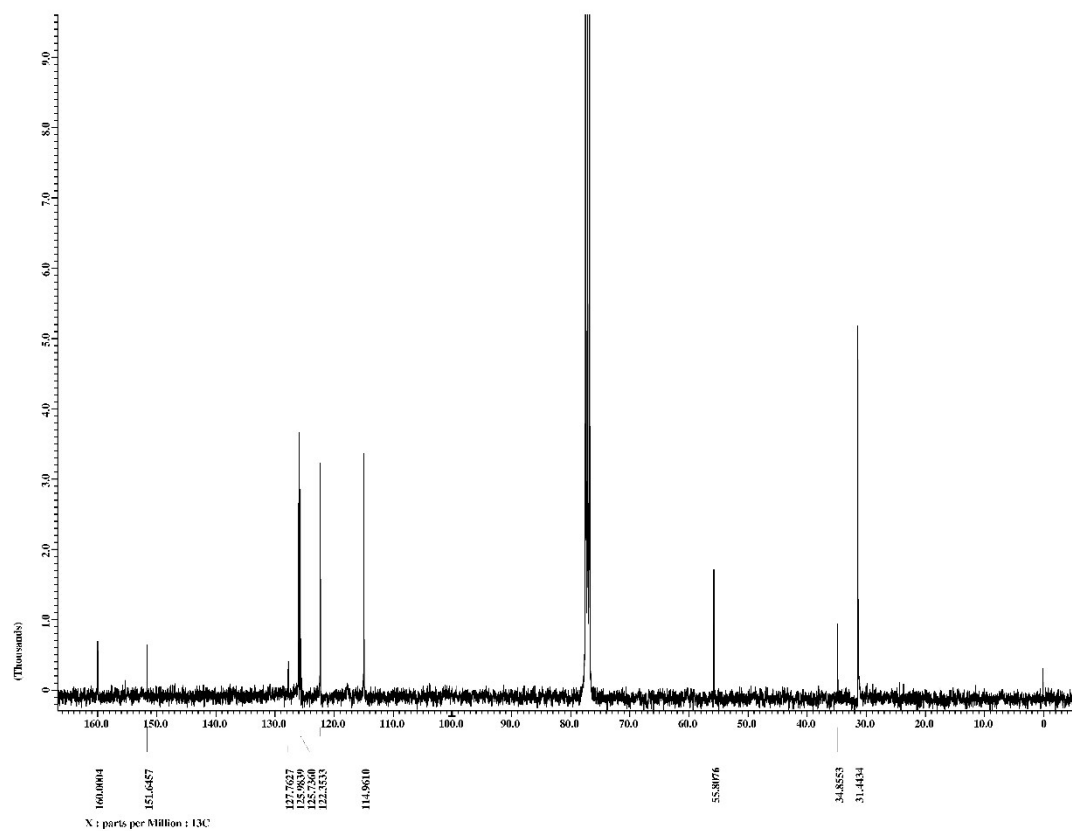

# <sup>1</sup>H and <sup>13</sup>C NMR of 3t:

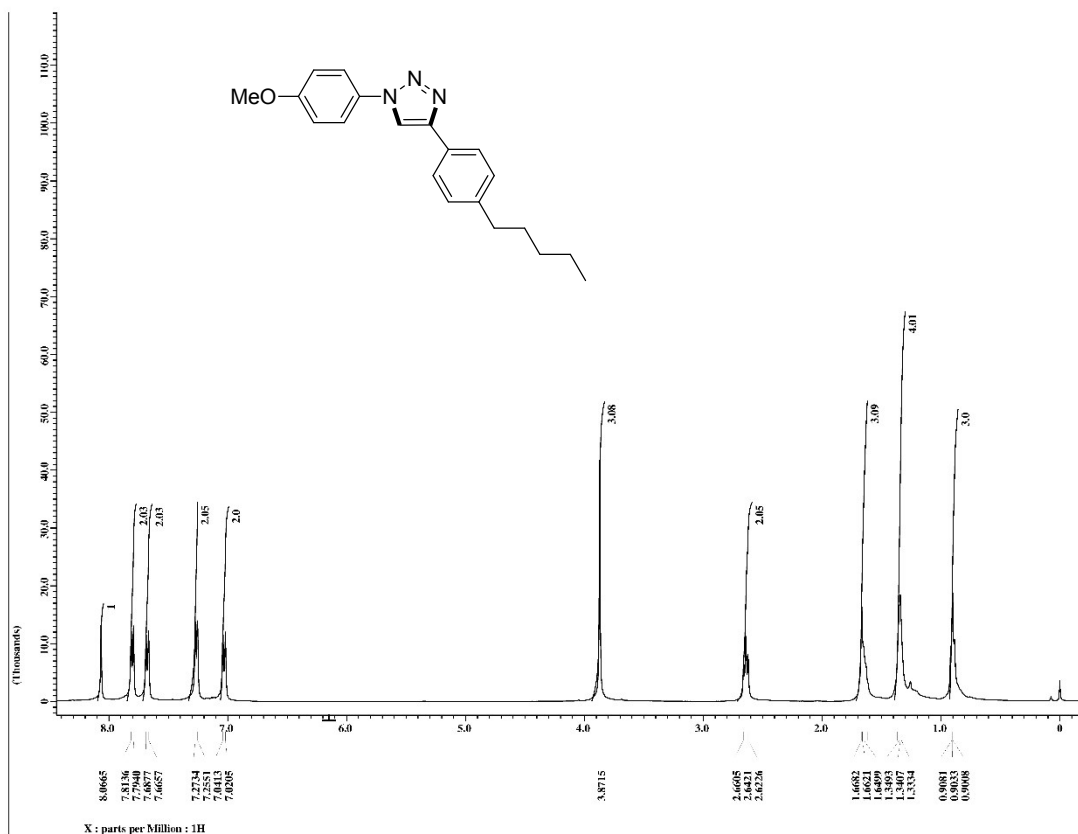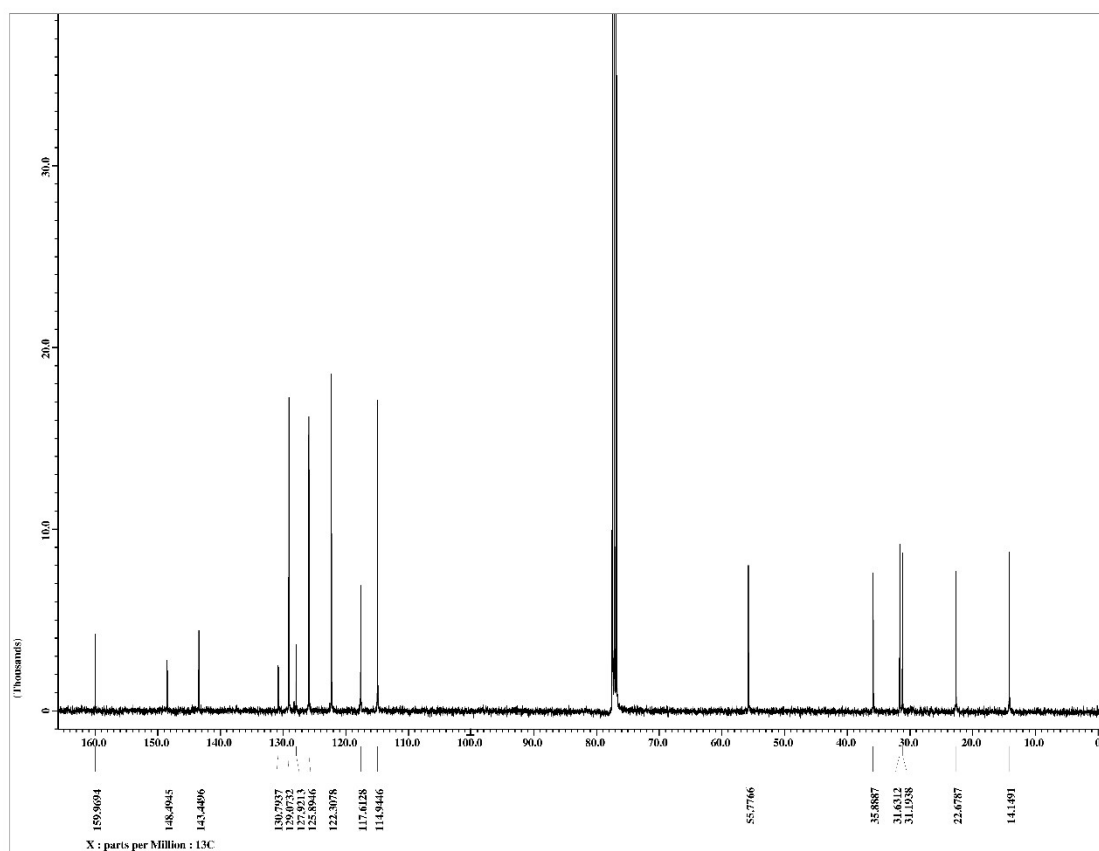

# <sup>1</sup>H and <sup>13</sup>C NMR of 3u:

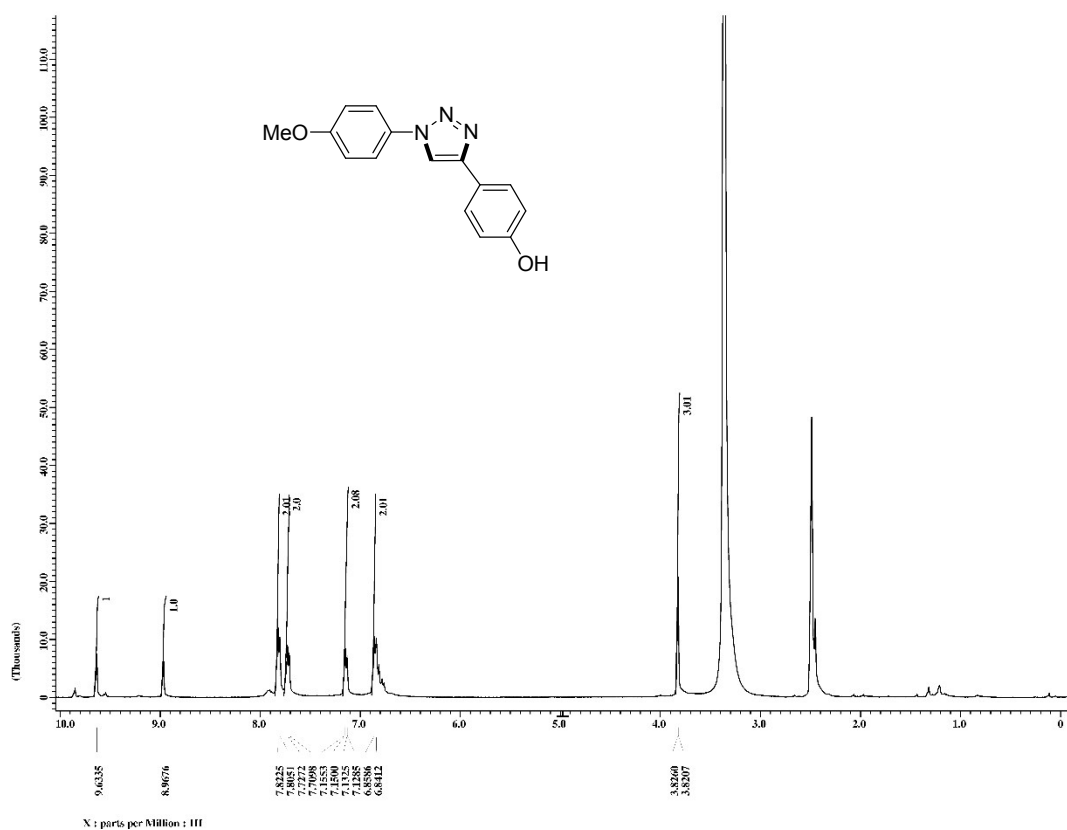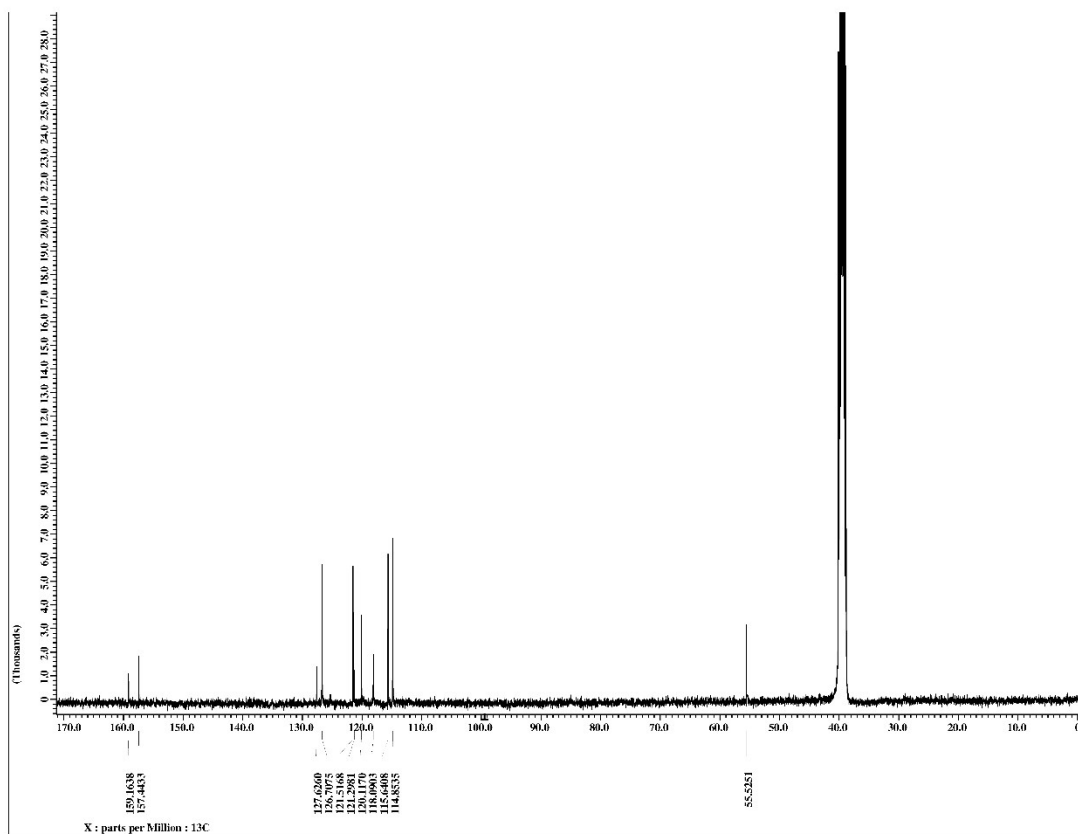



# <sup>1</sup>H and <sup>13</sup>C NMR of 3v:

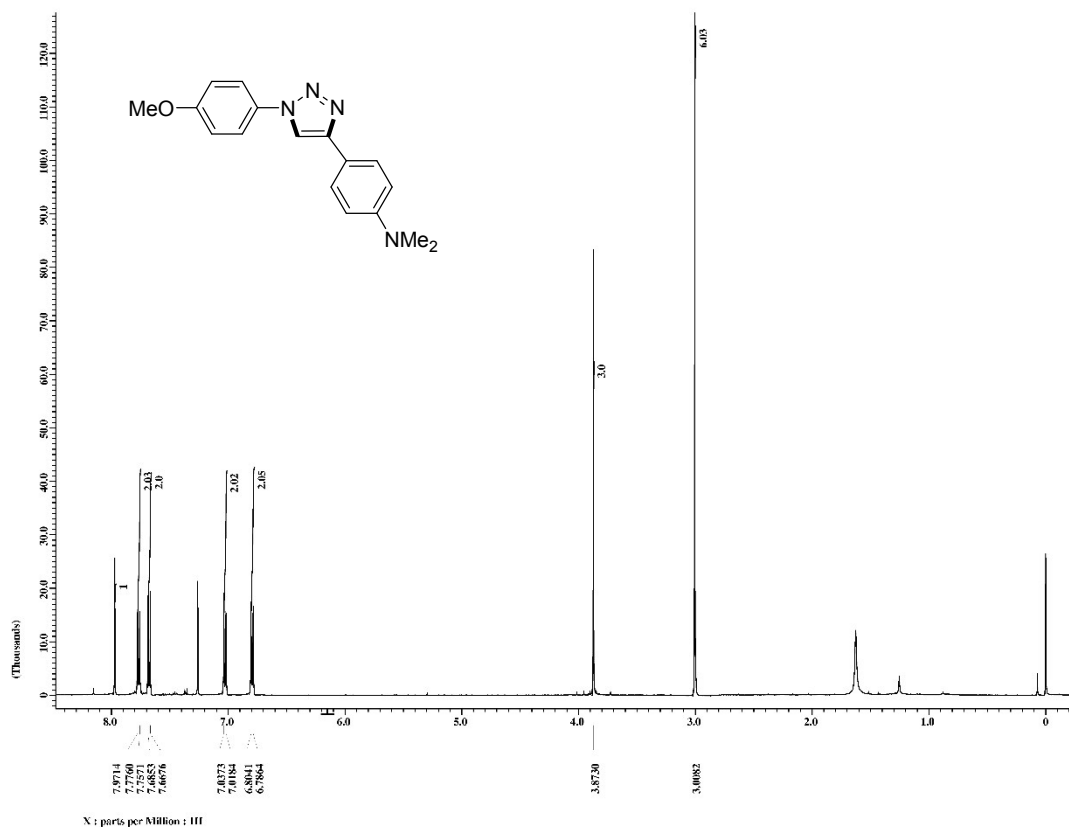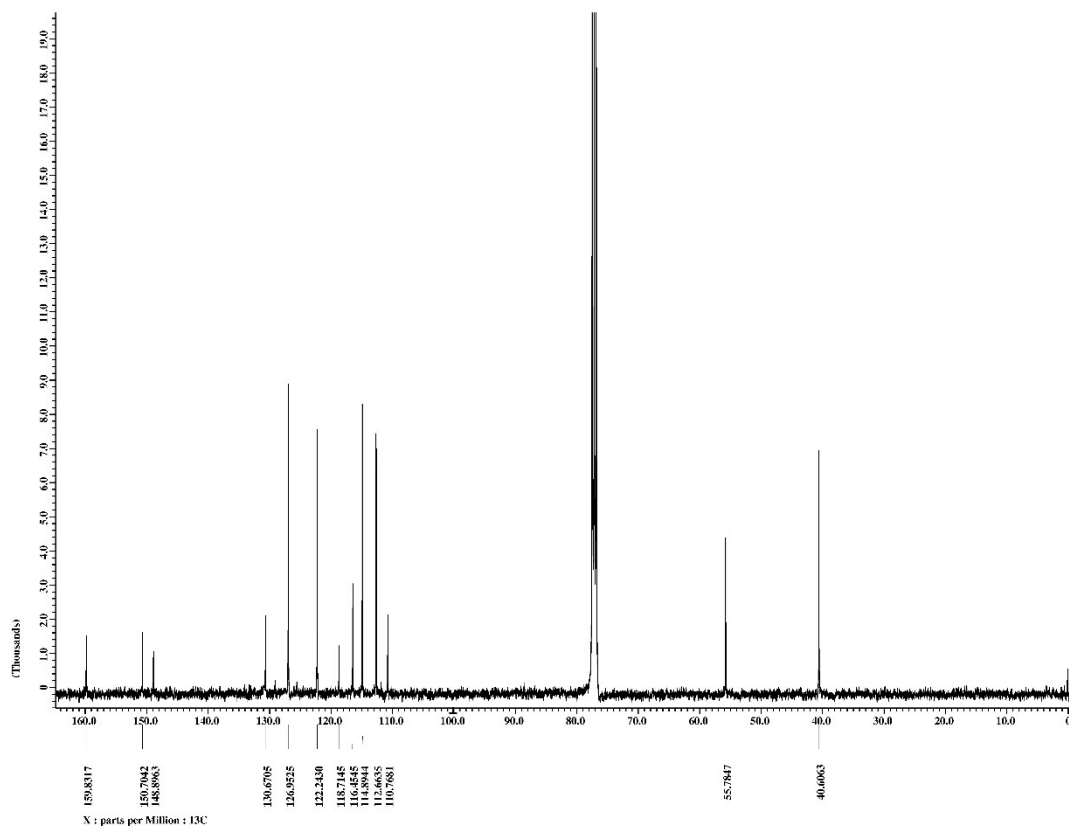

# <sup>1</sup>H and <sup>13</sup>C NMR of 3w:

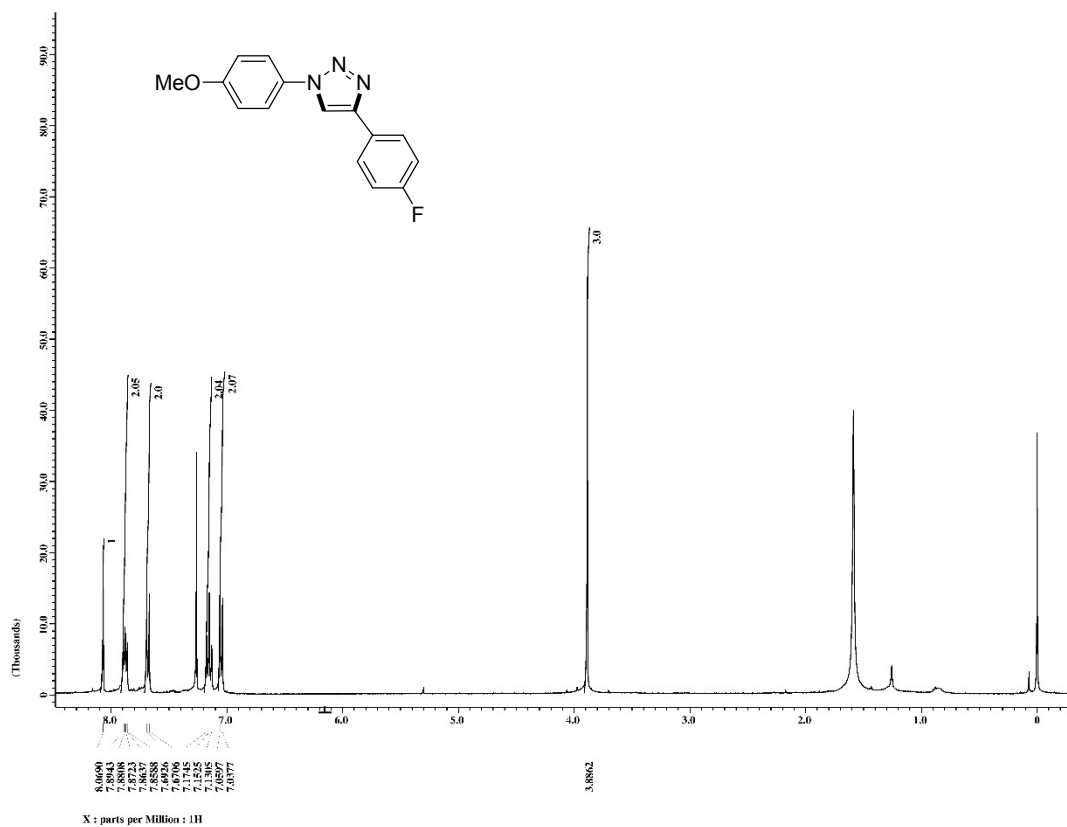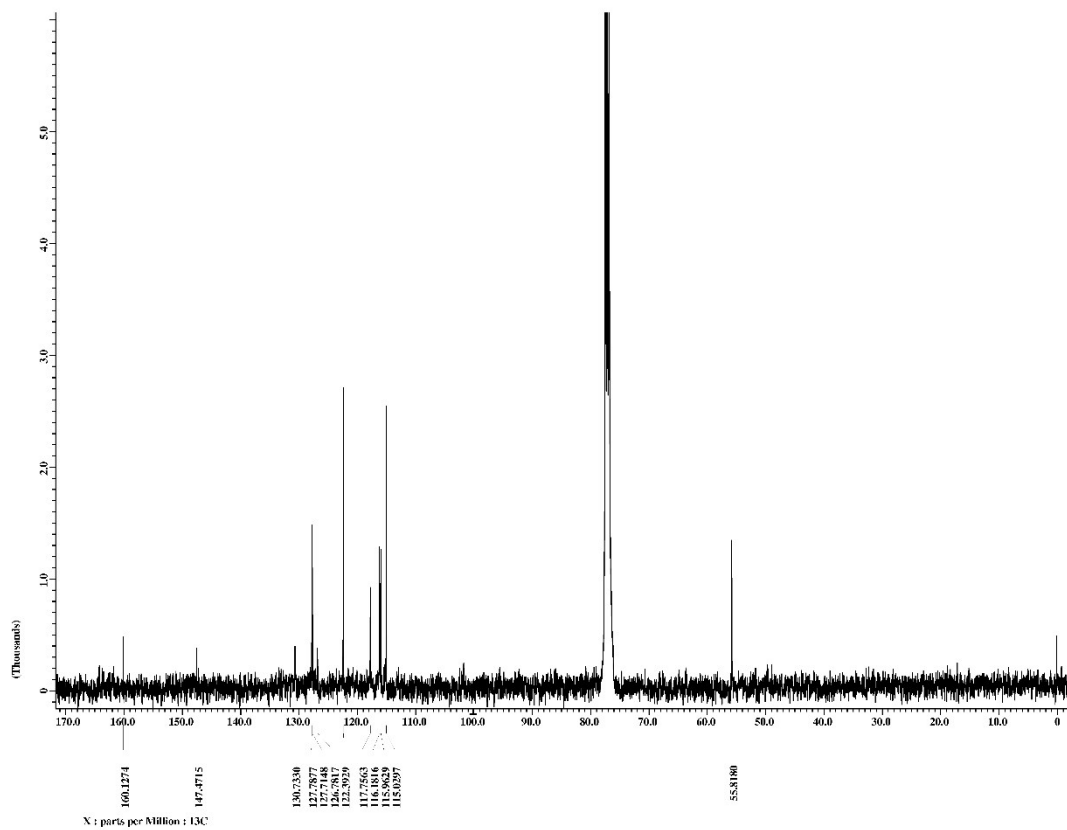

# <sup>1</sup>H and <sup>13</sup>C NMR of 3x:

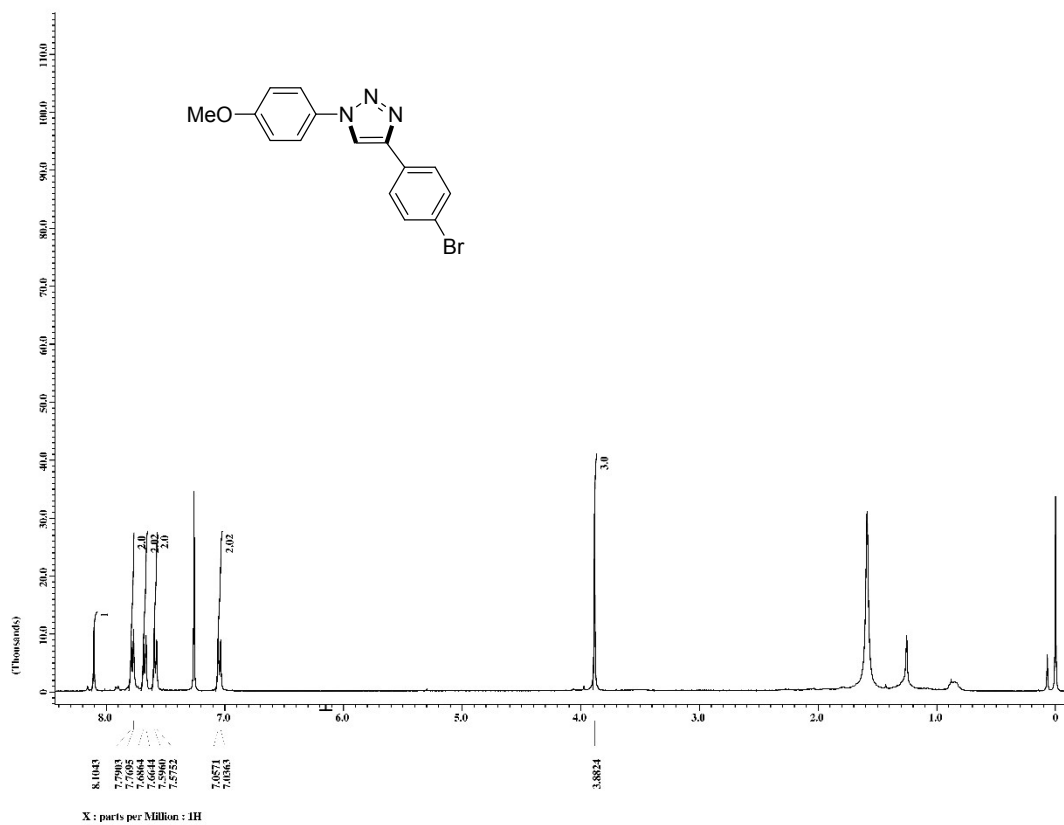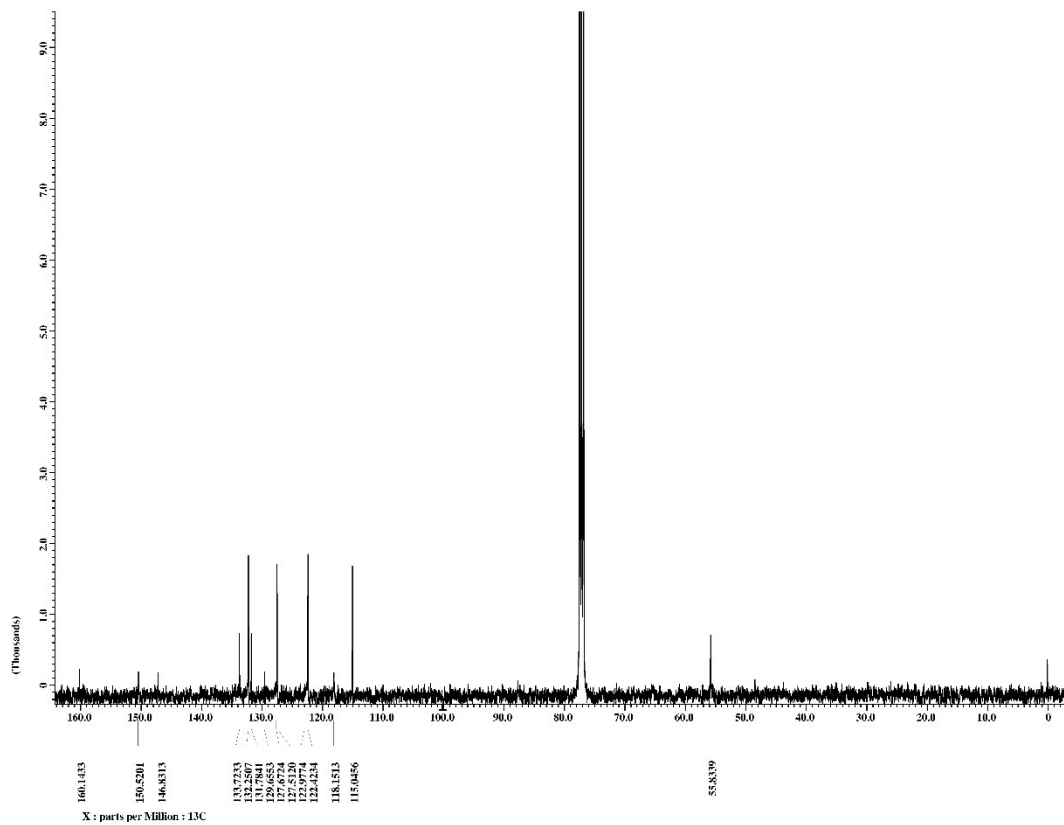

# <sup>1</sup>H and <sup>13</sup>C NMR of 3y:

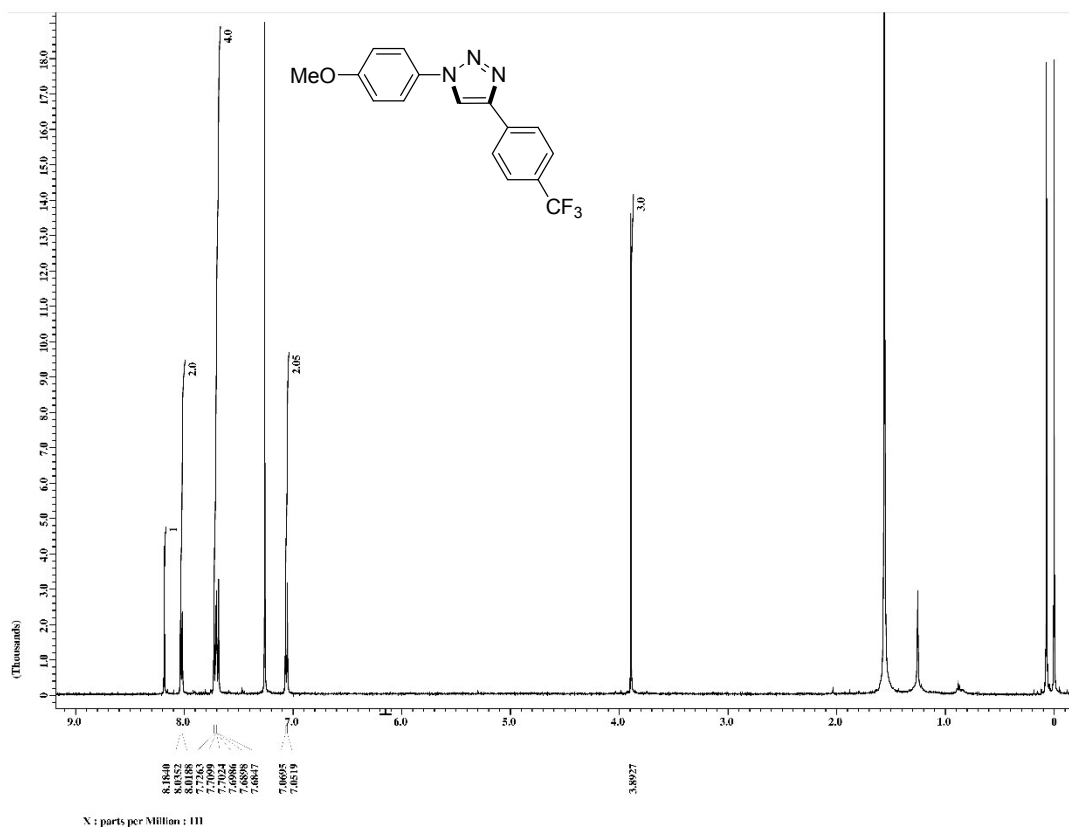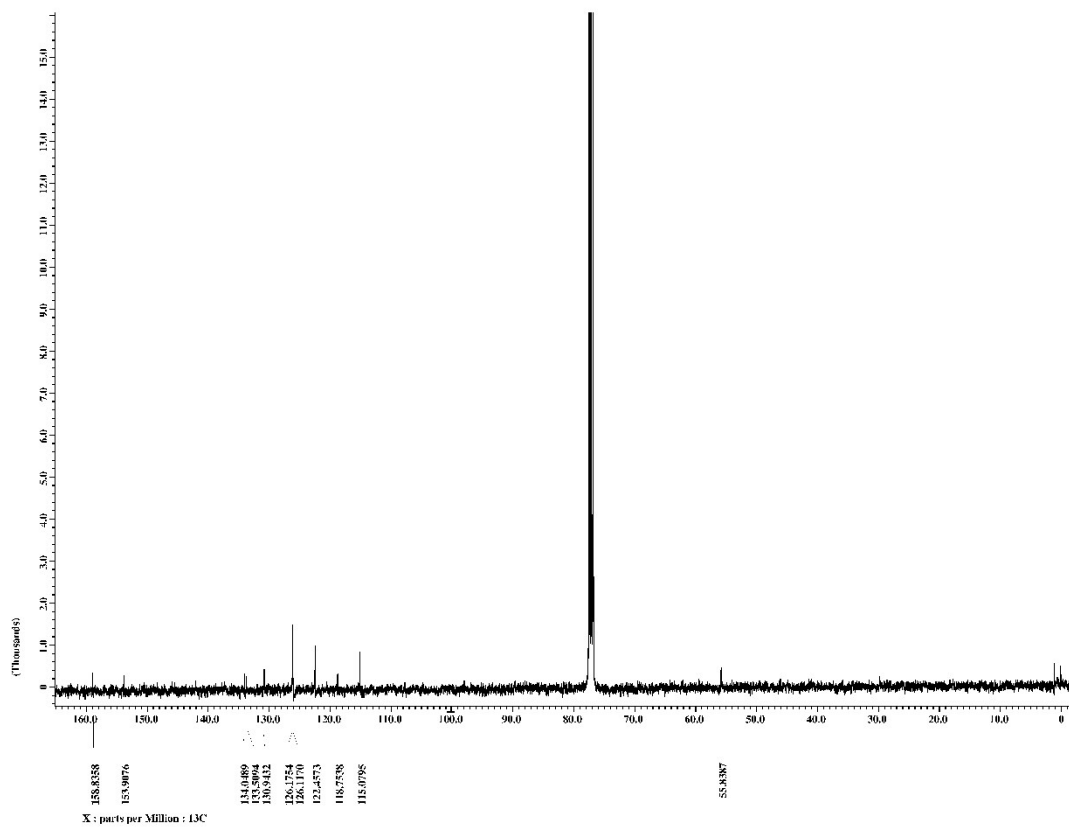

# <sup>1</sup>H and <sup>13</sup>C NMR of 3z:

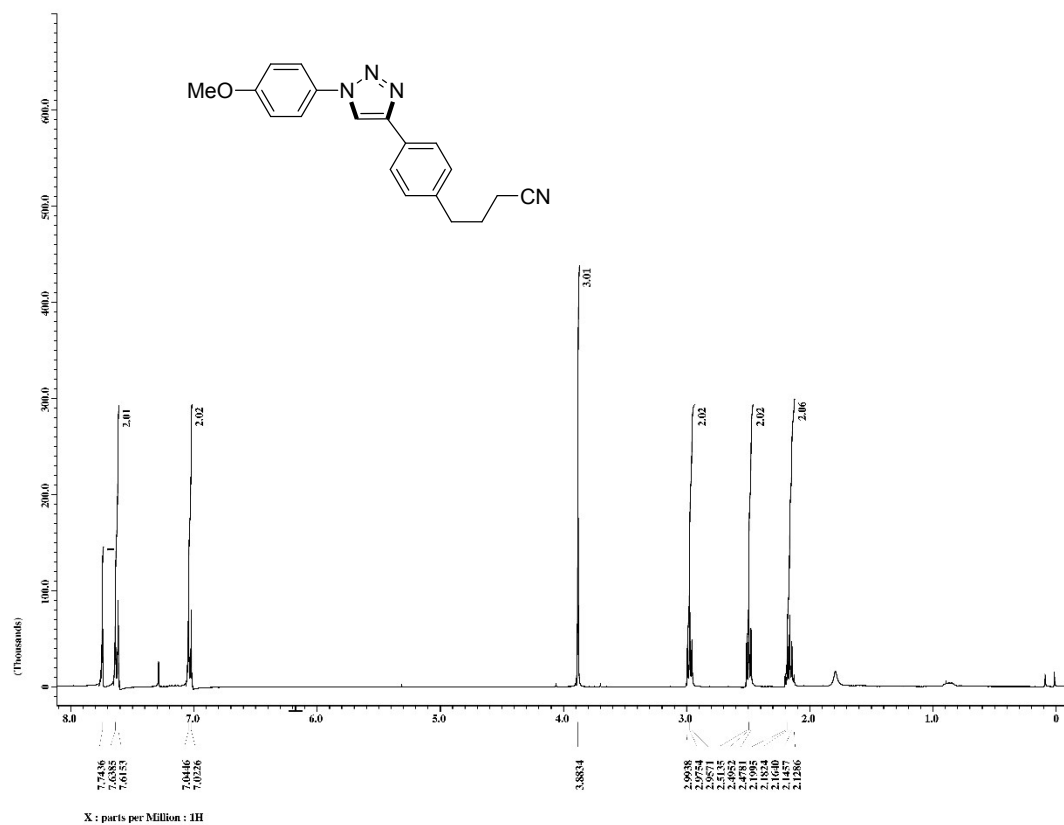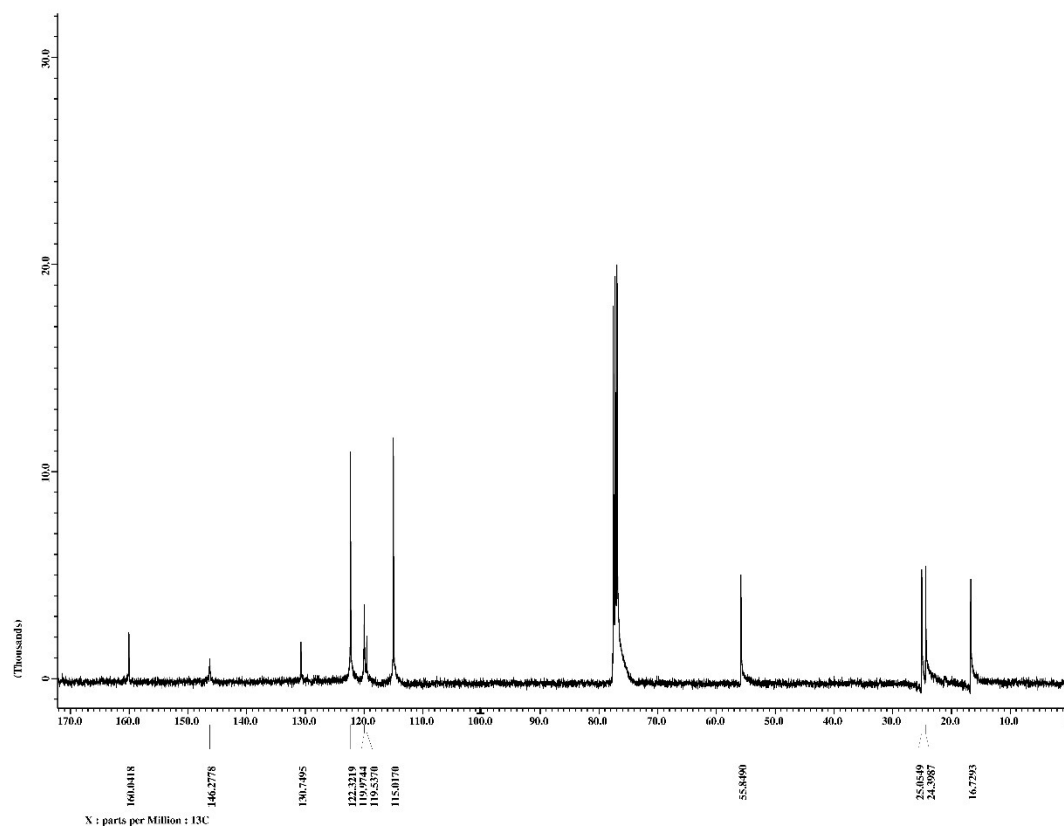

# <sup>1</sup>H and <sup>13</sup>C NMR of 6a:

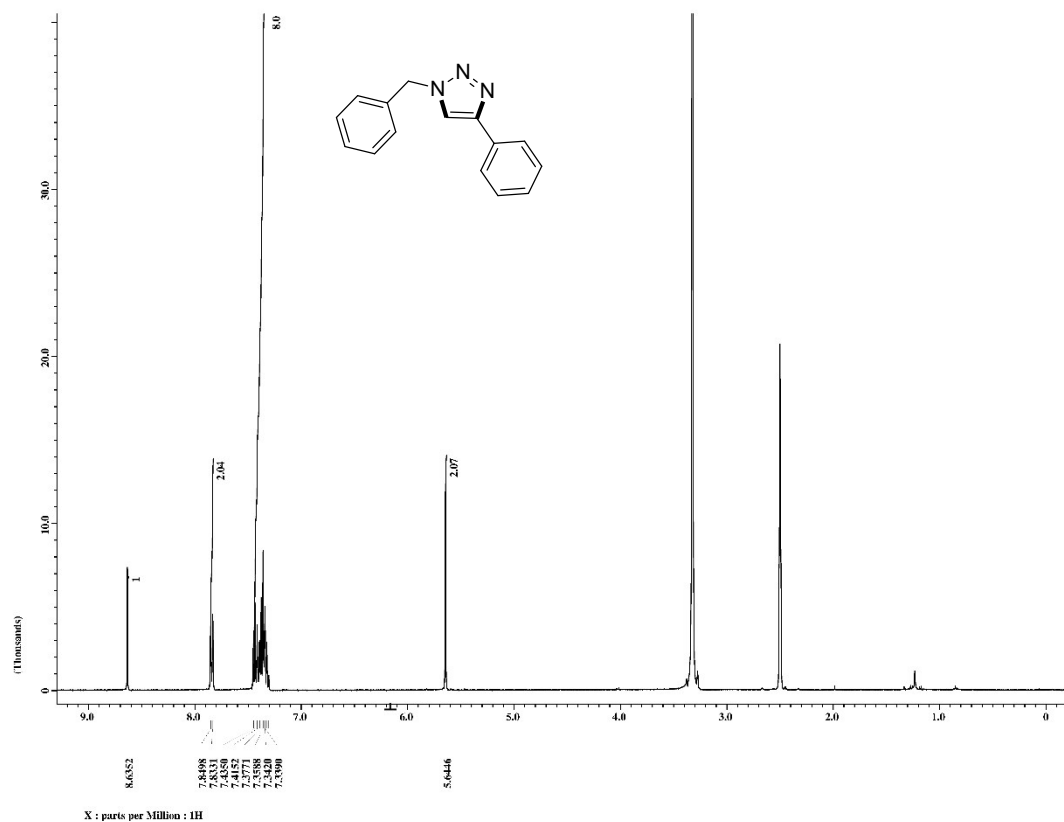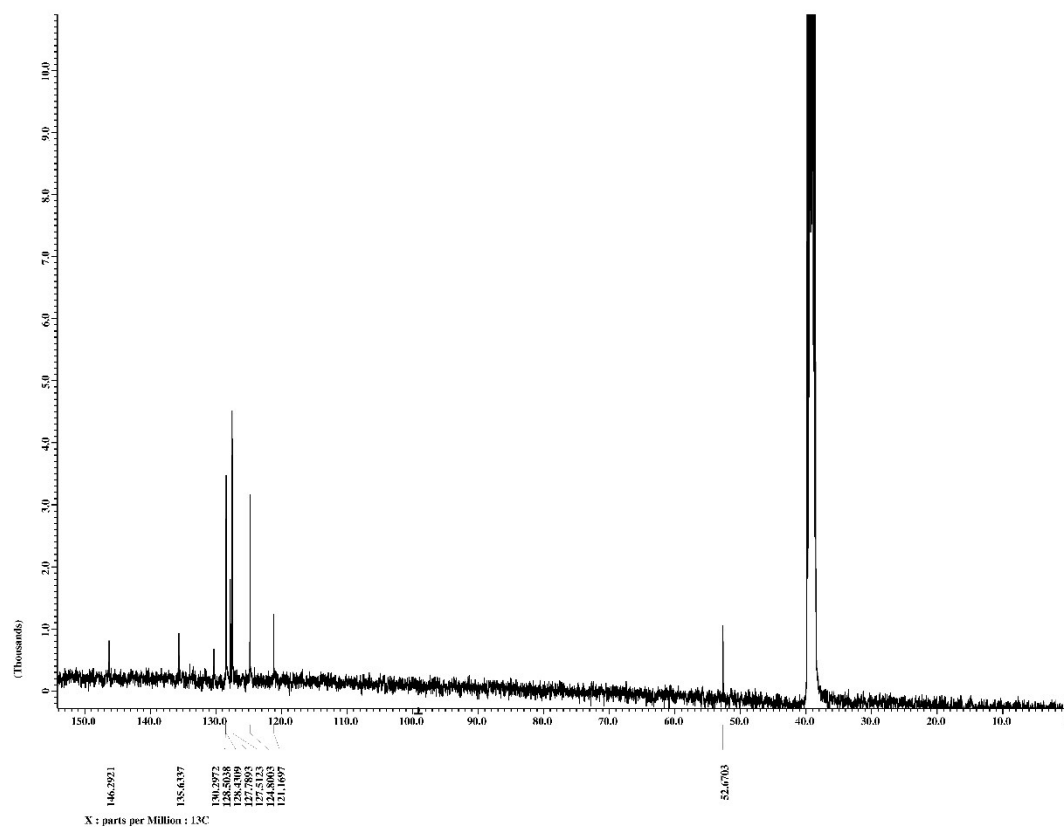

# <sup>1</sup>H and <sup>13</sup>C NMR of 6b:

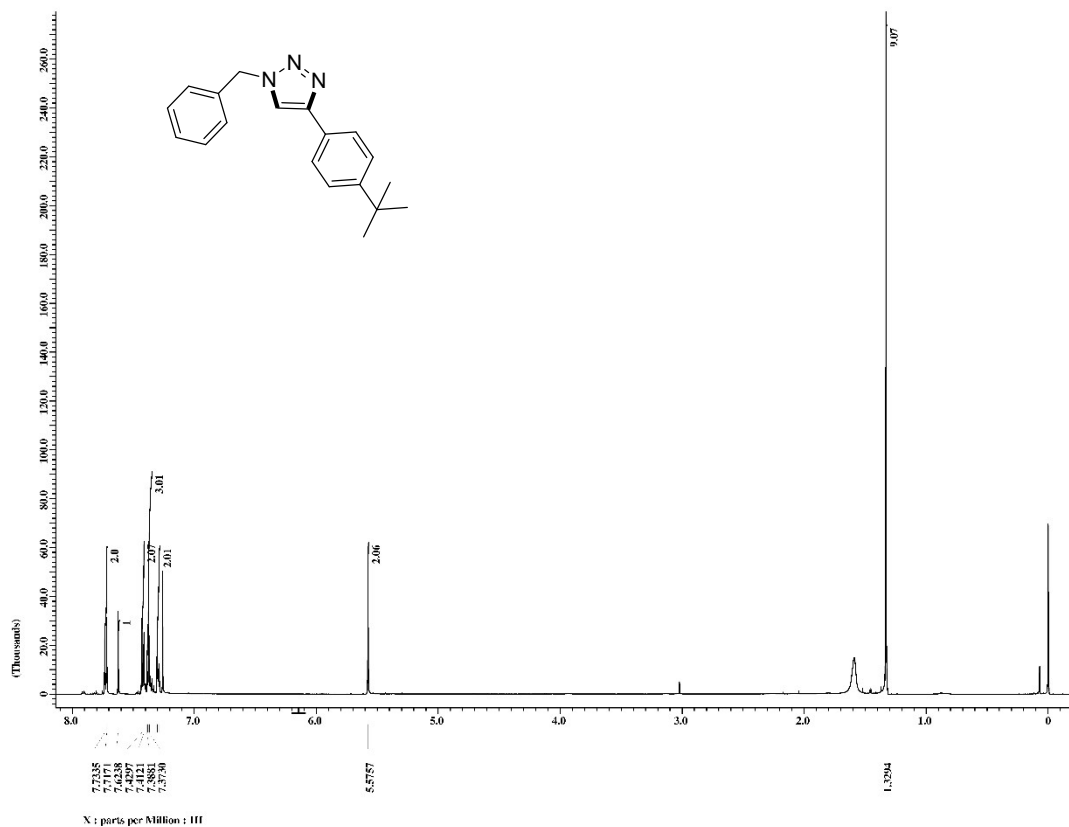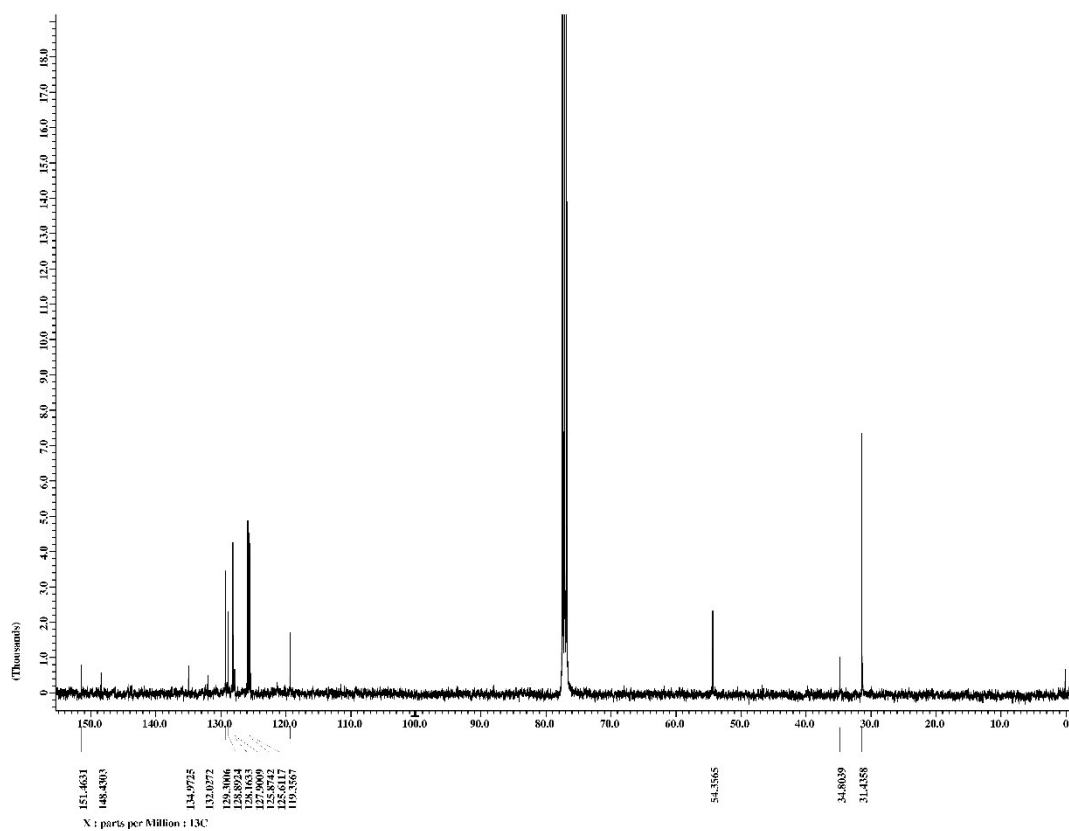

# <sup>1</sup>H and <sup>13</sup>C NMR of 6c:

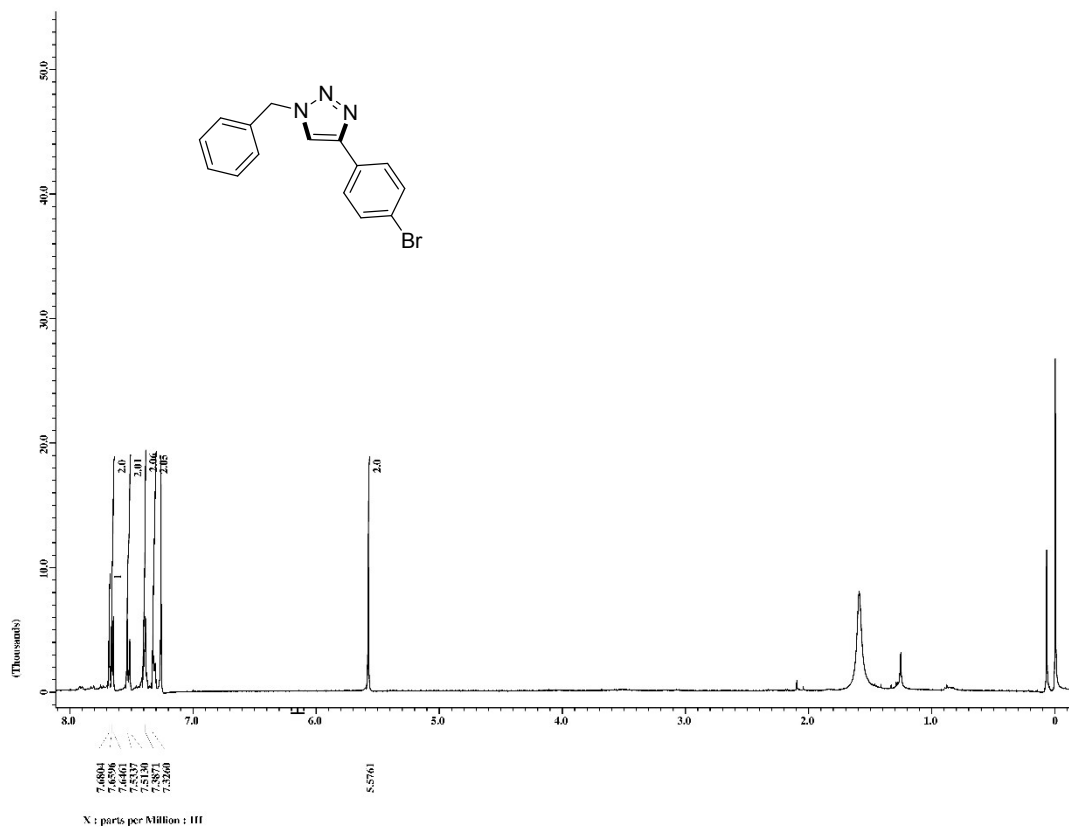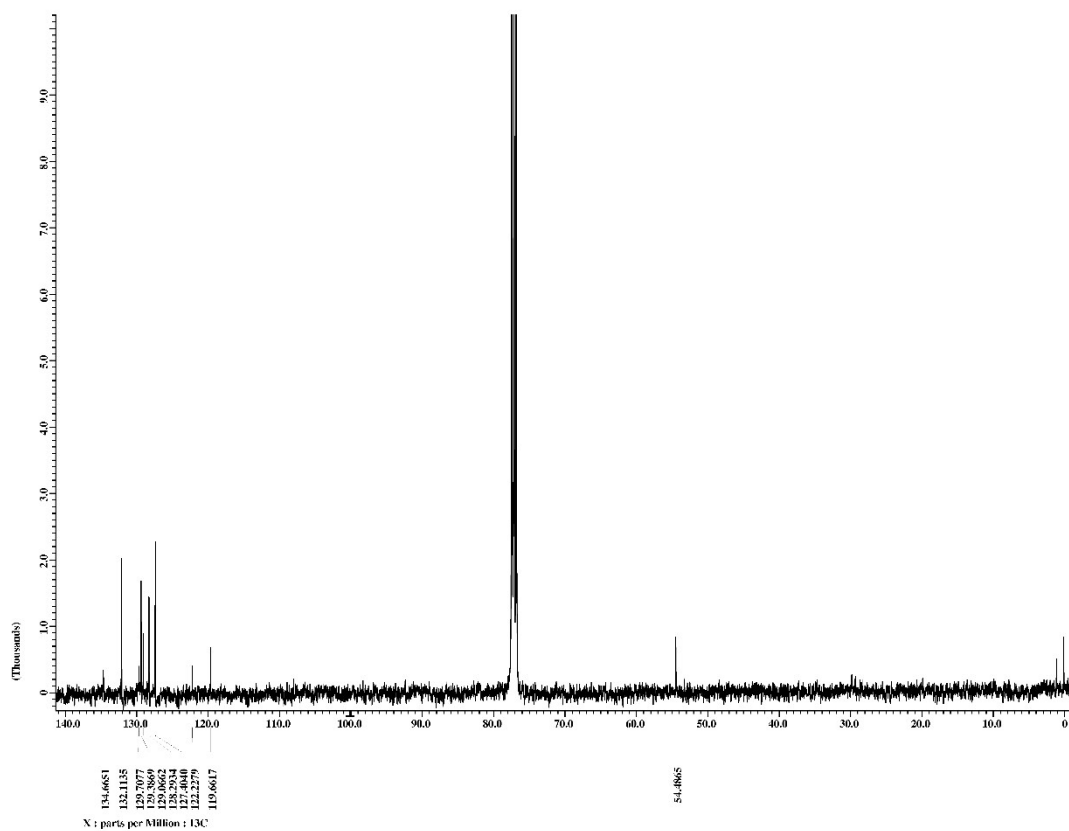



# <sup>1</sup>H and <sup>13</sup>C NMR of 6d:

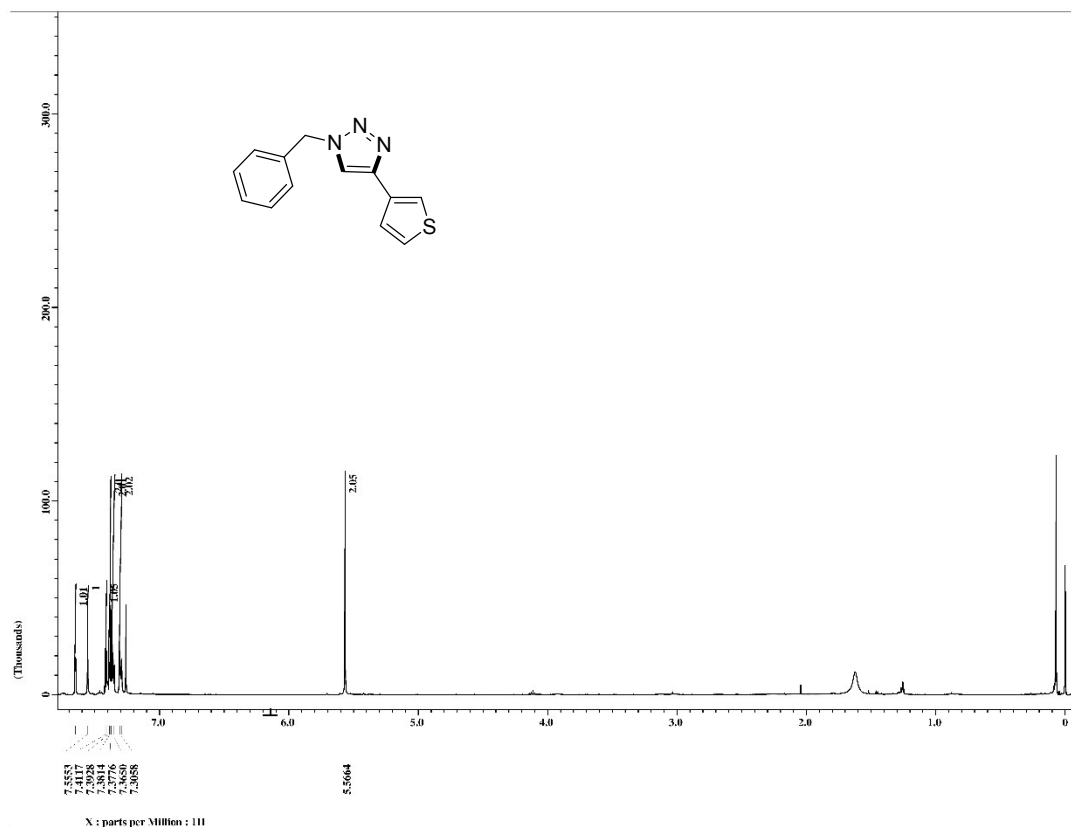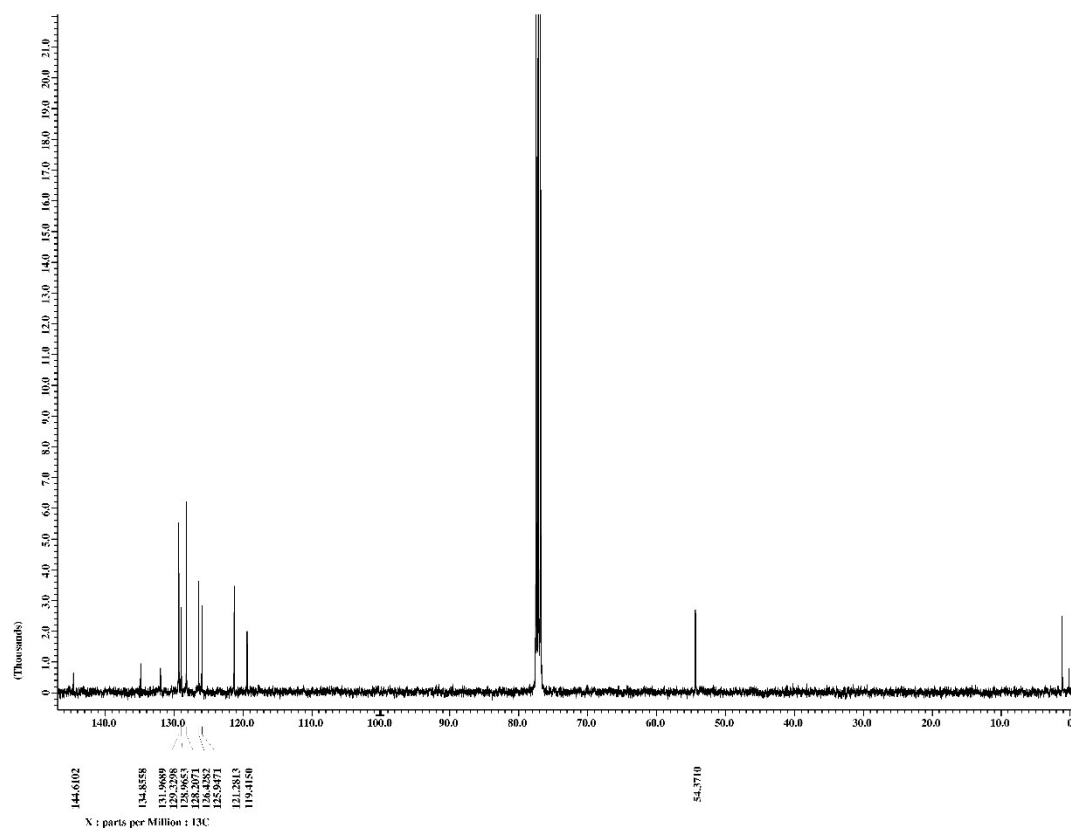

# <sup>1</sup>H and <sup>13</sup>C NMR of 6e:

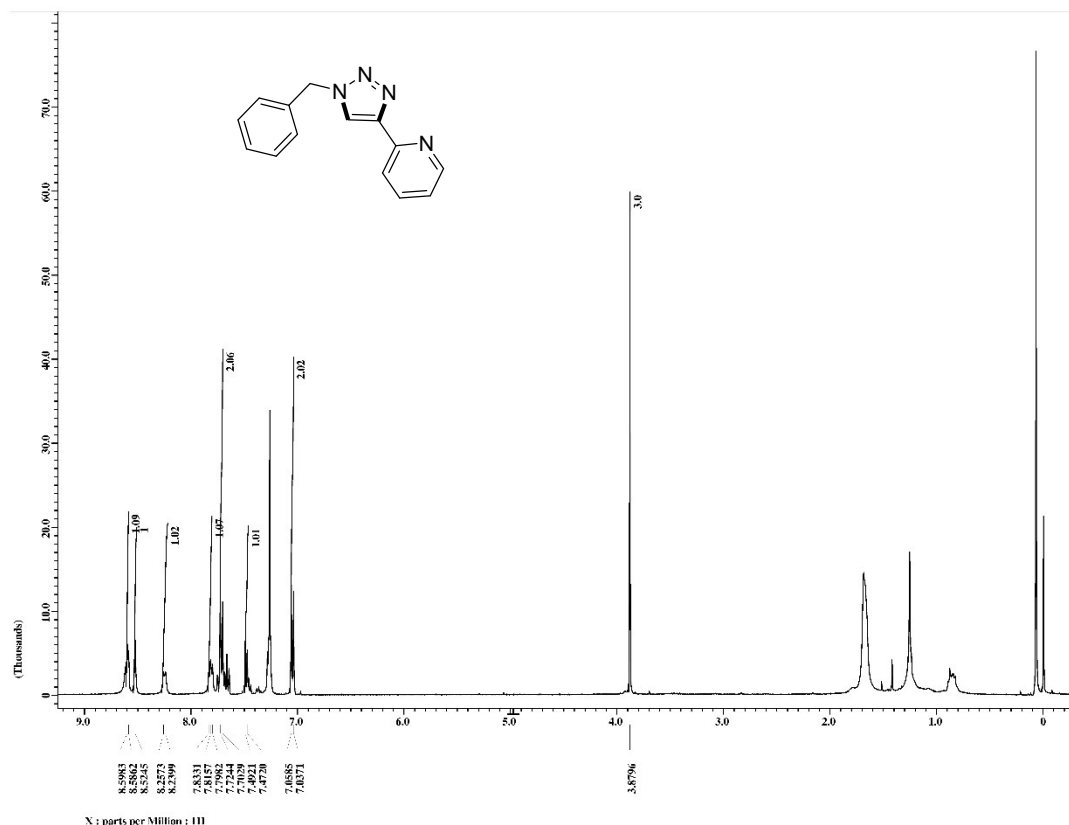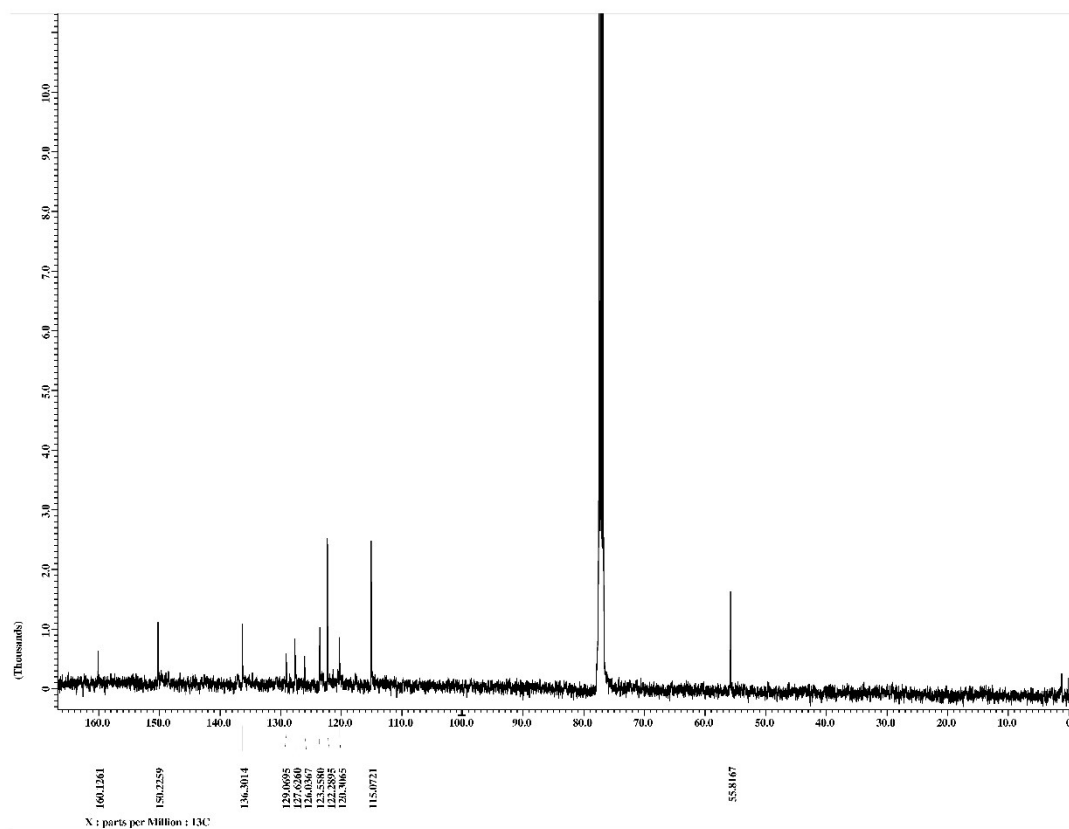

# <sup>1</sup>H and <sup>13</sup>C NMR of 6f:

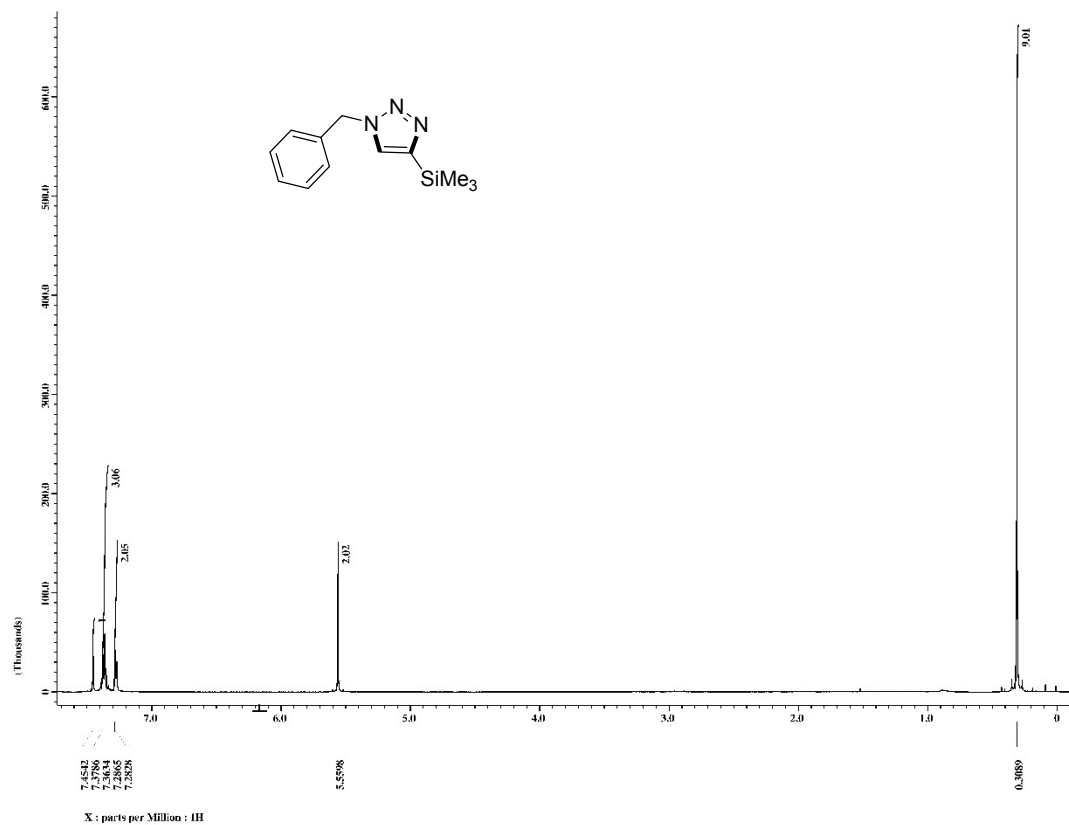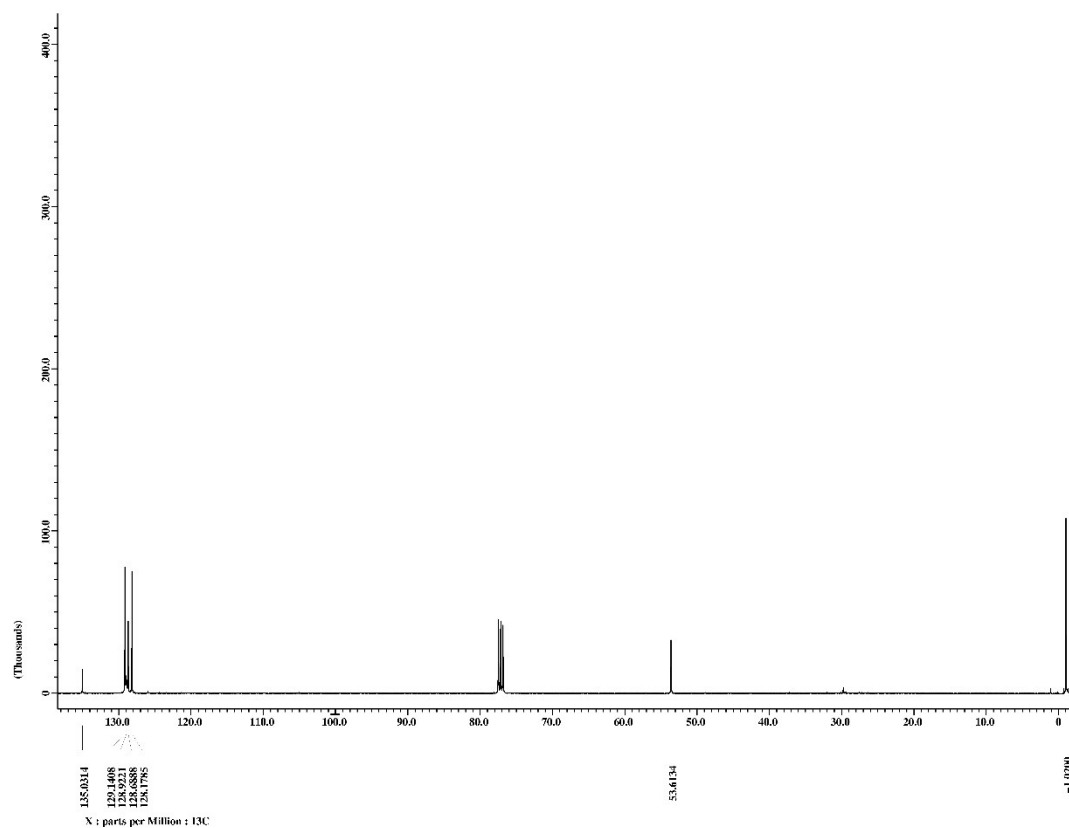

# <sup>1</sup>H and <sup>13</sup>C NMR of 6g:

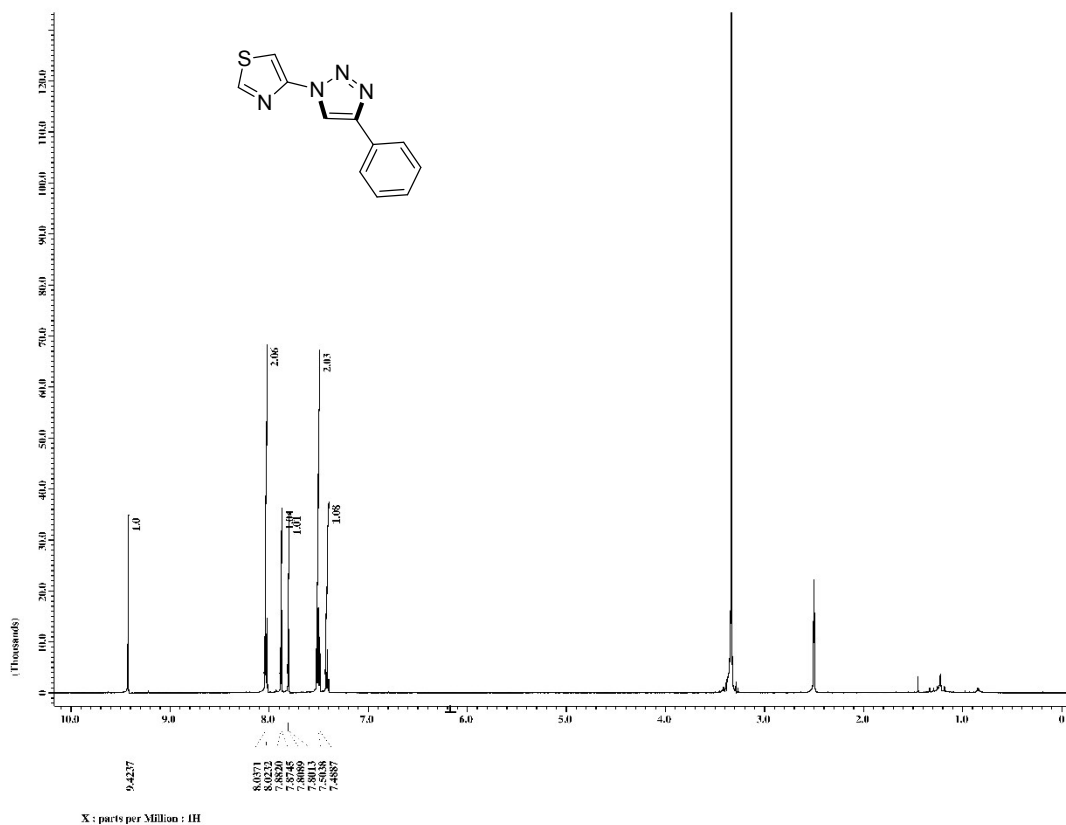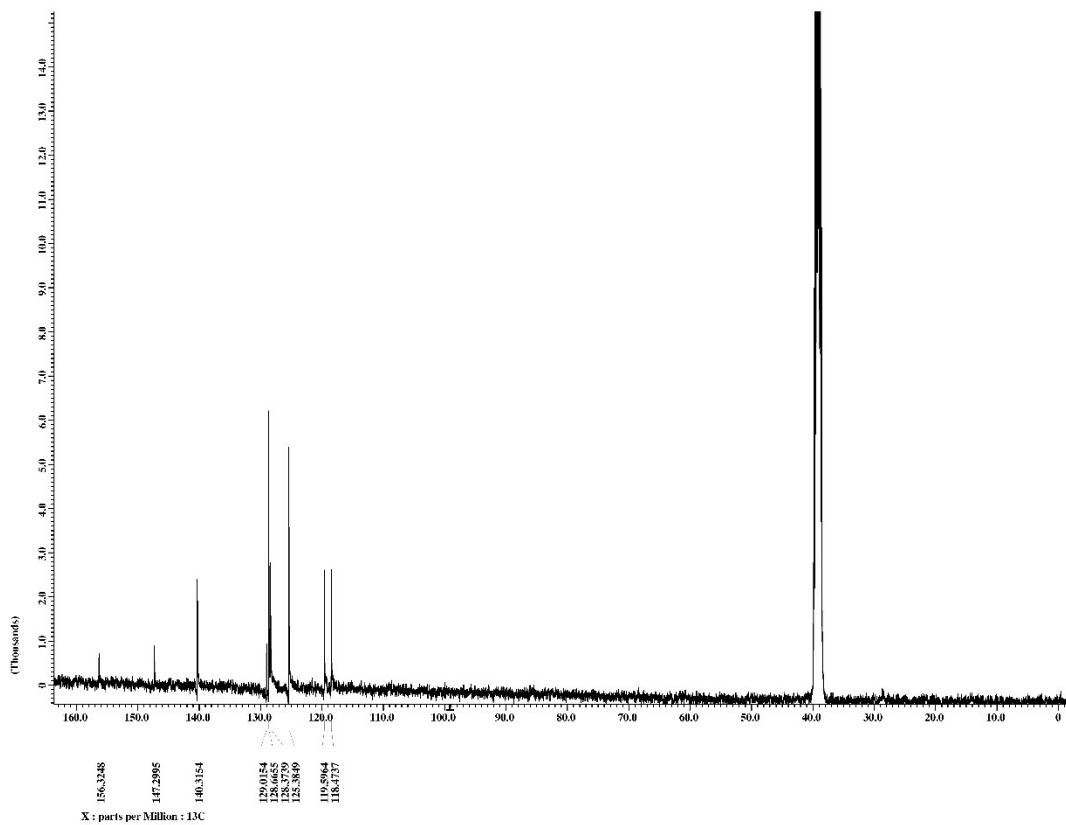

# <sup>1</sup>H and <sup>13</sup>C NMR of 6h:

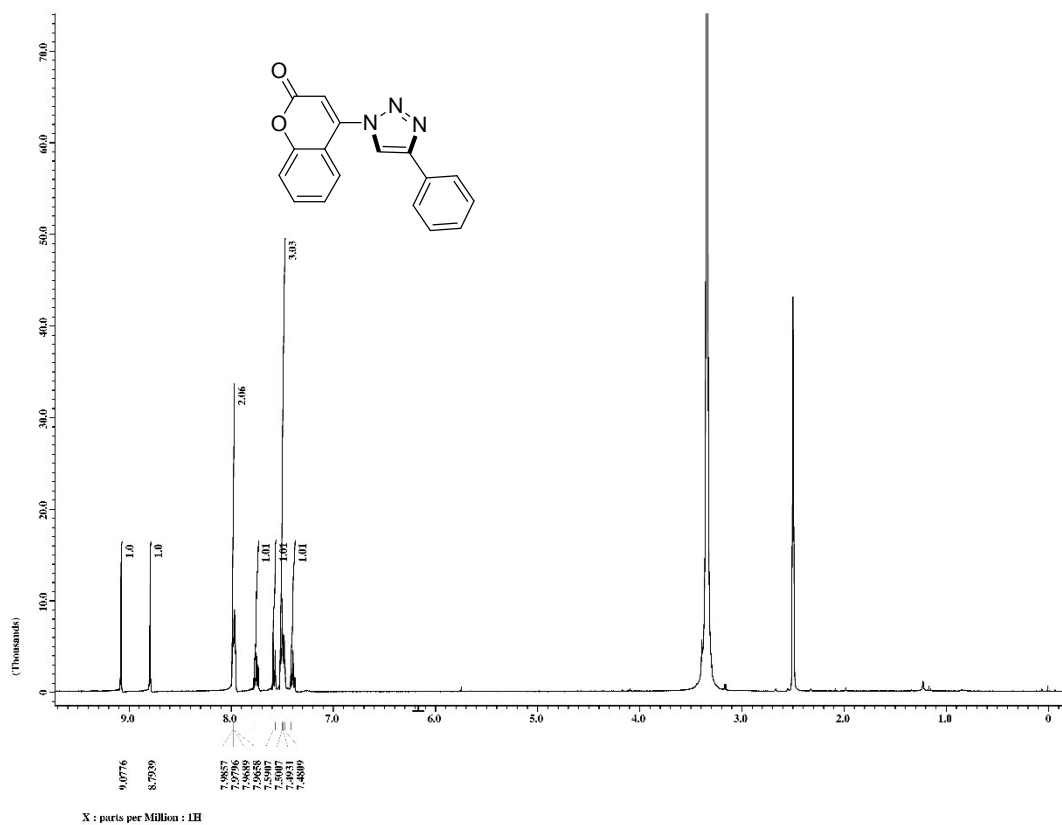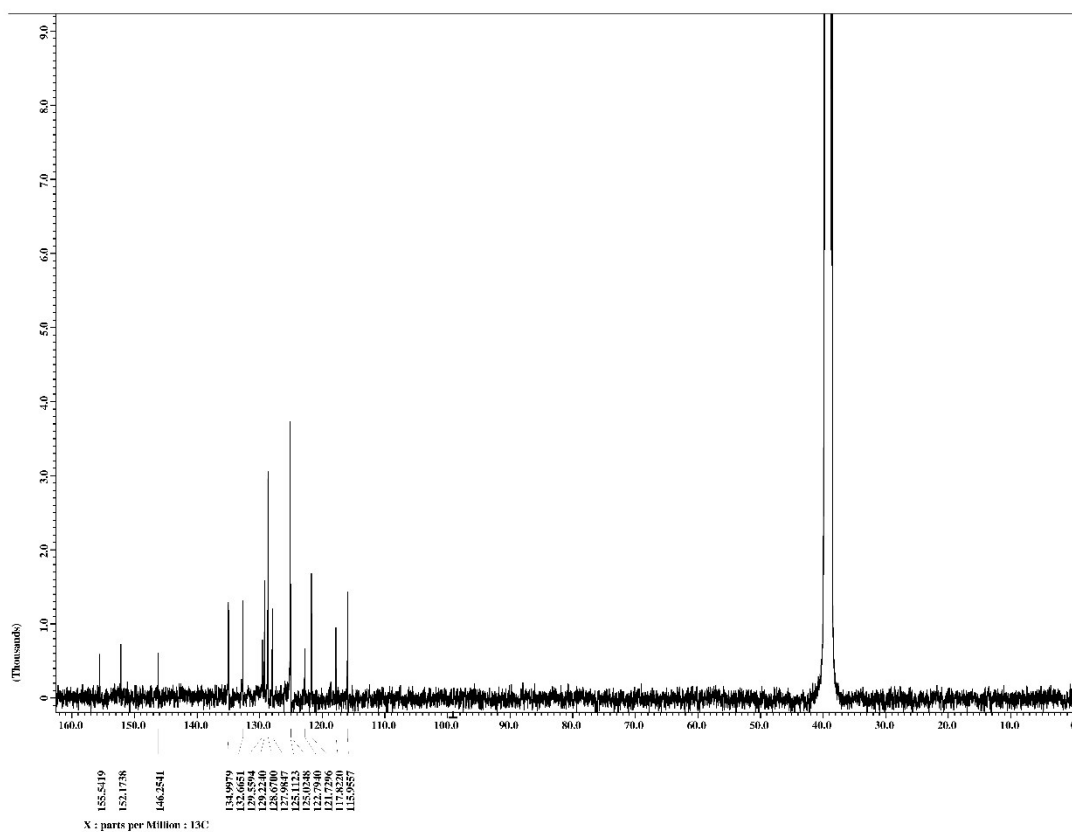

# <sup>1</sup>H and <sup>13</sup>C NMR of 6i:

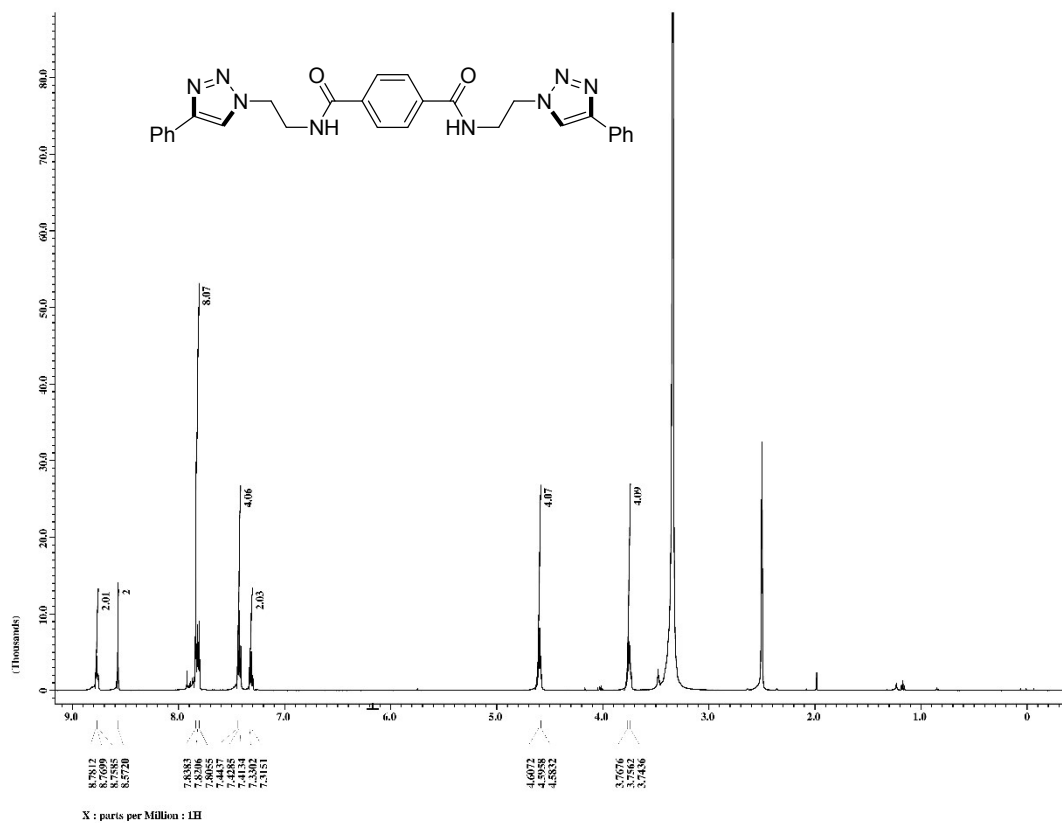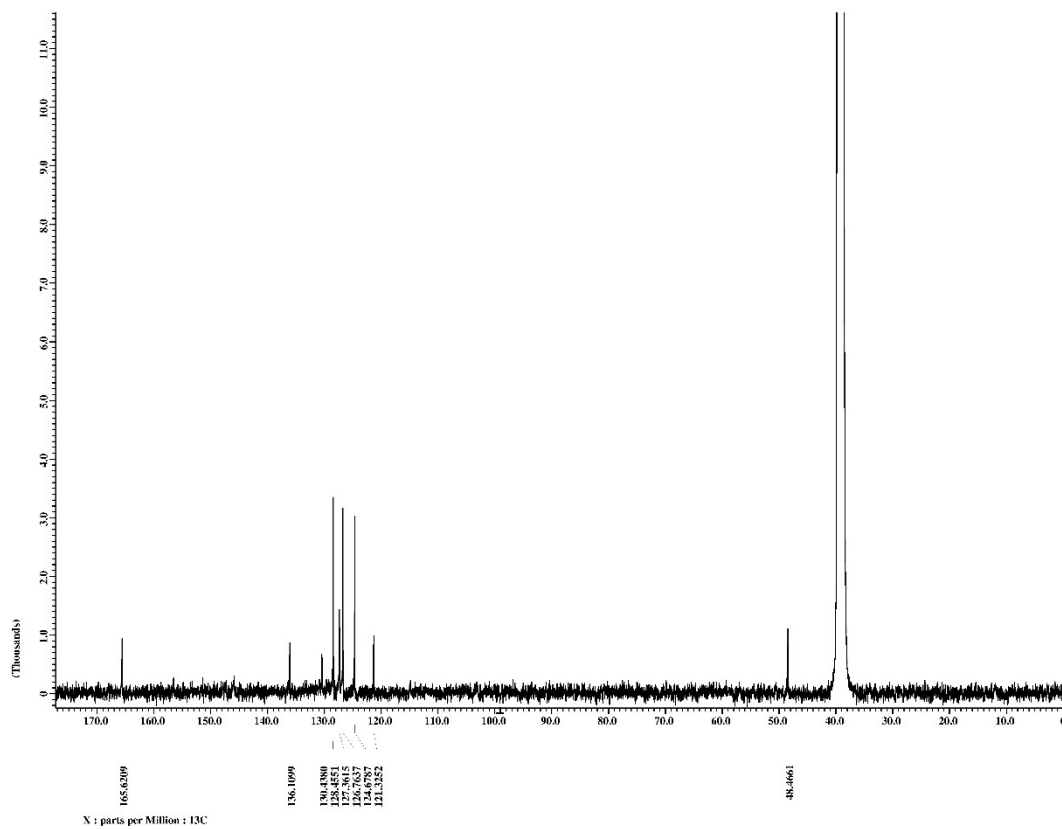

# $^1\text{H}$ and $^{13}\text{C}$ NMR of 6j:

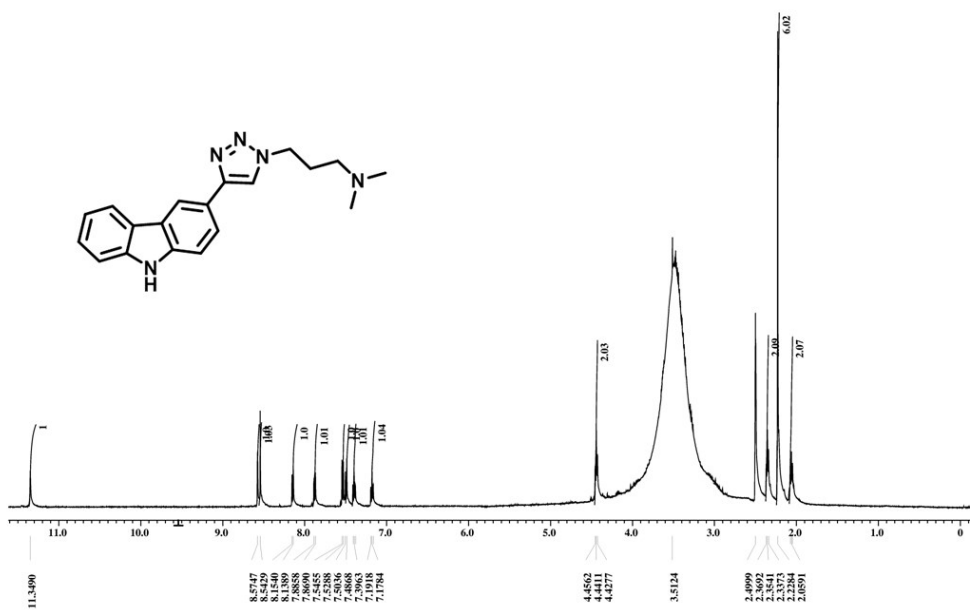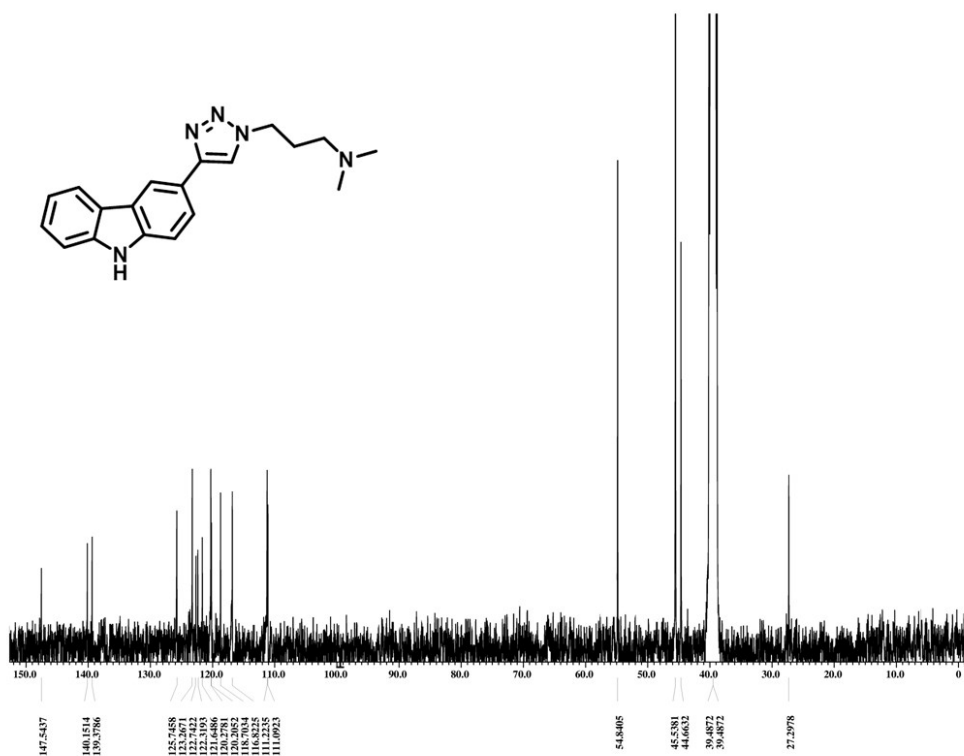

**<sup>1</sup>H and <sup>13</sup>C NMR of 6k:**

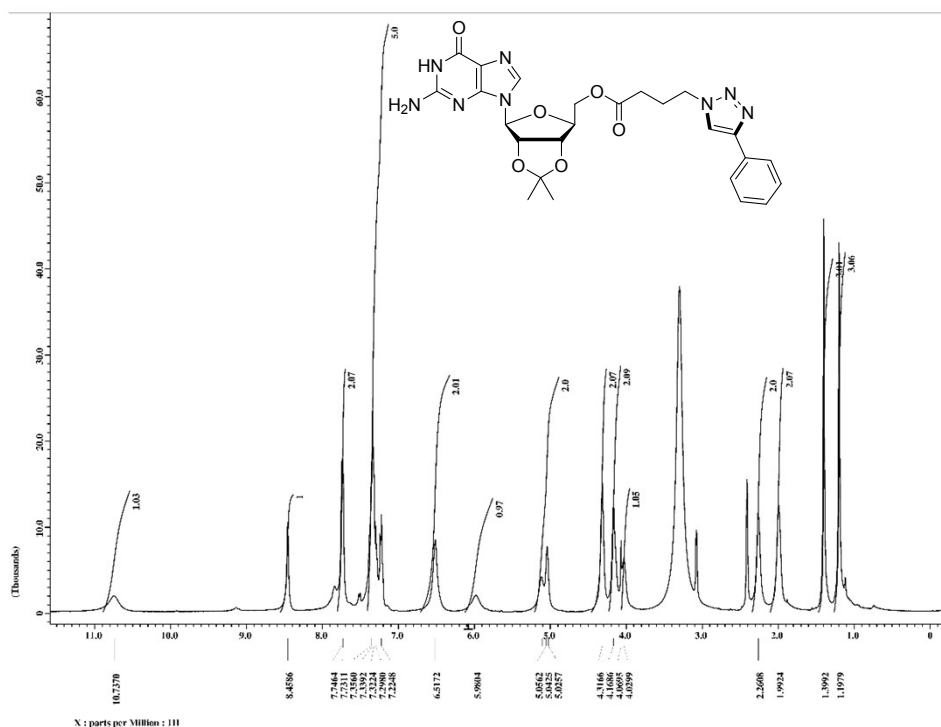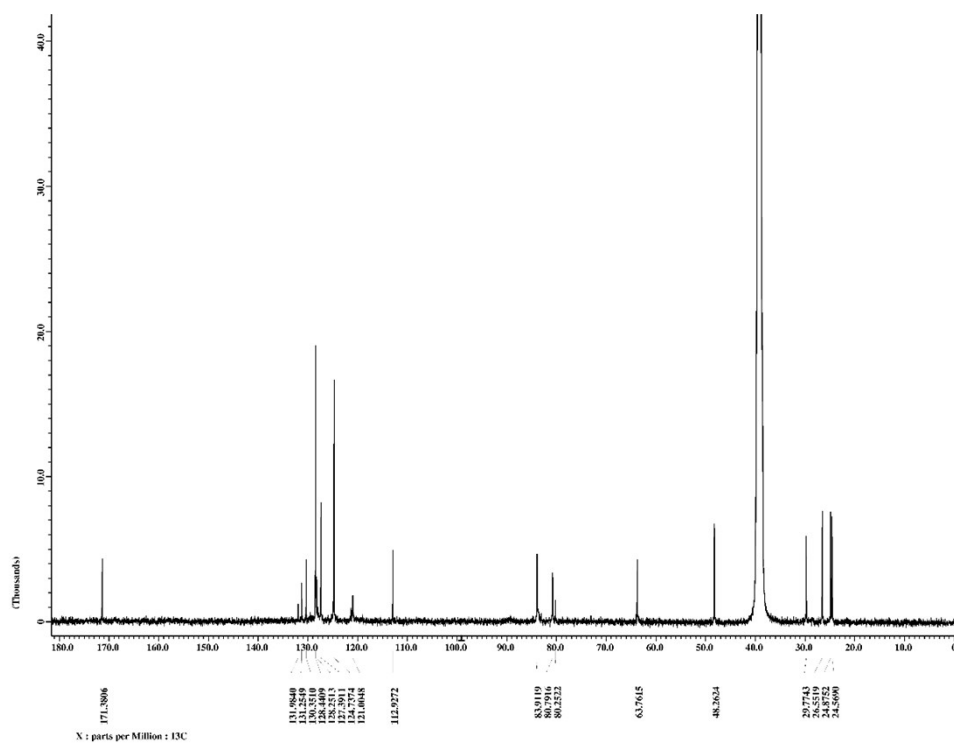



# <sup>1</sup>H and <sup>13</sup>C NMR of 6l:

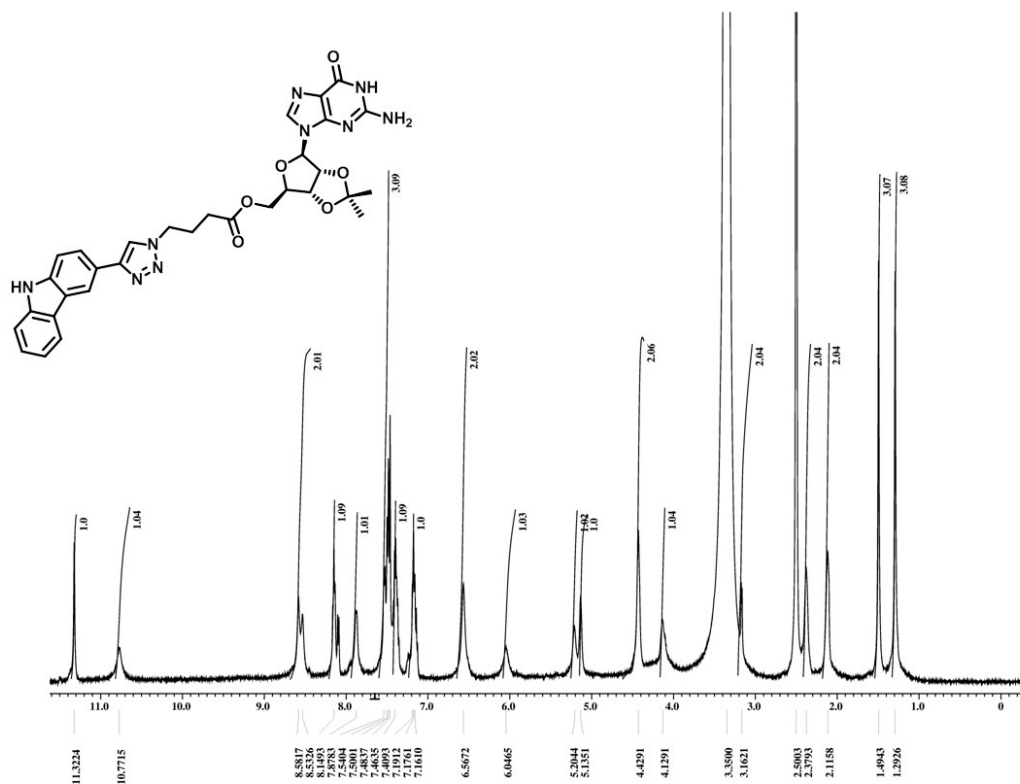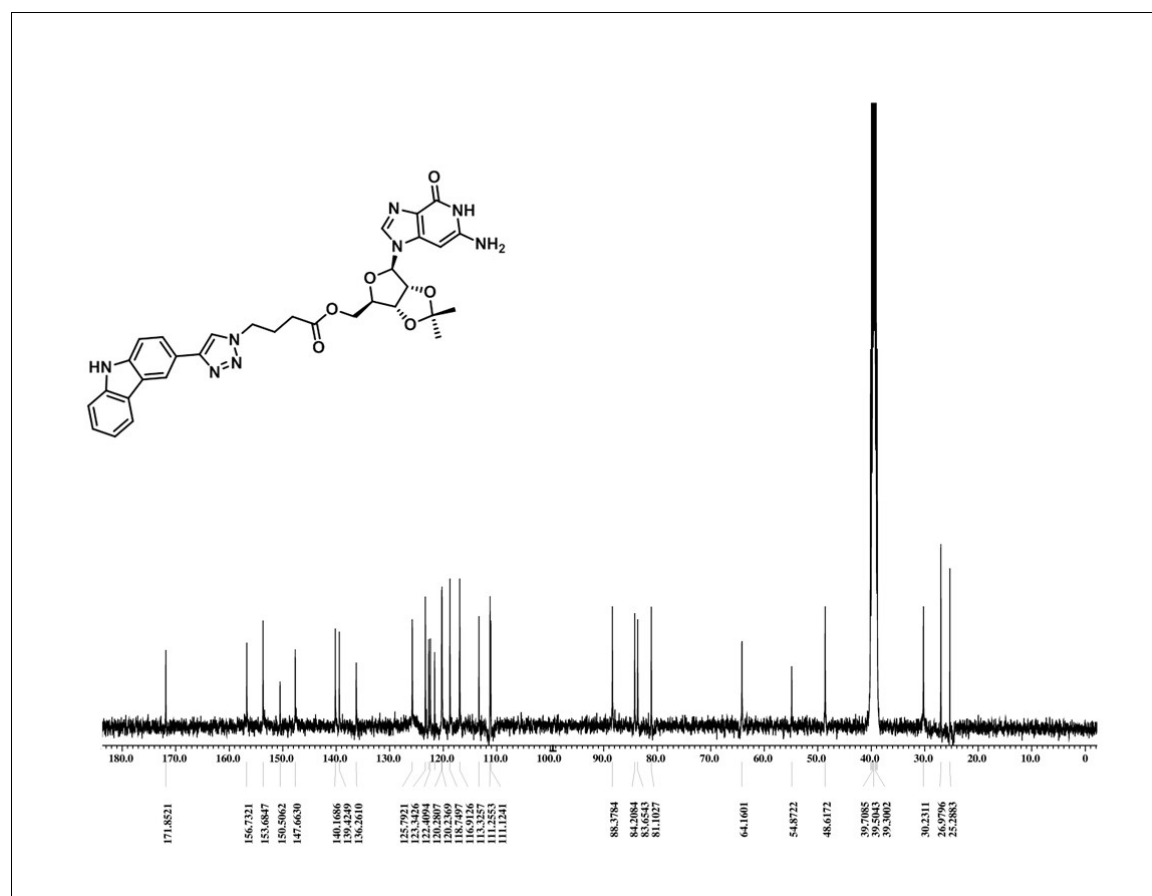

# $^1\text{H}$ and $^{13}\text{C}$ NMR of 6m:

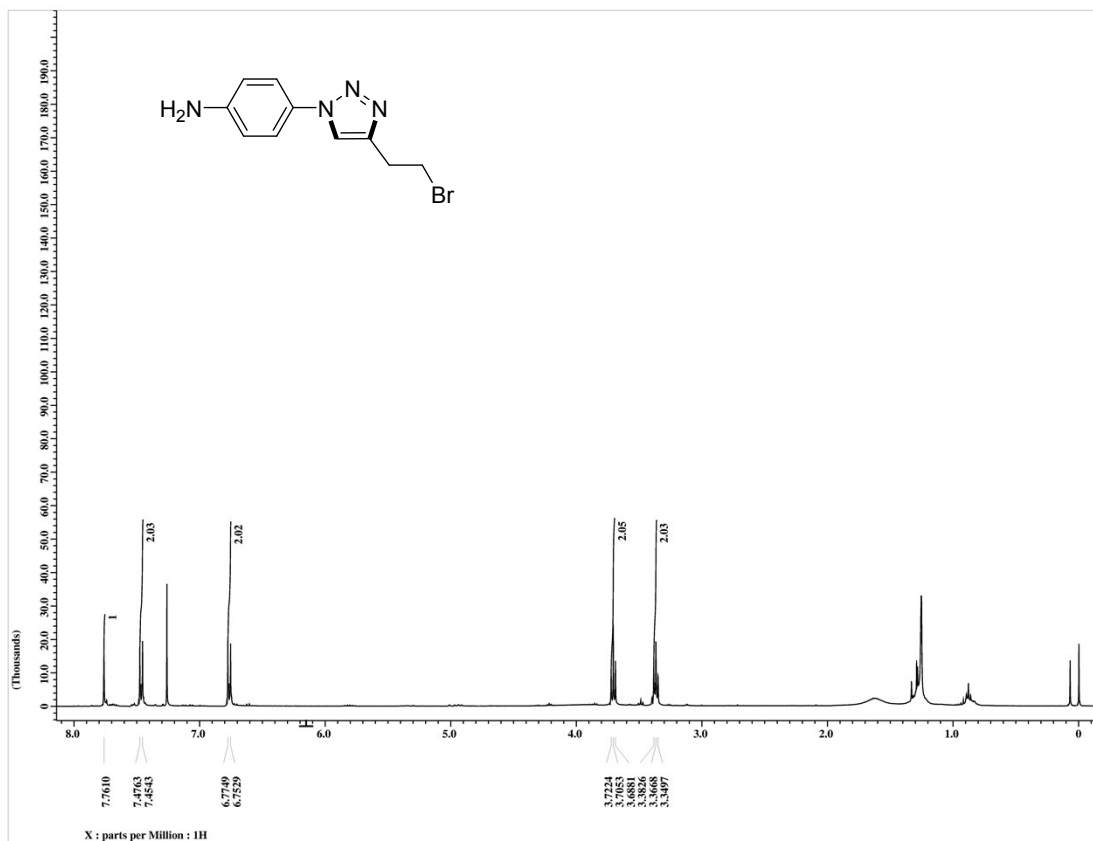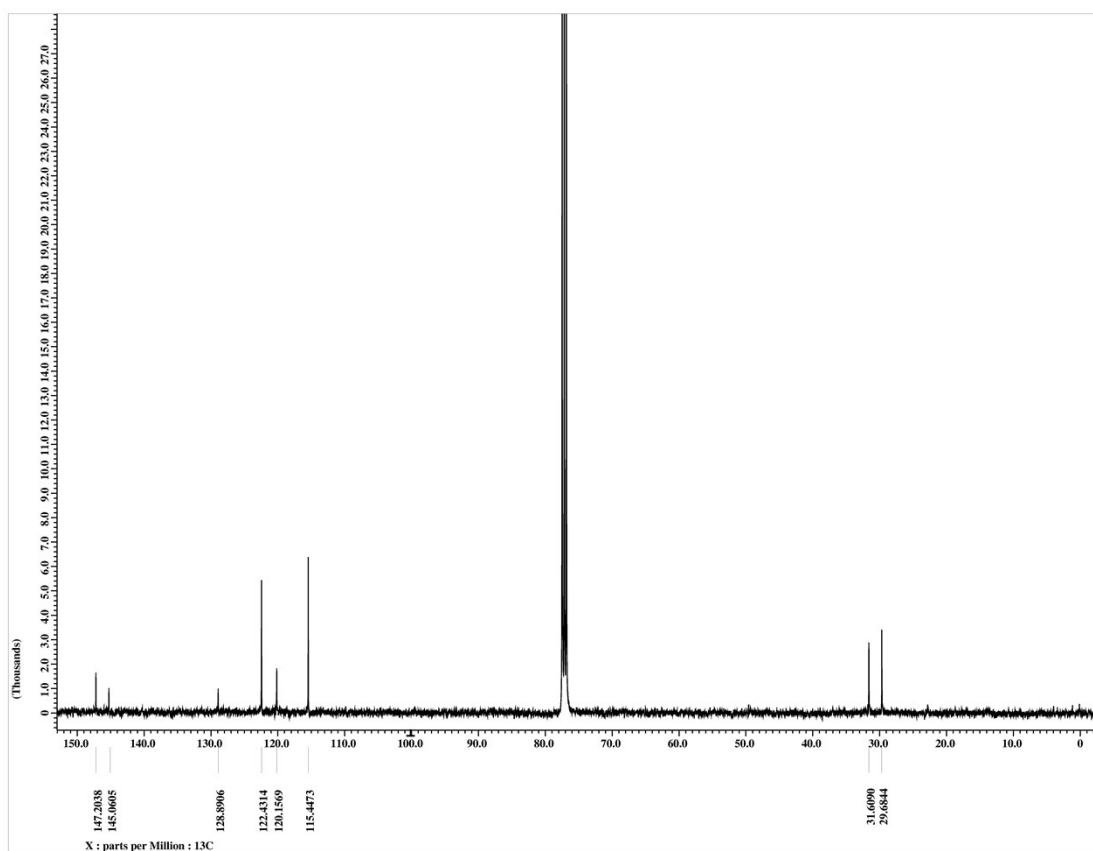

**$^1\text{H}$  and  $^{13}\text{C}$  NMR of 6n:**

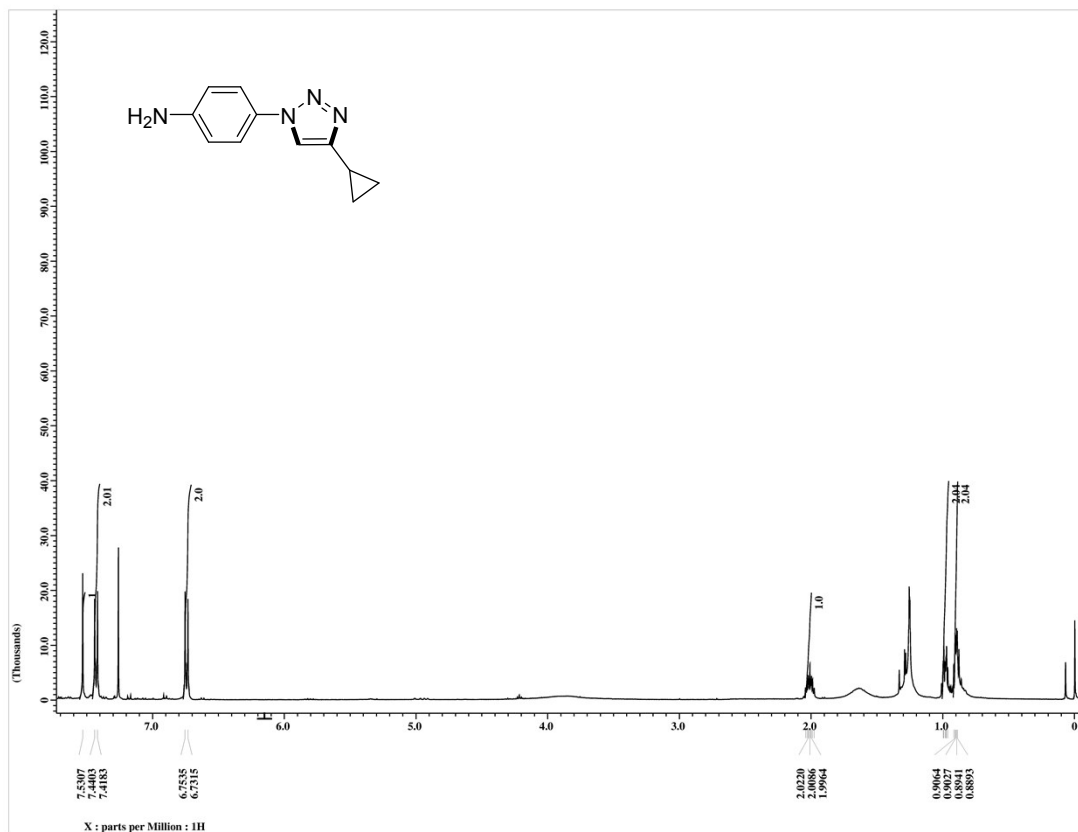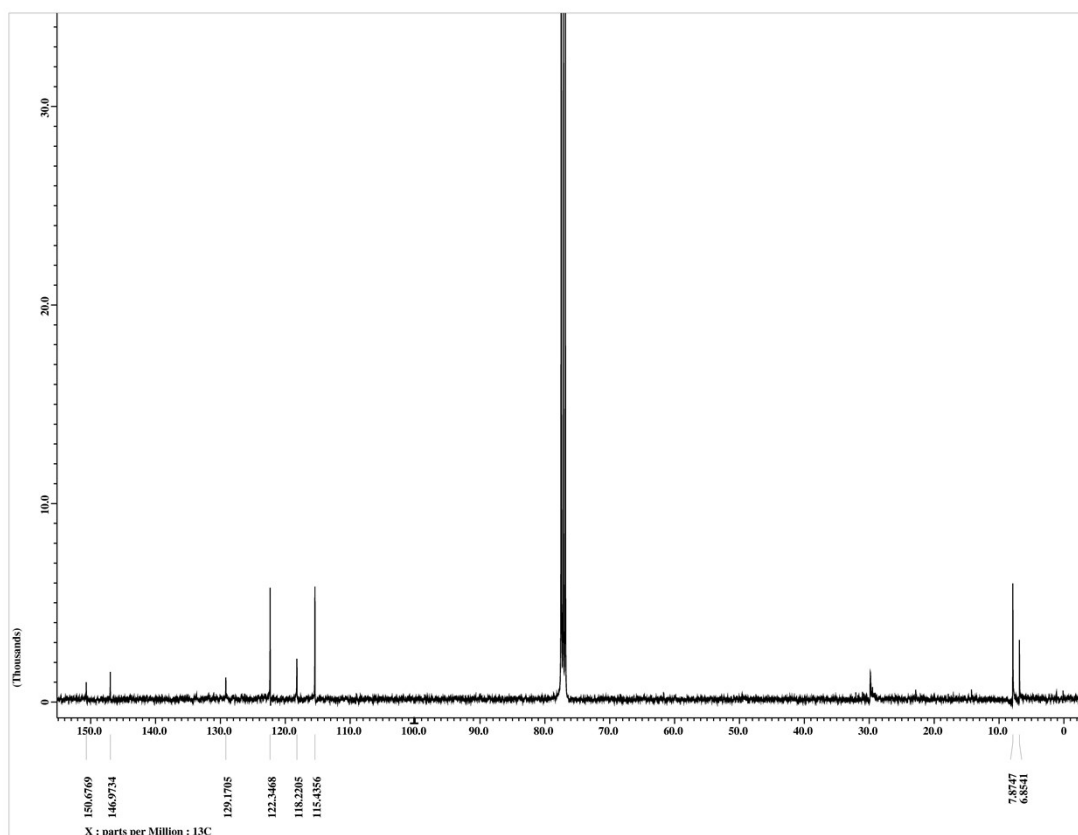

# <sup>1</sup>H and <sup>13</sup>C NMR of 6o:

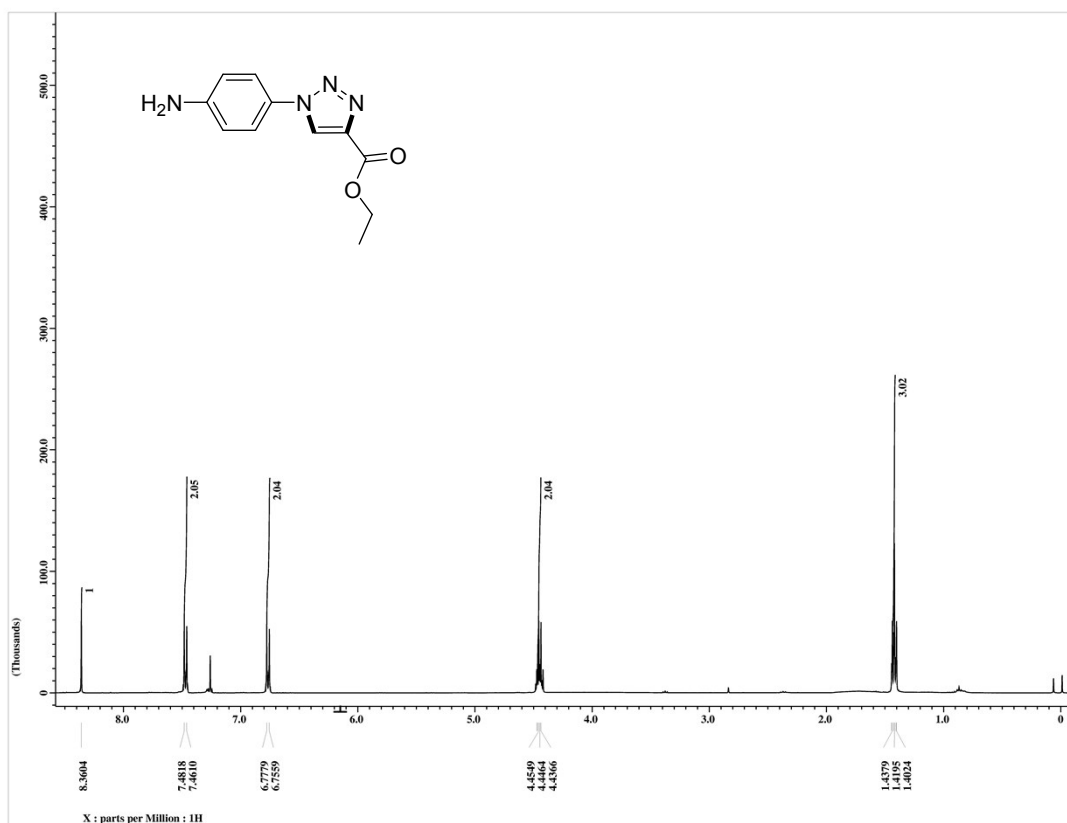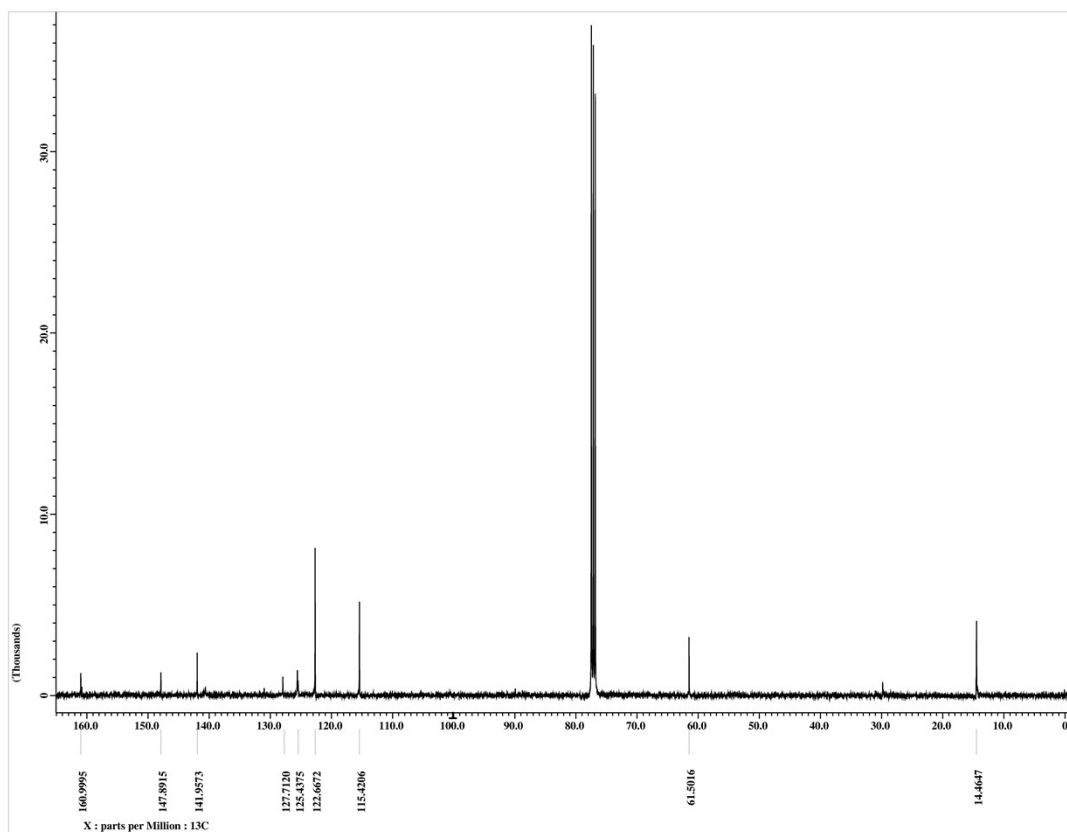

# <sup>1</sup>H and <sup>13</sup>C NMR of 11a:

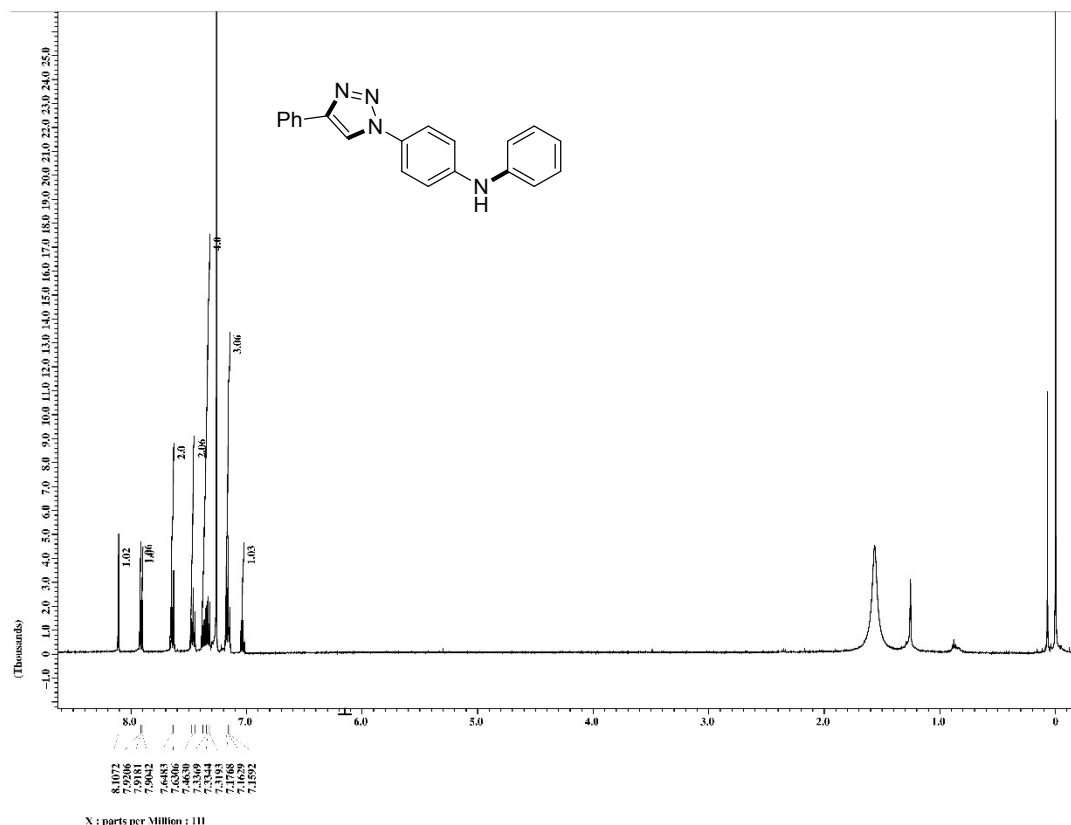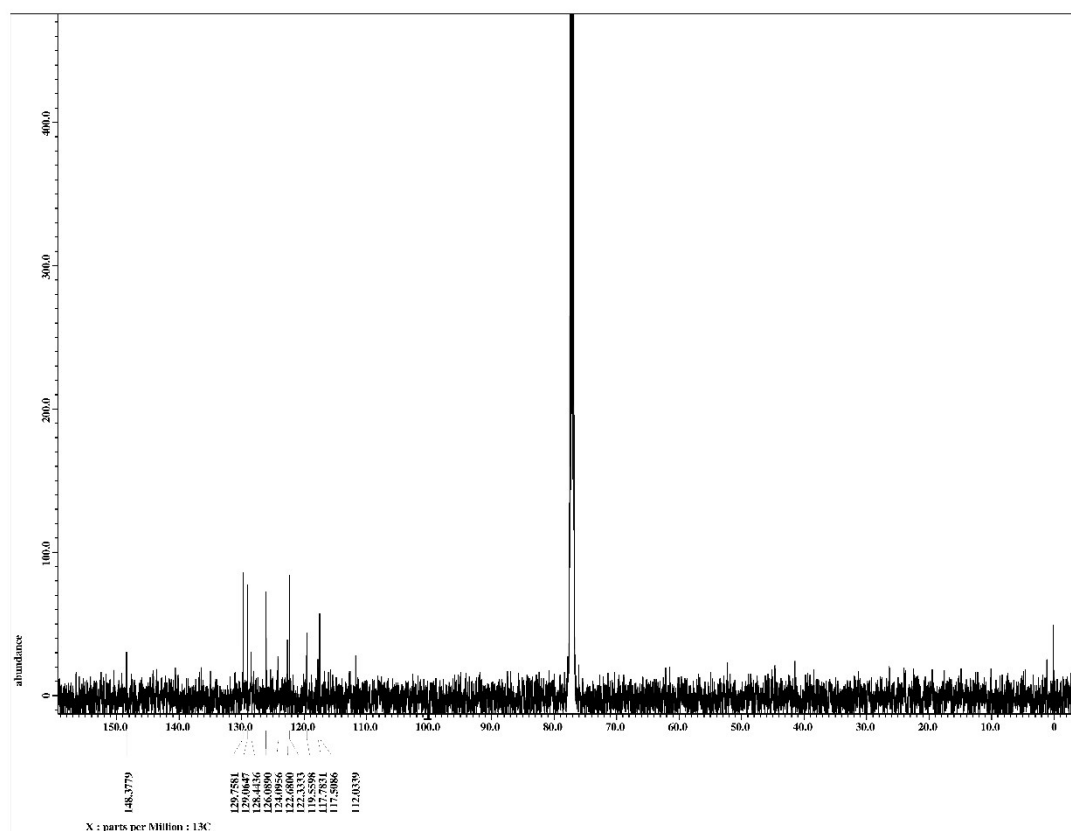

**<sup>1</sup>H and <sup>13</sup>C NMR of 11b:**

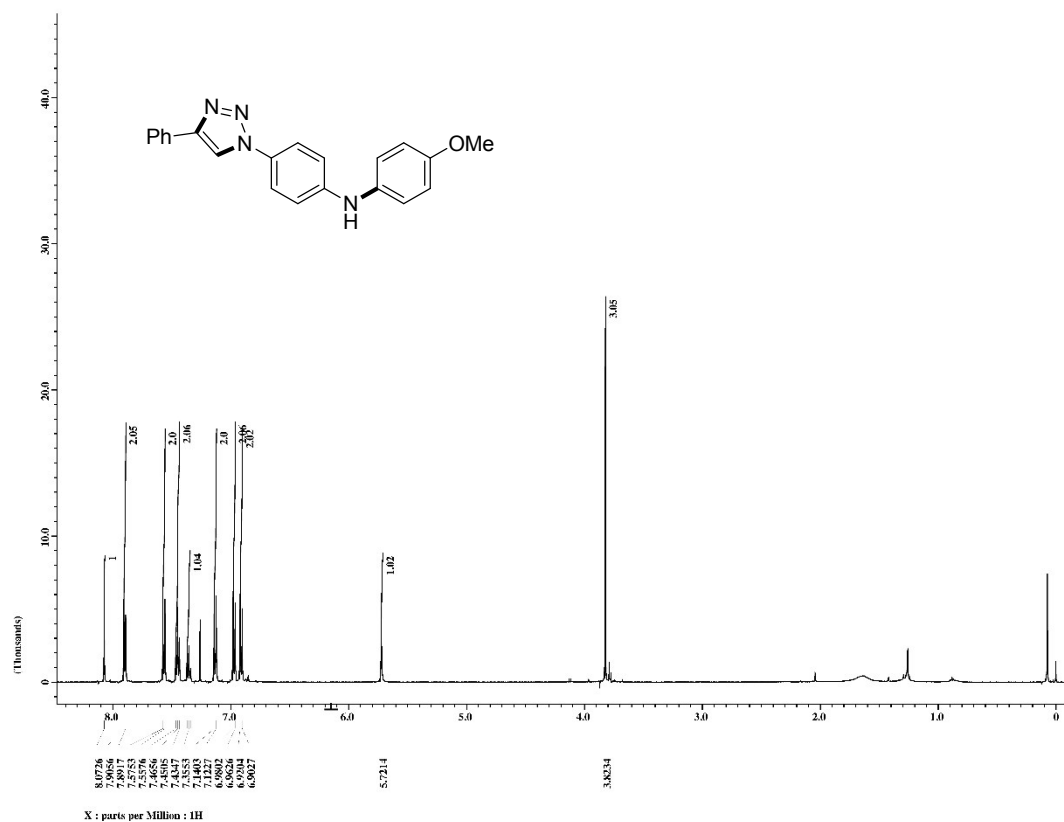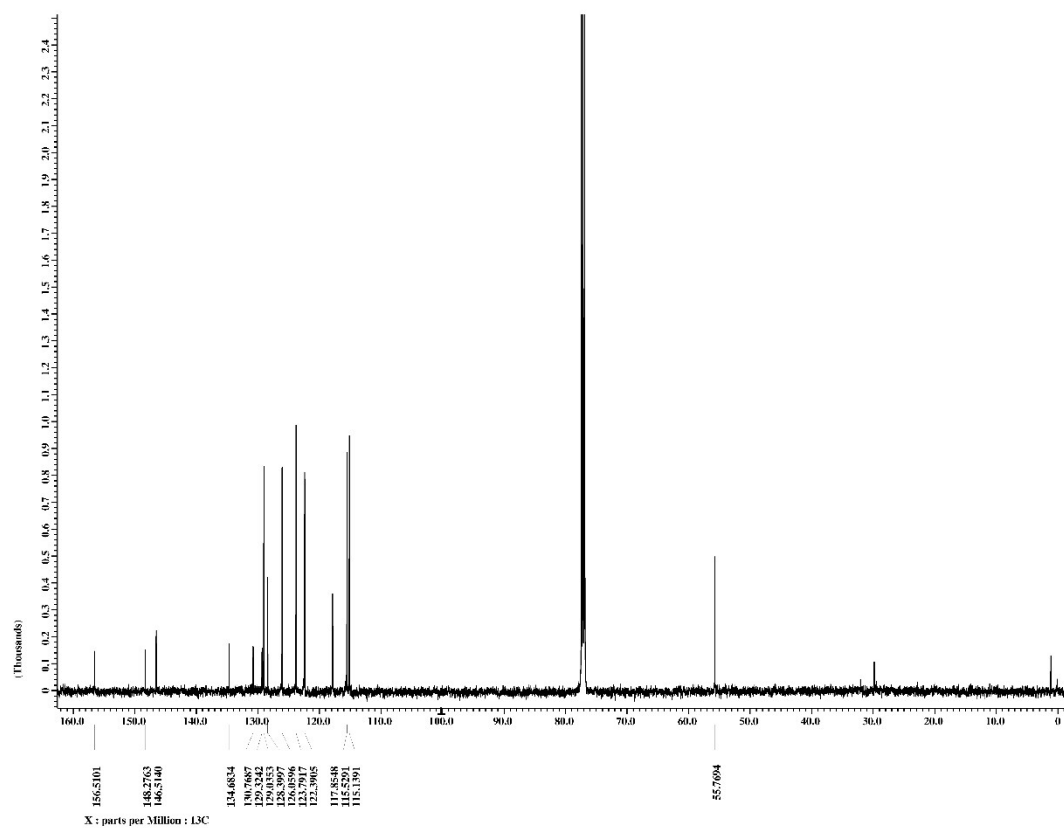

**<sup>1</sup>H and <sup>13</sup>C NMR of 11c:**

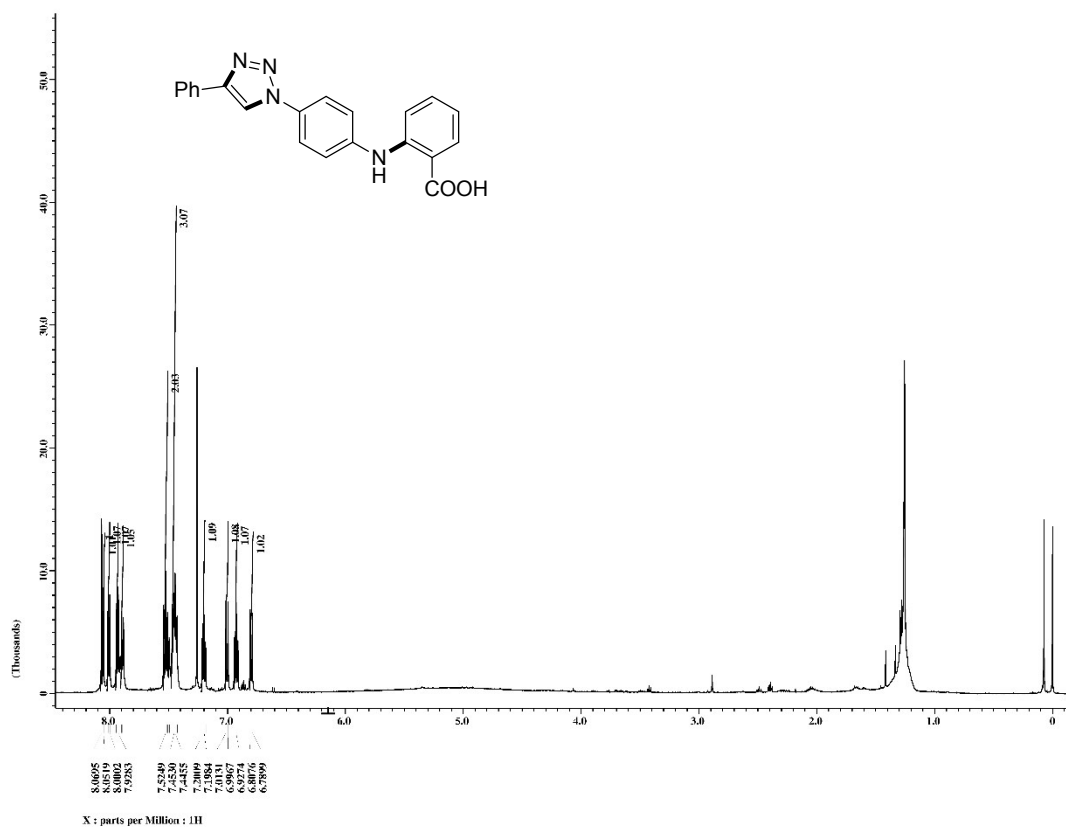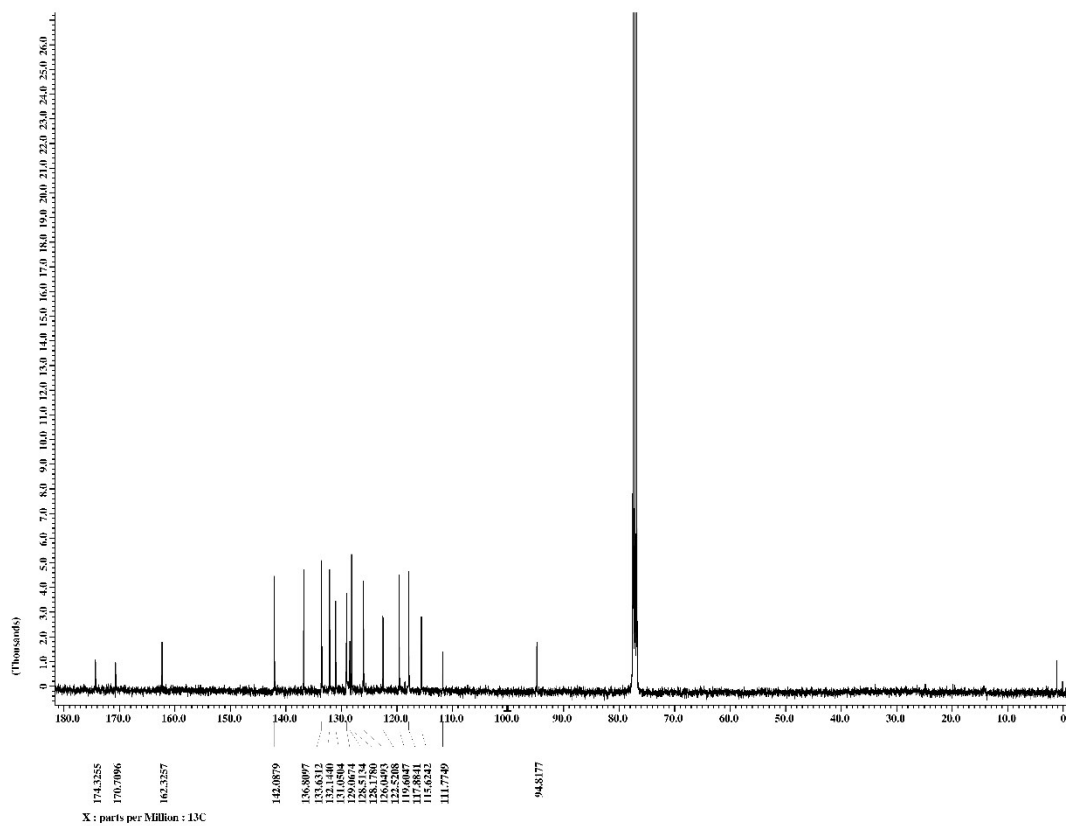

# $^1\text{H}$ and $^{13}\text{C}$ NMR of 11d:

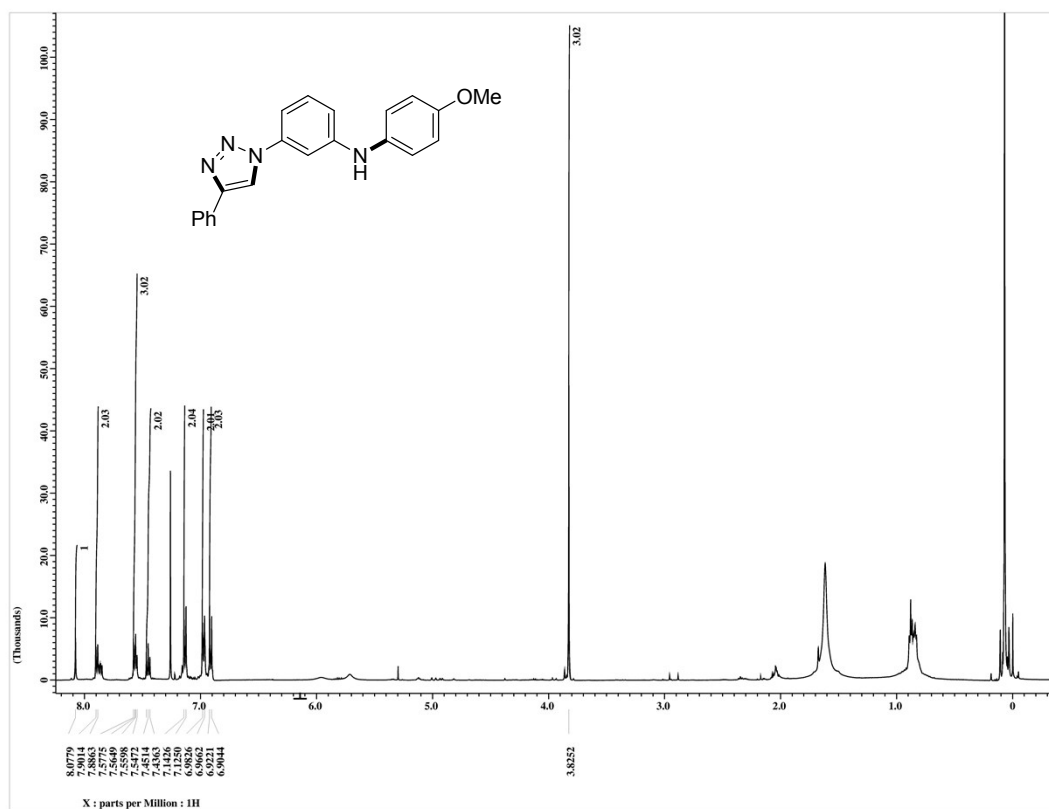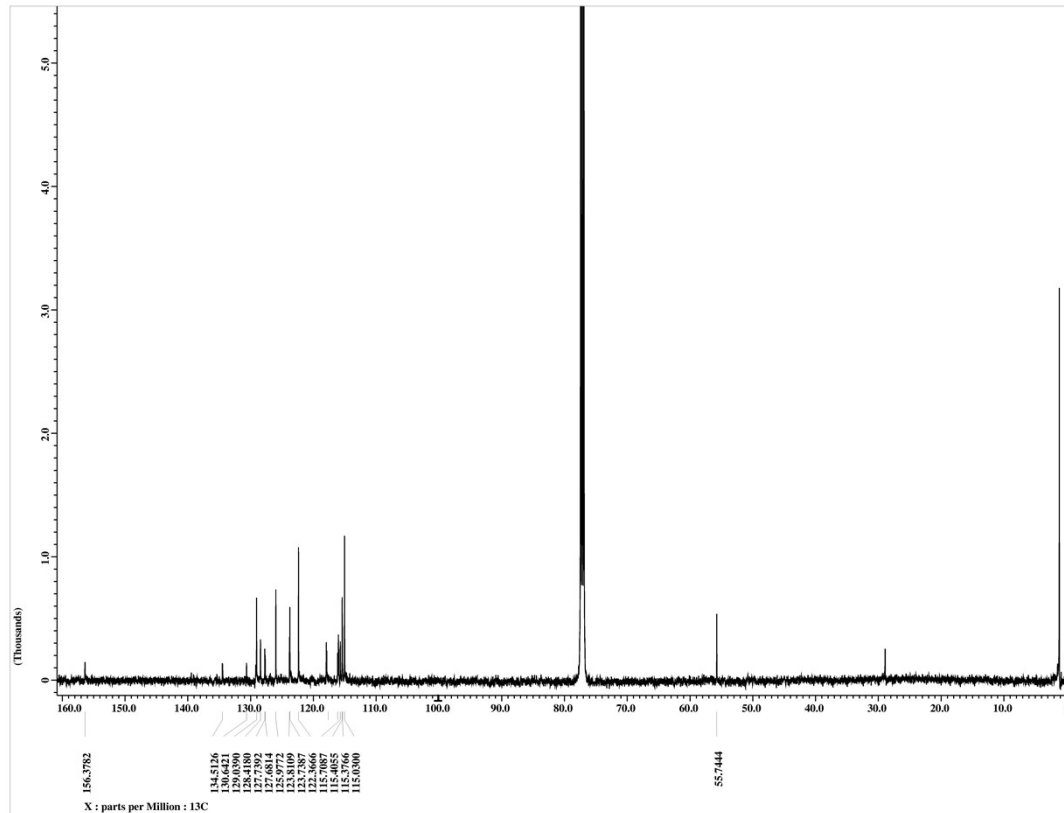

Supplement: d0qo01150a1.pdf [file d0qo01150a1.pdf]
